# Supplementary material for: Content and outcomes of narrative medicine programmes: a systematic review of the literature through 2019
Source: PubMed Central journal article supplement — BMJ Open. 2020 Jan 26;10(1):e031568. doi: 10.1136/bmjopen-2019-031568 (PMC7045204; doi:10.1136/bmjopen-2019-031568), 2020-01-26
Supplement: bmjopen-2019-031568.draft_revisions.pdf [file bmjopen-2019-031568.draft_revisions.pdf]

# BMJ Open

BMJ Open is committed to open peer review. As part of this commitment we make the peer review history of every article we publish publicly available.

When an article is published we post the peer reviewers' comments and the authors' responses online. We also post the versions of the paper that were used during peer review. These are the versions that the peer review comments apply to.

The versions of the paper that follow are the versions that were submitted during the peer review process. They are not the versions of record or the final published versions. They should not be cited or distributed as the published version of this manuscript.

BMJ Open is an open access journal and the full, final, typeset and author-corrected version of record of the manuscript is available on our site with no access controls, subscription charges or pay-per-view fees (<http://bmjopen.bmj.com>).

If you have any questions on BMJ Open's open peer review process please email [info.bmjopen@bmj.com](mailto:info.bmjopen@bmj.com)

# BMJ Open

## Content and Outcomes of Narrative Medicine Programs: A Systematic Review of the Literature through 2017

|                               |                                                                                                                                                                                                                                                                                                                                                                                                                                                                                                                     |
|-------------------------------|---------------------------------------------------------------------------------------------------------------------------------------------------------------------------------------------------------------------------------------------------------------------------------------------------------------------------------------------------------------------------------------------------------------------------------------------------------------------------------------------------------------------|
| Journal:                      | <i>BMJ Open</i>                                                                                                                                                                                                                                                                                                                                                                                                                                                                                                     |
| Manuscript ID                 | bmjopen-2019-031568                                                                                                                                                                                                                                                                                                                                                                                                                                                                                                 |
| Article Type:                 | Research                                                                                                                                                                                                                                                                                                                                                                                                                                                                                                            |
| Date Submitted by the Author: | 09-May-2019                                                                                                                                                                                                                                                                                                                                                                                                                                                                                                         |
| Complete List of Authors:     | Di Frances, Christy; Boston University School of Medicine, Medicine; Childs, Ellen; Boston University School of Public Health Pasco, John; Boston University School of Medicine Trinquart, L; Boston University School of Public Health Flynn, David; Boston University School of Medicine Wingerter, Sarah; Boston University School of Medicine Bhasin, Robina; Boston University School of Medicine Demers, Lindsay; Boston University School of Medicine Benjamin, Emelia; Boston University School of Medicine |
| Keywords:                     | MEDICAL EDUCATION & TRAINING, MEDICAL ETHICS, EDUCATION & TRAINING (see Medical Education & Training)                                                                                                                                                                                                                                                                                                                                                                                                               |
|                               |                                                                                                                                                                                                                                                                                                                                                                                                                                                                                                                     |

SCHOLARONE™  
Manuscripts

1  
2  
3  
4  
5  
6 **Content and Outcomes of Narrative Medicine Programs:**  
7  
8 **A Systematic Review of the Literature through 2017**  
9

10  
11  
12  
13  
14 Christy D. Di Frances, PhD, MA,\* Ellen Childs, PhD,\* John Carlo Pasco, MS, Ludovic  
15 Trinquart, PhD, David B. Flynn, MS(LIS), Sarah L. Wingerter, MD, Robina M. Bhasin,  
16 EdM, Lindsay B. Demers, PhD, MS, Emelia J. Benjamin, MD, ScM  
17

18  
19 *\*Christy D. Di Frances and Ellen Childs contributed equally to this paper.*  
20  
21  
22

23 **Christy D. Di Frances** is Assistant Professor and Director of the Narrative Writing  
24 Program, Department of Medicine, Boston University School of Medicine, Boston, MA,  
25 USA. ORCID: 0000-0002-0130-0326.  
26

27 **Ellen Childs** is a Research Scientist and Research Instructor in the Department of Law &  
28 Law Policy, Boston University School of Public Health, Boston, MA, USA. ORCID: 0000-  
29 0001-6177-8412.  
30

31  
32 **John Carlo Pasco** is a medical student at Boston University School of Medicine, Boston,  
33 MA, USA. ORCID: 0000-0001-7125-1147.  
34

35 **Ludovic Trinquart** is Assistant Professor of Biostatistics, Boston University School of  
36 Public Health, Boston, MA, USA. ORCID: 0000-0002-3028-4900.  
37

38  
39 **David B. Flynn**, MS(LIS) is Assistant Professor and Assistant Director of Library &  
40 Information Management Education, Alumni Medical Library, Boston University School  
41 of Medicine, Boston, MA, USA. ORCID: 0000-0002-7494-2098.  
42

43 **Sarah L. Wingerter** is Assistant Professor, Department of Pediatrics Emergency  
44 Medicine, Boston University School of Medicine, Boston, USA, MA. ORCID: 0000-0002-  
45 0859-5972  
46

47 **Robina M. Bhasin** is Assistant Professor and Director of Faculty Development and  
48 Diversity, Department of Medicine, and Director of Faculty Development, Boston  
49 University Medical Campus, Boston, MA, USA. ORCID: 0000-0002-2107-6595.  
50

51  
52 **Lindsay B. Demers** is Assistant Professor and Director of the Education Evaluation Core,  
53 Boston University School of Medicine, Boston, MA, USA. ORCID: 0000-0001-8119-1002  
54  
55  
56  
57  
58  
59

1  
2  
3  
4  
5  
6  
7  
8  
9  
10  
11  
12  
13  
14  
15  
16  
17  
18  
19  
20  
21  
22  
23  
24  
25  
26  
27  
28  
29  
30  
31  
32  
33  
34  
35  
36  
37  
38  
39  
40  
41  
42  
43  
44  
45  
46  
47  
48  
49  
50  
51  
52  
53  
54  
55  
56  
57  
58  
59  
60

## Content and Outcomes of Narrative Medicine Programs: A Systematic Review of the Literature through 2017

**Emelia J. Benjamin** is Assistant Provost for Faculty Development Boston University Medical Campus, and Professor, Department of Medicine, School of Medicine and Department of Epidemiology, School of Public Health, Boston University, Boston, MA, USA. ORCID: 0000-0003-4076-2336.

### Corresponding Author

Ellen Childs, PhD  
Research Scientist, Research Instructor  
Health Law, Policy & Management  
Boston University School of Public Health  
Email: [echilds@bu.edu](mailto:echilds@bu.edu) | Office Telephone: +1 617.358.2775

### Article Word Count

4,603 words

## Content and Outcomes of Narrative Medicine Programs: A Systematic Review of the Literature through 2017

### Abstract

### Objectives

Narrative Medicine incorporates stories into health sciences paradigms as fundamental aspects of the human experience. The aim of this systematic review is to document objectives, content, and evaluation outcomes of narrative medicine programs implemented in academic medicine and health sciences with the goal of providing recommendations regarding best practices for future narrative-based education.

### Methods

The authors conducted a systematic review of literature published through 2017. Eligible programming included textual analysis/close reading of published literature and creative/reflective writing. Qualifying participants comprised individuals from health sciences disciplines at varying levels. The authors reviewed and categorized program goals, content, and evaluation activities.

### Results

Of 1,712 identified records, 45 records (40 unique programs) were included. The authors documented program scope and evaluation design/methods to assess participant satisfaction and program efficacy. Evaluation methods lacked consistency, with only 75% (n=30) of programs reporting any form of evaluation. Some programs lacked thorough evaluations descriptions. Quantitative and qualitative evaluations deemed as well described assessed participant satisfaction and various competencies. Fifteen programs used

## Content and Outcomes of Narrative Medicine Programs: A Systematic Review of the Literature through 2017

quantitative evaluation (7 well described), whereas 26 programs used qualitative evaluation (22 well described). Well-described quantitative evaluations relied on 20 different measures (7 validated) and showed evidence of high participant satisfaction and pre-post improvement in empathy, perspective-taking/reflection, resilience and burnout detection/mitigation, confidence/personal accomplishment, relevance to work, and pedagogical skills. A median of 90.5% of participants agreed or strongly agreed that the program had positive outcomes. Qualitative evaluation identified high participant satisfaction and improvement in relationship-building, empathy, perspective-taking/reflection, resilience and burnout detection/mitigation, confidence and personal accomplishment, narrative competence, relevance to work, pedagogical skills, ethical inquiry, cultural competence, and institutional impact.

### Conclusion

Evaluation suggests that narrative medicine programming leads to high participant satisfaction and positive outcomes across various competencies. The authors suggest best practices and innovative future directions for the implementation and evaluation of narrative medicine programs.

## Content and Outcomes of Narrative Medicine Programs: A Systematic Review of the Literature through 2017

### Article Summary

#### Strengths and Limitations of this Study

- The inclusion criteria based record eligibility upon the scope, participants, and educational activities of narrative medicine programming implemented within academic health sciences worldwide through 2017.
- The research strategy involved creating and executing optimized searches of five major electronic databases—PubMed, Embase, PsycINFO, ERIC, and MedEdPORTAL—and generated 1,264 records after the removal of duplicates.
- Data analysis was accomplished through independent screening by members of the research team, resulting in the selection of forty programs for inclusion in the systematic review.
- Program information related to scope, participants, educational activities, and evaluation design/methods was thematically coded to facilitate data analysis; some degree of subjectivity was inevitable due to the complexities inherent to synthesizing mixed data from educational evaluations utilizing varying methodologies.
- Evaluation designs and methods were examined for rigor and well-described quantitative and qualitative outcomes were investigated to examine participant satisfaction and learning, with qualitative studies highlighting a more nuanced breadth of outcomes regarding personal and professional benefits for participants.

## Content and Outcomes of Narrative Medicine Programs: A Systematic Review of the Literature through 2017

### Introduction

Narrative medicine (NM) is a framework for medicine and health sciences that values individuals' stories and experiences as integral aspects of the lived experience of health and illness. Historically, the fields of knowledge associated with medicine/science and narrative/humanities were more integrated until about the nineteenth century.<sup>1</sup> Likewise, the proliferation of specialization within medicine is a relatively modern conceptualization that has necessitated advanced technical training, leaving less space in educational curricula for the cultivation of humanistic disciplines.<sup>2</sup> Significantly, whereas the recommendations of the 1910 Flexner Report<sup>3</sup> pertaining to science-focused pre-medical and medical curricula reform have been heeded, its implications related to the importance of broader, humanities-focused training for aspiring physicians have gone largely neglected.<sup>4,5</sup> However, with the rapid evolution of twentieth-century medical technology, educational paradigms must shift to prepare well-rounded clinical and research professionals.<sup>4,6,7</sup> In contemporary healthcare models, which sometimes fail to deliver holistic, patient-centered care, the core tenets of NM have emerged as a means of enhancing clinical care and promoting wellness.

Scholarly discussion of literature and medicine surfaced in academic literature in the 1970s.<sup>8</sup> By 1995, one third of American medical schools had incorporated literature courses into their curricula.<sup>9</sup> Rita Charon introduced the term *narrative medicine* into the medical lexicon in 2001.<sup>8,10,11</sup> NM continues to evolve as a framework for healthcare based on Charon's assertion that: "The effective practice of medicine requires narrative competence, that is, the ability to acknowledge, absorb, interpret, and act on the stories and



## Content and Outcomes of Narrative Medicine Programs: A Systematic Review of the Literature through 2017

plights of others. Medicine practiced with narrative competence, called *narrative medicine*, is proposed as a model for humane and effective medical practice.”<sup>11</sup>

The integration of narrative and medicine offers benefits to healthcare providers as well as to patients, since the NM framework draws upon literature’s unique ability to augment clinical competencies, enhance the moral imagination, and foster interpersonal understanding.<sup>9,12</sup> Narrative-based education shows promise for promoting communication,<sup>13</sup> cultural competence,<sup>14</sup> empathy,<sup>15-17</sup> and professionalism,<sup>18</sup> as well as for enhancing vitality and mitigating burnout.<sup>19-21</sup> To reap the benefits associated with NM, many academic medical institutions have implemented humanities-based educational initiatives into the curricula.<sup>22</sup> Most NM programs utilize a combination of activities, including reading literary narratives, participating in group discussion, engaging in writing exercises, workshopping peer narratives, interviewing patients, and creating portfolios.

To date, however, few studies exist that examine and interpret efficacy trends in NM programming as a whole, nor does the current literature assess overarching unmet needs. We report a systematic review of the objectives, contents, and evaluation outcomes of existing NM programs as a means of answering the research question: how effective is the implementation and evaluation of NM programs in academic medicine and health sciences? We also provide best-practice recommendations and new directions for future narrative-based programming.

Three prior systematic reviews have considered specific aspects of NM. Barber and Moreno-Leguizamon examined whether NM education fosters compassionate care for

## Content and Outcomes of Narrative Medicine Programs: A Systematic Review of the Literature through 2017

adult patients.<sup>23</sup> Chen and Forbes concluded that reflective writing—one component of NM—may enhance empathy in medical students and thus could warrant inclusion in medical school curricula.<sup>24</sup> Fioretti et al. focused on the experience of patients and their caregivers through a lens of NM and indicated a need for clarity and specificity in NM research protocols.<sup>25</sup>

To our knowledge, no systematic review has addressed the overall effectiveness of NM programs offered to healthcare professionals and implemented in academic health sciences centers, including medical schools and hospitals. We sought to identify areas in which innovative NM programming may meet existing needs for both clinicians and biomedical researchers at all career stages, including students, residents, clinical and research fellows, and faculty. In addition, we identified areas for improvement in the reporting of the design and evaluation of NM programs.

### Methods

#### Criteria for selecting studies for this review

To be eligible for inclusion in the systematic review, a record had to document NM programming implemented within academic health sciences. We excluded articles, abstracts, commentary, or perspective pieces focused exclusively on NM theory.

Record eligibility also was contingent on the constituencies to which NM programming was offered. We considered a broad target audience consisting of one or more of the following: 1) graduate medical, dental, or health sciences students, including candidates for

## Content and Outcomes of Narrative Medicine Programs: A Systematic Review of the Literature through 2017

MD, DMD, PhD, MS, and MPH degrees; 2) undergraduate or graduate nursing and allied health students; 3) medical, dental, nursing, or health sciences trainees, including residents, clinical fellows, and research fellows; 4) nurses; 5) allied health professionals; 6) faculty in the medical, dental, and health sciences; and 7) non-faculty physicians.

A third inclusion criterion involved the educational components of NM training. The history of literature and medicine is grounded in both literary analysis and narrative writing,<sup>9</sup> although some scholars consider reflective/creative writing to be a relatively recent addition to NM programming.<sup>8</sup> Nevertheless, writing is a singularly effective means of fostering reflection.<sup>26</sup> Therefore, we specified that, to be eligible for the systematic review, NM trainings had to include **both** essential components of NM imbedded in the programmatic core: 1) textual analysis/close reading of published literature (e.g. poetry, fiction, creative non-fiction) and 2) creative/reflective writing.

### Search methods for identification of studies

We consulted the Boston University School of Medicine Assistant Director of Library and Information Management Education to design a search strategy for the systematic review. Our information sources included five major databases: PubMed, Embase, PsycINFO, ERIC, and MedEdPORTAL. PubMed—an online repository of the US National Library of Medicine, National Institutes of Health—is home to over 29 million citations in the realm of biomedical literature. Likewise, Embase indexes significant biomedical literature from across the globe. PsycINFO, the expansive database of the American Psychological Association, focuses on up-to-date behavioral and social science research. ERIC represents

## Content and Outcomes of Narrative Medicine Programs: A Systematic Review of the Literature through 2017

the U.S. Department of Education's Institute of Education Sciences online research library. MedEdPORTAL is a database of program curricula provided by the Association of American Medical Colleges. Strategies were optimized for each database to make the best use of that resource's specific Controlled Vocabulary or preferred search syntax. This is a best practice endorsed by and documented in the *Cochrane Handbook for Systematic Reviews for Interventions*.<sup>27</sup> The databases were searched in their entirety through the end of 2017. A table documenting our electronic search strategy is presented in **Supplemental Digital Appendix 1**.

### Data collection and analysis

We assessed the records identified during the literature search using a two-round, iterative process to reach consensus on eligibility (**Figure 1**),<sup>28</sup> independently screening the 1,264 record abstracts after the removal of duplicates. If an abstract was unavailable, the article text was consulted when possible. To be considered eligible, records had to meet all inclusion criteria. Based on the first round of screening, 125 records qualified for full-text assessment.

During the second screening stage, we read the full texts of records, identifying a further 80 records to exclude due to our discovering upon full text review that they did not meet our established eligibility criteria (**Figure 1**). Following the full-text screening, 45 records qualified for review.<sup>14,21,29-69</sup> However, we discovered that several qualifying records addressed identical NM programming efforts at the same institution: that is, 10 records<sup>14,21,37,38,40-44,66</sup> represented 5 programs. We considered programs represented by more than

## Content and Outcomes of Narrative Medicine Programs: A Systematic Review of the Literature through 2017

one publication type together, thus resulting in 40 unique NM programs being included in the systematic review.

We performed the data collection independently, analyzing the 40 eligible programs to identify significant information and classifying relevant data for assessing the overall effectiveness of NM in academic medical centers. We then cross-checked our results for reliability. Initially, we extracted verbatim data according to date(s) of publication; institution type; geographic location; participant information; program goals, scope, and activities; evaluation methods (**Table 1**); well-described evaluation outcomes (**Table 2, Supplemental Digital Appendix 2**); and evaluation competencies (**Table 3**). We coded and synthesized the verbatim data regarding program context, design, goals, and evaluation according to broad themes (**Supplemental Digital Appendix 3**).

Since we were particularly interested in identifying the outcomes, as well as the curricular content and goals of NM education, we paid special attention to categorizing evaluation methodology used for assessing program evaluations. We classified programs according to whether or not they were evaluated, and then differentiated the evaluated programs according to evaluation design and method. We stratified program evaluation based on the type of methods used (qualitative versus quantitative), the thoroughness of the description of the evaluation, including whether the methods and analysis strategy were discussed, and results reported.

In regards to evaluation design, programs were categorized as: 1) cross-sectional, including all programs with post-program evaluation without a comparator; 2) controlled or

## Content and Outcomes of Narrative Medicine Programs: A Systematic Review of the Literature through 2017

1  
2  
3  
4 uncontrolled pre-post test, including all programs that included both a pre-test and a post-  
5  
6 test; and 3) randomized step-wedge design, including all programs that used a step-wedge  
7  
8 design to examine program impact on participants randomized to participate at different  
9  
10 time points. We were open to including other evaluation designs, but only the three designs  
11  
12 discussed here emerged from our analysis of the NM programs included in the systematic  
13  
14 review.  
15  
16

17  
18  
19 In addition to tracking overall evaluation strategies, we used grounded analysis to analyze  
20  
21 the extracted data. Hence, program goals did not necessarily map neatly onto actual  
22  
23 outcomes. We recorded the well-described evaluation of specific NM-related competencies  
24  
25 according to the following thematic groupings: participant satisfaction, relationship-  
26  
27 building, empathy, perspective-taking and reflection, resilience and burnout  
28  
29 detection/mitigation, confidence/personal accomplishment, narrative competence,  
30  
31 relevance to work, pedagogical skills, ethical inquiry, cultural competence, and  
32  
33 institutional impact. Attentive listening practices are included in the relationship building  
34  
35 and narrative competence thematic groupings.  
36  
37  
38  
39  
40

## Results

### Descriptive Statistics

41  
42  
43  
44 **Table 1** summarizes the descriptive statistics of all 40 programs included in our review.  
45  
46

47  
48 The programs included in our review were documented and disseminated through a variety  
49  
50 of media, including articles (n=25), abstracts (n=13), *MedEdPORTAL* curricula (n=4),  
51  
52  
53  
54  
55  
56  
57  
58

## Content and Outcomes of Narrative Medicine Programs: A Systematic Review of the Literature through 2017

1  
2  
3  
4 unpublished theses (n=2), and a book chapter (n=1). Publication dates were from 2005 to  
5  
6  
7 2017, with the median year of publication being 2014.

8  
9  
10 NM programming efforts reported in the literature were concentrated in relatively high-  
11  
12 resource settings. The bulk of trainings occurred in North America (n=32, 80.0%),  
13  
14 followed by Europe (n=5, 12.5%), Asia (n=2, 5.0%), and South America (n=1, 2.5%). See  
15  
16 **Supplemental Digital Appendix 4** for a map of NM program locations.

17  
18  
19  
20 NM program participants and size varied. Programming was offered for medical students  
21  
22 (n=19, 47.5%), faculty and non-faculty physicians (n=15, 37.5%), resident and fellow  
23  
24 clinical trainees (n=13, 32.5%), other staff (n=7, 17.5%), nurses and nursing students (n=6,  
25  
26 15%), and other students (n=2, 5.0%). Some programs were open to more than one of the  
27  
28 above constituencies. Numbers of participants ranged from 5 to 350 individuals (median,  
29  
30 26; Q1-Q3, 13-48); for 10 programs, participant constituency, and/or numbers were not  
31  
32 provided.  
33  
34  
35  
36

37  
38 The number of sessions offered by NM programs was highly heterogeneous, running the  
39  
40 gamut from a single workshop or seminar to as many as 40 half-hour sessions offered over  
41  
42 the course of a year.<sup>48</sup> The median number of sessions offered was 4 (Q1-Q3: 3-9). The  
43  
44 number of hours of programming offered was similarly highly variable, ranging from 1 to  
45  
46 60, with 9 being the median (Q1-Q3: 3-20).  
47  
48

49  
50 NM programs specified one or several educational objectives related to both narrative and  
51  
52 clinical/medical skills. We grouped programmatic goals involving narrative skills into  
53  
54 several categories, including the cultivation of reflection (n=17, 42.5%); communication,  
55  
56  
57  
58

## Content and Outcomes of Narrative Medicine Programs: A Systematic Review of the Literature through 2017

attentive listening, and narrative competence (n=15, 37.5%); empathy (n=13, 32.5%); resilience and burnout detection and/or reduction (n=7, 17.5%); cultural competence (n=3, 7.5%); wellness (n=3, 7.5%); narrative skills for pedagogy (n=2, 5%); and writing (n=2, 5%). Programmatic goals related to clinical/medical skills sought to employ NM to foster clinical competence (n=13, 32.5%); enhanced sense of professionalism and vocation (n=11, 27.5%); and successful medical team functioning (n=5, 12.5%).

In order to achieve the stated programming goals, NM curricula relied on a combination of activities, including group discussion, typically based on literary readings (n=34, 85.0%); writing exercises (n=32, 80%); sharing and/or workshopping participants' writing (n=25, 62.5%); reading together as a group (n=23, 57.5%); and other narrative-based exercises (n=15, 37.5%), such as conducting patient interviews and writing patients' stories, creating portfolios, participating in an online forum, and even—in two instances—presenting a play.

### NM Program Evaluation

The reporting of NM program evaluations varied across programs and publication types. Ten programs did not report any evaluation activities. For programs reporting quantitative evaluations, we identified seven as well described and eight that reported some quantitative methods but were not thoroughly described. Programs were deemed as “not well described” if they did not include full details regarding evaluation methods. See **Table 2** for explanations for programs deemed as well defined; incomplete quantitative and qualitative program evaluations are recorded in **Supplemental Digital Appendix 5**. For



## Content and Outcomes of Narrative Medicine Programs: A Systematic Review of the Literature through 2017

1  
2  
3  
4 programs reporting qualitative evaluations, we identified 22 as well described and four that  
5  
6 were not described thoroughly. Only three NM programs were deemed as having both  
7  
8 quantitative and qualitative evaluation methods that were well described.<sup>45,47,51</sup>  
9  
10

11  
12 Evaluation designs varied across NM programs and included the use of cross-sectional  
13  
14 designs, pre-post designs, and randomized step-wedge designs. Of the evaluations we  
15  
16 identified as well described, twenty-five evaluations used a cross-sectional design with a  
17  
18 post-test only. Of the evaluations utilizing a cross-sectional design, most had only an  
19  
20 immediate post-test (n=22), one had an immediate post-test and a long-term post-test (1.5  
21  
22 years later),<sup>29</sup> and one had a long-term post-test only (1.5 year).<sup>70</sup> One evaluation did not  
23  
24 report the timing of the post-test.<sup>48</sup> Of the three evaluations that used a pre-post design, two  
25  
26 did a pre-test and immediate post-test, and one did a pre-test and long-term post-test (1  
27  
28 year).<sup>21,66</sup> One evaluation used a randomized step-wedge design in which participants were  
29  
30 randomized into two groups, and the groups participated in the program at different  
31  
32 times.<sup>37,38</sup> Post-tests of program participants were compared to pre-tests of those who had  
33  
34 not yet participated in the program.  
35  
36  
37  
38  
39

40  
41 Overall, the evaluations demonstrated that NM programming can have a variety of positive  
42  
43 impacts on healthcare providers (**Tables 2 and 3**). Quantitative evaluations provide  
44  
45 evidence for modest gains in areas related to pedagogy, empathy, and perspective-taking;  
46  
47 whereas qualitative evaluations identified gains related to confidence, relevance of work,  
48  
49 institutional impact, pedagogy, relationship-building, perspective-taking and reflection,  
50  
51 resilience and burnout detection or mitigation, narrative competence, cultural competence,  
52  
53 ethical inquiry, and increased sense of personal accomplishment (**Tables 2 and 3**). In  
54  
55  
56  
57  
58  
59  
60

## Content and Outcomes of Narrative Medicine Programs: A Systematic Review of the Literature through 2017

1  
2  
3  
4 addition to evaluating the impact of the program on participants, many evaluation  
5  
6 strategies focused on evaluating participants' satisfaction of the program. NM satisfaction  
7  
8 scores were reported to be high, with the combined percent agree or strongly agree to the  
9  
10 satisfaction measures as 93.6% (our calculation). However, satisfaction outcomes were not  
11  
12 necessarily indicative of subsequent changes in the behavior or experiences of health  
13  
14 sciences professionals who engaged in the programming.  
15  
16

17  
18  
19 Of quantitative programs deemed as well described, four reported high satisfaction,<sup>45,47,59,65</sup>  
20  
21 while modest and positive but not statistically significant impacts were reported on:  
22  
23 pedagogical skills (n=1),<sup>34</sup> relevance to professional work (n=1),<sup>59</sup> resilience and burnout  
24  
25 detection/mitigation (n=1) , and confidence/increased sense of personal accomplishment  
26  
27 (n=2).<sup>21,34,66</sup> Programs that reported statistically significant programmatic impacts  
28  
29 examined increased empathy (n=2),<sup>21,51,66</sup> and increased perspective-taking/reflection  
30  
31 (n=1).<sup>21,66</sup>  
32  
33  
34  
35

36  
37 Of qualitative programs deemed as well described, 8 reported high  
38  
39 satisfaction,<sup>37,38,40,41,54,65,67,68,71</sup> while positive impacts were reported on: relationship-  
40  
41 building (n=11),<sup>14,33,35,36,39-42,45,48,61,69,70</sup> empathy (n=7),<sup>14,42,45,48,51,60,69,70</sup> perspective-  
42  
43 taking/reflection (n=5),<sup>14,33,35,36,39,42,45,60,69,70</sup> resilience and burnout detection/mitigation  
44  
45 (n=4),<sup>35,46,48,70</sup> narrative competence (n=3),<sup>37,38,40,41,45</sup> confidence/personal accomplishment  
46  
47 (n=2),<sup>29,36</sup> ethical inquiry (n=2)<sup>45,60</sup> relevance to work (n=1),<sup>29</sup> pedagogical skills (n=1),<sup>33</sup>  
48  
49 cultural competence (n=1),<sup>14,42</sup> and institutional impact (n=1).<sup>33</sup> The qualitative studies  
50  
51 highlighted a more nuanced breadth of outcomes regarding personal and professional  
52  
53 benefits for participants in NM programs.  
54  
55  
56  
57  
58  
59

## Content and Outcomes of Narrative Medicine Programs: A Systematic Review of the Literature through 2017

We observed that the stated goals of NM programs were not always reflective of the reported evaluation outcomes. Programs identified a variety of goals, but a striking number did not report actual evaluation results (n=9)<sup>30,49,50,52,55-58,72</sup> or only discussed general participant satisfaction (n=6).<sup>47,54,65,67,68,73</sup> We found the evaluation methods and outcomes of many programs to be insufficiently developed or described.

### Discussion

Our review of 40 NM programs demonstrated modest but positive varied benefits related to narrative-based education for health science professionals, reflective of the remarkable diversity of the trainings implemented. From a geographical perspective, the bulk of programs took place in North America, followed by Europe. Audiences varied, but the highest concentration of programs were targeted at medical students, followed by trainees (residents and fellows), and then faculty and non-faculty physicians. Program goals encompassed a range of narrative and clinical skills. Program activities tended to concentrate on reading and discussion, as well as on reflective writing exercises.

Most evaluation designs utilized a cross-sectional, post-test only evaluation, which did not allow evaluators to understand the relative impact of the program. Only seven programs compared participants before and after the NM training, using either a pre-post or step-wedge design. Only four programs evaluated the long-term impact of the training, with post-program evaluations conducted between one month and one and a half years after program completion. The majority of programming was evaluated by qualitative, quantitative, or mixed methods for satisfaction and/or efficacy. Despite an emphasis on the

## Content and Outcomes of Narrative Medicine Programs: A Systematic Review of the Literature through 2017

value of writing, no programs used an evaluation deemed to be well described to assess gains in writing competence/confidence, and a surprisingly high number (n=10, 25%) of NM programs provided no details regarding evaluation design or methodology.

Whereas previous systematic reviews have concluded that NM education may be beneficial in contributing to the delivery of compassionate care<sup>23</sup> and that reflective writing may help to enhance empathy in medical students,<sup>24</sup> our research builds upon the current literature to reveal a broad range of NM benefits. Our findings demonstrate that NM has shown potential for enhancing communication and team-building skills; encouraging perspective-taking and reflection; promoting empathic behavior; detecting/mitigating burnout; cultivating narrative competence; augmenting pedagogical skills, and fostering ethical inquiry.

Based on our analysis and interpretation of the programs reviewed, we recommend considering the inclusion of narrative-based education in curricula for medical/health sciences students, trainees, and faculty. We also suggest several best practices and new directions for future NM programming efforts as a means of increasing intervention efficacy and providing broader accessibility.

### **Recommended Best Practices and Future Directions for NM**

#### *Enhanced Program Evaluation Methods*

Our research has noted that a substantial number of NM programs did not report any evaluation activities, while others only evaluated general participant satisfaction. Further,

## Content and Outcomes of Narrative Medicine Programs: A Systematic Review of the Literature through 2017

in programs that were evaluated, evaluation design was highly variable, with the majority lacking assessment of long-term impact. Without carefully evaluating the short- and long-term outcomes of educational programming for gaining particular skills and competencies, it is difficult to continue assessing accurately whether NM programming addresses the unique needs of health sciences professionals in academic medicine and health sciences. Given the intense time constraints of the constituency, we submit that program evaluation is critical to ensure that time spent in a NM program is used effectively.

Quantifying the long-term impact of NM objectives, such as fostering empathy and ethical decision-making, is challenging—and certainly complicates the integration of NM training into continuing medical education curricula.<sup>74</sup> Nevertheless, education experts contend that medical ethics and humanities training, including narrative-based reasoning, is fundamental to the professional development of healthcare practitioners.<sup>75</sup> Ensuring the integration of relevant NM programming into educational curricula for the next generation of health sciences professionals requires strategic planning, thorough evaluation, and ongoing analysis. We have constructed a basic checklist for developing, implementing, evaluating, and disseminating a NM training, regardless of individualized program focus (**Supplemental Digital Appendix 6**).

### *Focus on Narrative Writing Skills*

Narrative writing has the potential to leverage storytelling as an aspect of personal and professional growth. The literature supports that faculty writing groups and workshops can promote publications and presentations,<sup>76-78</sup> improve writing skills,<sup>77,79</sup> and bolster

## Content and Outcomes of Narrative Medicine Programs: A Systematic Review of the Literature through 2017

confidence in writing.<sup>77,78,80</sup> However, we identified only one NM intervention that reported the development of writing skills as a program goal,<sup>30</sup> rather than the use of writing as a means towards achieving other stated outcomes, such as the cultivation of reflection or empathy skills. While no program reported evaluation of writing-related competencies in a manner deemed well-described, two programs reported that participants valued the opportunity to improve writing skills<sup>54</sup> and augment self-efficacy in writing/leading writing exercises.<sup>34</sup>

NM programming that includes training in writing competencies and self-efficacy represents an innovative educational model for accomplishing both the traditional goals of NM—e.g. empathy, communication, professionalism, resilience—and the additional outcome of fostering writing competencies. We recommend expanding future NM program objectives to include the development of enhanced writing skills and self-efficacy related to the writing process as measurable learning outcomes. Such a goal may be accomplished through a blend of expert-led instruction in literary theory, close reading of published literary texts, and workshopping of peer narratives, with the goal of coaching faculty to generate perspective pieces, advocacy narratives, creative writing projects, and educational texts for submission to peer-reviewed journals.

### *NM for Scientists*

To date, a dearth of research exists regarding the occurrence and effectiveness of NM programming for scientists, and we submit that this knowledge gap should be addressed by the implementation and evaluation of narrative-based education for this constituency. The

## Content and Outcomes of Narrative Medicine Programs: A Systematic Review of the Literature through 2017

NM programs analyzed in the current review were overwhelmingly geared toward clinical professionals, including physicians, nurses, clinical fellows, residents, medical students, and clinically-oriented staff. However, many of the programs' positive outcomes may be equally valuable for research faculty, postdoctoral fellows, and graduate students in the health sciences, who may benefit from narrative-based training to enhance communication and relationship-building skills, writing and teaching competencies, cross-cultural awareness, understanding of ethical inquiry and behavior, cross-disciplinary understanding, and professional identity formation.

While much attention has been given to clinician stress and burnout, NM also may prove beneficial for researchers navigating the stressors of a historically challenging funding climate. The inclusion of both clinical and research-focused professionals in NM programming has potential to foster interdisciplinary understanding, build affinity, and offer collaborative opportunities to groups who tend to operate in silos.

### *NM for Detecting and Mitigating Burnout*

Given current concerns surrounding stress and burnout among professionals in medicine and health sciences<sup>81-86</sup> a need exists to identify and implement sustainable programming for cultivating resilience. Six programs evaluated the impact of NM education on resilience and burnout detection and/or mitigation.<sup>21,35,46,48,66,70</sup> While in one case quantitative evaluations of burnout after an NM training did not demonstrate statistical significance,<sup>67</sup> other programs suggested positive results regarding the use of NM for burnout identification and reduction.

## Content and Outcomes of Narrative Medicine Programs: A Systematic Review of the Literature through 2017

Although NM programs offer a promising initial step towards employing narrative-based education for resilience, additional research is needed to demonstrate the potential impact of NM education on physician and scientist wellness, particularly in specialties and contexts with high burnout rates. While preliminary studies have explored how narrative practice and reflective practice may be an effective intervention for front-line medical responders working in the burnout-prone context of international humanitarian frameworks,<sup>87,88</sup> reports on research, development, and implementation of NM programming for such constituencies are scarce. Therefore, we suggest further development and evaluation of narrative-based education focused on burnout detection and mitigation—with the potential for adapting successful NM programming to burnout-prone health care contexts beyond academic medicine, including among humanitarian and military front-line medical providers.

### *NM for Cultural Competence*

Several programs included in our review expressed increased cultural competence, communication and/or sensitivity as primary or secondary goals.<sup>14,42,54,60,62</sup> Given the power of literature for developing empathy<sup>89</sup> and expanding the moral imagination,<sup>9</sup> it is probable that NM programming could serve a unique role in fostering cultural sensitivity and illuminating unconscious bias, particularly since literature has been posited as a powerful vehicle for exploring themes of racial justice within medicine.<sup>90</sup> We therefore recommend additional research into NM education as a vehicle for promoting cultural competence,<sup>91</sup> which might be accomplished in a variety of ways, including by imbedding



## Content and Outcomes of Narrative Medicine Programs: A Systematic Review of the Literature through 2017

narrative-based learning modules into unconscious bias trainings already taking place within academic health sciences.

### *NM for Low-Resource Settings*

From a global perspective, NM programming efforts to date have been based primarily in high-resourced medical areas. There are opportunities for educational partnerships among institutions located in disparate geographic and socioeconomic settings both within the United States and abroad. Certainly the appearance of NM programming worldwide demonstrates a burgeoning global interest in the field, with 20.0% of training having been implemented outside the United States in recent years: Nepal in 2009,<sup>63</sup> the United Kingdom in 2010,<sup>39</sup> Canada and Chile in 2012,<sup>37,38,65</sup> France in 2013,<sup>47</sup> Italy in 2014,<sup>61</sup> Germany and Portugal in 2016,<sup>57,68</sup> and Iran in 2017.<sup>69</sup>

The increasing interest in NM education on a global level, including in some lower-resource settings, offers potential for development of scalable curricula that can be shared with resource-limited locations where humanities and medicine training curricula may still be scarce, as was reported to be the case in Nepal.<sup>63</sup> One potential strategy for implementing NM programming in lower-resource settings would be to create curricula for blended online and in-person educational modules. This type of program could leverage videoconferencing technology to connect first-time course implementers with more experienced facilitators located in higher-resource settings, allowing for peer mentoring using NM as both a healthcare framework and an educational tool.

## Content and Outcomes of Narrative Medicine Programs: A Systematic Review of the Literature through 2017

### Limitations

We acknowledge several limitations to our systematic review. First, thirteen (29%) qualifying records were abstracts, which by nature provide far less information than articles, curricula, unpublished theses, or book chapters. Second, our results are inevitably subject to potential publication bias, since programs with positive results are more likely to have been submitted and selected for publication. While the NM records made little mention of negative or neutral aspects of NM programming, such factors undoubtedly exist, including institutional funding limitations, faculty unfamiliarity, and participant time constraints. Furthermore, we noted the stated definition of NM to be inconsistent even within publications/programs that met our inclusion criteria, a factor which may have led to some lack of consistency within reports of program objectives, evaluations, and outcomes.

We recognize the inevitable complexities and potential pitfalls of synthesizing mixed data from educational evaluations that have utilized varying methodologies.<sup>92</sup> In particular, given our reliance on qualitative analysis when synthesizing the data, there is inevitably some element of subjectivity involved in data reporting and interpretation. Although we have made a good faith effort in our work, we do recognize that a degree of subjectivity is inevitable.

Finally, while we have provided discussion regarding ways in which the general thematic schema of NM program effectiveness may be transferable to future educational efforts, we nevertheless are aware that it is unclear how transferable the results of any specific program

## **Content and Outcomes of Narrative Medicine Programs: A Systematic Review of the Literature through 2017**

may be, since many dimensions influence the impact of NM programming, including the unique participants, facilitator, curriculum, and frequency/duration of sessions. To a great extent, however, this challenge supersedes NM and remains ubiquitous to medical education as a whole.

### **Conclusion**

Despite being a relative newcomer to contemporary medical education, NM programs already have resulted in a range of positive outcomes for health sciences professionals, including enhancing narrative competence, communication, and empathy; detecting and mitigating burnout; fostering reflection with regard to professional identity formation; promoting team-building; and facilitating teaching competencies. There are doubtless institutional barriers to overcome in implementing NM programming, including obtaining sufficient institutional or outside funding, augmenting conceptual understanding with medical education committees regarding the positive outcomes of narrative-based education, and providing protected time for faculty/trainee participation in NM curricula. Nevertheless, NM education shows promise for addressing some of the most pressing concerns for today's health sciences professionals, including high suicide rates, depression, and burnout compounded with declining research funding, shorter patient visit times, mounting paperwork, and decreased job satisfaction. Such challenges necessitate innovative solutions—and NM may prove to be a highly resource-effective solution.

### **Implications for Research**

We advise that NM programming best practices and future directions should include the

**Content and Outcomes of Narrative Medicine Programs:  
A Systematic Review of the Literature through 2017**

1  
2  
3  
4 use of robust evaluation mechanisms; inclusion of writing training as an additional  
5  
6 learning outcome; and the development and implementation of NM for researchers,  
7  
8 burnout-prone providers/contexts, cultural competence trainings, and lower-resource  
9  
10 settings. We hope our systematic review helps to further the integration of narrative-based  
11  
12 education into curricula at all levels in academic health sciences with a view toward  
13  
14 nurturing resilient, reflective, and emotionally intelligent professionals who, in turn, will  
15  
16 provide better patient care, health sciences education and research, and public health.  
17  
18  
19  
20  
21  
22  
23  
24  
25  
26  
27  
28  
29  
30  
31  
32  
33  
34  
35  
36  
37  
38  
39  
40  
41  
42  
43  
44  
45  
46  
47  
48  
49  
50  
51  
52  
53  
54  
55  
56  
57  
58  
59  
60

## Content and Outcomes of Narrative Medicine Programs: A Systematic Review of the Literature through 2017

### Tables

**Table 1:** Descriptive Statistics of 40 Programs in Narrative Medicine Systematic Review

| <b>Publication Year</b>                                                                    | 2014 [2011-2016] <sup>a</sup> |
|--------------------------------------------------------------------------------------------|-------------------------------|
| <b>Publication Type<sup>b</sup></b>                                                        |                               |
| Article                                                                                    | 25 <sup>c</sup> (55.5)        |
| Abstract                                                                                   | 13 <sup>c</sup> (28.8)        |
| Curriculum                                                                                 | 4 <sup>c</sup> (8.8)          |
| Unpublished Theses                                                                         | 2 (4.4)                       |
| Book Chapter                                                                               | 1 (2.2)                       |
| <b>Program Location</b>                                                                    |                               |
| USA/Canada                                                                                 | 32 (80.0)                     |
| Europe                                                                                     | 5 (12.5)                      |
| South/Western Asia                                                                         | 2 (5.0)                       |
| South America                                                                              | 1 (2.5)                       |
| <b>Number of Participants</b>                                                              | 26 [13-48]                    |
| <b>Constituency<sup>d</sup></b>                                                            |                               |
| Medical Students                                                                           | 19 (47.5)                     |
| Faculty/Physician Non-Faculty                                                              | 15 (37.5)                     |
| Residents/Fellows                                                                          | 13 (32.5)                     |
| Other staff (e.g. administrators, paramedical personnel, community workers)                | 7 (17.5)                      |
| Nurses/Nursing Students                                                                    | 6 (15.0)                      |
| Other students (e.g. graduate students)                                                    | 2 (5.0)                       |
| <b>Program Goals<sup>d</sup></b>                                                           |                               |
| <i><b>Narrative Goals<sup>d</sup></b></i>                                                  |                               |
| Reflection                                                                                 | 17 (42.5)                     |
| Communication/Attentive Listening/Narrative Competence                                     | 15 (37.5)                     |
| Empathy                                                                                    | 13 (32.5)                     |
| Resilience/Burnout Detection/Mitigation                                                    | 7 (17.5)                      |
| Cultural Competence                                                                        | 3 (7.5)                       |
| Wellness                                                                                   | 3 (7.5)                       |
| Narrative Skills for Pedagogy                                                              | 2 (5.0)                       |
| Writing                                                                                    | 2 (5.0)                       |
| <i><b>Clinical/Medical Skills<sup>d</sup></b></i>                                          |                               |
| Clinical Competence                                                                        | 13 (32.5)                     |
| Professionalism and Vocation                                                               | 11 (27.5)                     |
| Medical Team Functioning                                                                   | 5 (12.5)                      |
| <b>Number of Sessions</b>                                                                  | 4 [3-9]                       |
| <b>Hours in Program</b>                                                                    | 9 [3-20]                      |
| <b>Program Activities<sup>c</sup></b>                                                      |                               |
| Group Discussion                                                                           | 34 (85.0)                     |
| Writing Exercises                                                                          | 32 (80.0)                     |
| Sharing Writing/Workshop                                                                   | 25 (62.5)                     |
| Group Reading                                                                              | 23 (57.5)                     |
| Other (e.g. interviews, observations, portfolios, writing a patient's story, online forum) | 15 (37.5)                     |
| <b>Program Evaluation Methods<sup>e</sup></b>                                              |                               |
| Quantitative – Well Described                                                              | 7 (17.5)                      |
| Quantitative – Incomplete Description                                                      | 8 (20.0)                      |
| Qualitative – Well Described                                                               | 22 (55.0)                     |

## Content and Outcomes of Narrative Medicine Programs: A Systematic Review of the Literature through 2017

|                                    |           |
|------------------------------------|-----------|
| Qualitative—Incomplete Description | 4 (10.0)  |
| None/Not Specified                 | 10 (25.0) |

---

Data are median [Q1-Q3] or frequencies (%); <sup>a</sup>2 studies in the same year counted as one program; 2 studies in different years counted as two programs; <sup>b</sup>Percentages are calculated based on 45 records. <sup>c</sup>Program was represented by more than one publication type (e.g., article and curriculum); <sup>d</sup>Responses are not mutually exclusive, so percentages are over 100%; <sup>e</sup>11 studies used a mixed methods, with both qualitative and quantitative outcomes reported, so percentages are over 100%

---

For peer review only

## Content and Outcomes of Narrative Medicine Programs: A Systematic Review of the Literature through 2017

**Table 2:** Quantitative and Qualitative Well Described Evaluations of Narrative Medicine Programs in Systematic Review<sup>a</sup>

| 2A. Quantitative Evaluations – Well Described          |                          |                                                       |                                                                                                                   |    |                |                |                  |         |
|--------------------------------------------------------|--------------------------|-------------------------------------------------------|-------------------------------------------------------------------------------------------------------------------|----|----------------|----------------|------------------|---------|
| Reference                                              | New or Validated Outcome | Outcome                                               | Outcomes– Thematic Grouping                                                                                       | N  | Pre Mean (SD)  | Post Mean (SD) | Mean Change (SD) | P Value |
| <b>Quantitative Studies Using Pre-post Test Design</b> |                          |                                                       |                                                                                                                   |    |                |                |                  |         |
| Bhavaraju VL, Miller S. <sup>34</sup>                  | New                      | Confidence in writing and leading writing exercises   | <ul style="list-style-type: none"> <li>Confidence/ Personal Accomplishment</li> <li>Pedagogical Skills</li> </ul> | 12 | 3.1            | 4.2            | 1.1              | N.R.    |
|                                                        | New                      | Confidence in leading literary discussions            | <ul style="list-style-type: none"> <li>Confidence/ Personal Accomplishment</li> <li>Pedagogical Skills</li> </ul> | 10 | 3.7            | 4.4            | 0.7              | N.R.    |
|                                                        | New                      | Integration of tools gained in training into teaching | <ul style="list-style-type: none"> <li>Pedagogical Skills</li> </ul>                                              | 10 | 2.2            | 2.7            | 0.5              | N.R.    |
| Goupy F, et al. <sup>47</sup>                          | New                      | Interest of topic                                     | <ul style="list-style-type: none"> <li>Satisfaction</li> </ul>                                                    | 41 | N/A            | 1.84 (0.82)    | N/A              | N/A     |
|                                                        | New                      | Satisfaction with choice of theme                     | <ul style="list-style-type: none"> <li>Satisfaction</li> </ul>                                                    | 41 | N/A            | 2.13 (0.72)    | N/A              | N/A     |
|                                                        | New                      | Satisfaction of discussion related to theme           | <ul style="list-style-type: none"> <li>Satisfaction</li> </ul>                                                    | 41 | N/A            | 2.30 (0.62)    | N/A              | N/A     |
| Holub PG. <sup>51</sup>                                | Validated                | JSPE – Control Group                                  | <ul style="list-style-type: none"> <li>Empathy</li> </ul>                                                         | 41 | 119.10 (15.64) | 116.15 (16.15) | - 2.95 (6.77)    | 0.001   |
|                                                        | Validated                | JSPE – Treatment Group                                |                                                                                                                   | 41 | 119.28 (9.05)  | 124.48 (8.47)  | 5.10 (7.20)      |         |
| Winkel<br>AND<br>Winkel                                | Validated                | Maslach Burnout Inventory: Emotional Exhaustion       | <ul style="list-style-type: none"> <li>Resilience and burnout detection/mitigation</li> </ul>                     | 43 | N.R.           | N.R.           | - 2.0 (8.7)      | 0.12    |
|                                                        | Validated                | Maslach Burnout Inventory: Depersonalization          | <ul style="list-style-type: none"> <li>Resilience and burnout detection/mitigation</li> </ul>                     | 43 | N.R.           | N.R.           | 0.1 (4.0)        | 0.61    |
|                                                        | Validated                | Maslach Burnout Inventory: Personal Accomplishment    | <ul style="list-style-type: none"> <li>Personal accomplishment</li> </ul>                                         | 43 | N.R.           | N.R.           | 1.2 (7.1)        | 0.70    |

## Content and Outcomes of Narrative Medicine Programs: A Systematic Review of the Literature through 2017

|                                    |           |                                              |                                  |    |      |      |             |      |
|------------------------------------|-----------|----------------------------------------------|----------------------------------|----|------|------|-------------|------|
| AF, <i>et al.</i> <sup>21,66</sup> | Validated | Interpersonal Reactivity: Empathic Concern   | • Empathy                        | 43 | N.R. | N.R. | 0.76 (5.9)  | 0.01 |
|                                    | Validated | Interpersonal Reactivity: Perspective Taking | • Perspective-taking/ Reflection | 43 | N.R. | N.R. | 21.37 (7.8) | 0.01 |

### Quantitative Studies Using Post-test Design

| <i>Reference</i>                         | <i>New or Validated Outcome</i> | <i>Outcome</i>                      | <i>Outcomes– Thematic Grouping</i> | <i>N</i> | <i>% agreement with outcome</i> |
|------------------------------------------|---------------------------------|-------------------------------------|------------------------------------|----------|---------------------------------|
| Goodrich TJ, <i>et al.</i> <sup>45</sup> | New                             | Usefulness of the training          | • Satisfaction                     | 48       | 79%                             |
|                                          | New                             | Interest of the training            | • Satisfaction                     | 48       | 88%                             |
| Moss HA, <i>et al.</i> <sup>59</sup>     | New                             | Satisfaction of training            | • Satisfaction                     | 27       | 99%                             |
|                                          | New                             | Relevance of training to work       | • Relevance to work                | 27       | 97%                             |
| Walker MR, <i>et al.</i> <sup>65</sup>   | New                             | Total Satisfaction of course        | • Satisfaction                     | 32       | 89%                             |
|                                          | New                             | Appropriateness of activities       | • Satisfaction                     | 32       | 94%                             |
|                                          | New                             | Overall experience with instructors | • Satisfaction                     | 32       | 97%                             |

### 2B. Qualitative Evaluations – Well Described<sup>b</sup>

| <i>Reference</i>                                                                  | <i>Design</i>          | <i>Timing</i>              | <i>Methods</i>                            | <i>Outcome Improved – Thematic Grouping</i>                                                                  |
|-----------------------------------------------------------------------------------|------------------------|----------------------------|-------------------------------------------|--------------------------------------------------------------------------------------------------------------|
| Arntfield SL, <i>et al.</i> <sup>29</sup>                                         | Post-test              | Immediate, 1.5 years later | Open-ended surveys; focus group           | • Confidence/ Personal Accomplishment<br>• Relevance to work                                                 |
| Balmer DF, Richards BF. <sup>33</sup>                                             | Post-test              | Immediate                  | Ethnography, content analysis, interviews | • Institutional impact<br>• Pedagogical Skills<br>• Relationship-building<br>• Perspective-taking/Reflection |
| Birigwa SN, <i>et al.</i> <sup>35</sup>                                           | Post-test              | Immediate                  | Surveys                                   | • Relationship-building<br>• Resilience and burnout detection/mitigation<br>• Perspective-taking/Reflection  |
| Bobb SJ <sup>36</sup>                                                             | Post-test              | Immediate                  | Ethnography, interviews                   | • Perspective- taking/Reflection<br>• Relationship-building<br>• Confidence/Personal accomplishment          |
| Boudreau JD, <i>et al.</i> <sup>37</sup> AND Liben S, <i>et al.</i> <sup>38</sup> | Random-ized Step Wedge | Immediate                  | Interviews                                | • Narrative competence<br>• Satisfaction                                                                     |
| Brigley S, Jasper M <sup>39</sup>                                                 | Post-test              | Immediate                  | Observation, focus groups, interviews     | • Relationship-building<br>• Perspective-taking/ Reflection                                                  |



## Content and Outcomes of Narrative Medicine Programs: A Systematic Review of the Literature through 2017

|                                                                                          |           |                |                                                                                                                    |                                                                                                                                                         |
|------------------------------------------------------------------------------------------|-----------|----------------|--------------------------------------------------------------------------------------------------------------------|---------------------------------------------------------------------------------------------------------------------------------------------------------|
| Chretien KC, <i>et al.</i> <sup>40</sup> AND<br>Chretien KC, <i>et al.</i> <sup>41</sup> | Post-test | Immediate      | Focus groups, patient interviews                                                                                   | <ul style="list-style-type: none"> <li>• Narrative competence,</li> <li>• Relationship-building,</li> <li>• Satisfaction</li> </ul>                     |
| DasGupta S, <i>et al.</i> <sup>42</sup> AND<br>Dasgupta S. <sup>14</sup>                 | Post-test | Immediate      | Focus Groups, resident evaluations                                                                                 | <ul style="list-style-type: none"> <li>• Cultural competence</li> <li>• Relationship-building</li> <li>• Empathy</li> </ul>                             |
| Goodrich TJ, <i>et al.</i> <sup>45</sup>                                                 | Post-test | Immediate      | Focus Group; program evaluation survey                                                                             | <ul style="list-style-type: none"> <li>• Empathy</li> <li>• Ethical inquiry</li> <li>• Narrative competence</li> <li>• Relationship-building</li> </ul> |
| Gordon E. <sup>46</sup>                                                                  | Post-test | Immediate      | Content analysis of essays                                                                                         | <ul style="list-style-type: none"> <li>• Resilience and burnout detection/mitigation</li> </ul>                                                         |
| Goupy F, <i>et al.</i> <sup>47</sup>                                                     | Post-test | Immediate;     | Open-ended survey                                                                                                  | <ul style="list-style-type: none"> <li>• Satisfaction</li> </ul>                                                                                        |
| Gowda D, <i>et al.</i> <sup>48</sup>                                                     | Post-test | Not stated     | Observation of sessions; interviews                                                                                | <ul style="list-style-type: none"> <li>• Relationship-building</li> <li>• Resilience and burnout detection/mitigation</li> <li>• Empathy</li> </ul>     |
| Holub PG. <sup>51</sup>                                                                  | Post-test | Immediate      | Focus Groups                                                                                                       | <ul style="list-style-type: none"> <li>• Empathy</li> </ul>                                                                                             |
| Kennedy AJ, Sgro G. <sup>54</sup>                                                        | Post-test | Immediate      | Open-ended survey                                                                                                  | <ul style="list-style-type: none"> <li>• Satisfaction</li> </ul>                                                                                        |
| Murinson, B. <sup>60</sup>                                                               | Post-test | Immediate      | Content analysis of responses                                                                                      | <ul style="list-style-type: none"> <li>• Empathy</li> <li>• Ethical inquiry</li> <li>• Perspective-taking/Reflection</li> </ul>                         |
| Polvani S, <i>et al.</i> <sup>61</sup>                                                   | Post-test | Immediate      | Patient and family interviews; video recorded patient-doctor interactions, document review of letters of complaint | <ul style="list-style-type: none"> <li>• Relationship-building</li> </ul>                                                                               |
| Small, <i>et al.</i> <sup>70</sup>                                                       | Post-test | 1.5 year later | Interviews                                                                                                         | <ul style="list-style-type: none"> <li>• Relationship-building</li> <li>• Empathy</li> <li>• Resilience and burnout detection/mitigation</li> </ul>     |
| Spike J. <sup>73</sup>                                                                   | Post-test | Immediate      | Open-ended survey                                                                                                  | <ul style="list-style-type: none"> <li>• Satisfaction</li> </ul>                                                                                        |
| Walker MR, <i>et al.</i> <sup>65</sup>                                                   | Post-test | Immediate      | Open-ended survey                                                                                                  | <ul style="list-style-type: none"> <li>• Satisfaction</li> </ul>                                                                                        |
| Winkel AF, <i>et al.</i> <sup>67</sup>                                                   | Post-test | Immediate      | Questionnaire                                                                                                      | <ul style="list-style-type: none"> <li>• Satisfaction</li> </ul>                                                                                        |
| Wohlmann A, Halstein M. <sup>68</sup>                                                    | Post-test | Immediate      | Open-ended survey                                                                                                  | <ul style="list-style-type: none"> <li>• Satisfaction</li> </ul>                                                                                        |
| Zohouri M. <sup>69</sup>                                                                 | Post-test | Immediate      | Content analysis of essays                                                                                         | <ul style="list-style-type: none"> <li>• Empathy</li> <li>• Relationship-building</li> <li>• Perspective-taking/Reflection</li> </ul>                   |

1  
2  
3  
4  
5  
6  
7  
8  
9  
10  
11  
12  
13  
14  
15  
16  
17  
18  
19  
20  
21  
22  
23  
24  
25  
26  
27  
28  
29  
30  
31  
32  
33  
34  
35  
36  
37  
38  
39  
40  
41  
42  
43  
44  
45  
46  
47  
48  
49  
50  
51  
52  
53  
54  
55  
56  
57  
58  
59  
60

## Content and Outcomes of Narrative Medicine Programs: A Systematic Review of the Literature through 2017

Notes: <sup>a</sup>All Quantitative Evaluations – Well Described report evaluation at the end of the program except for Winkel and Winkel AF.<sup>21,66</sup> <sup>b</sup>See Appendix 2 for Outcomes/Findings.

For peer review only

**Content and Outcomes of Narrative Medicine Programs:  
A Systematic Review of the Literature through 2017**

**Table 3:** Competencies Evaluated in Narrative Medicine Programs in Systematic Review<sup>a</sup>

| <b>Program Evaluation Outcomes</b>                   | <b>Quantitative, Well Described (n=7)</b> | <b>Qualitative, Well Described (n=21)</b> |
|------------------------------------------------------|-------------------------------------------|-------------------------------------------|
| <b>Participant Satisfaction</b>                      | 4                                         | 8                                         |
| <b>Relationship-building</b>                         | 0                                         | 11                                        |
| <b>Empathy</b>                                       | 2                                         | 7                                         |
| <b>Perspective-taking/Reflection</b>                 | 1                                         | 5                                         |
| <b>Resilience &amp; Burnout Detection/Mitigation</b> | 1                                         | 4                                         |
| <b>Confidence/ Personal Accomplishment</b>           | 2                                         | 2                                         |
| <b>Narrative Competence</b>                          | 0                                         | 3                                         |
| <b>Relevance to Work</b>                             | 1                                         | 1                                         |
| <b>Pedagogical Skills</b>                            | 1                                         | 1                                         |
| <b>Ethical Inquiry</b>                               | 0                                         | 2                                         |
| <b>Cultural Competence</b>                           | 0                                         | 1                                         |
| <b>Institutional Impact</b>                          | 0                                         | 1                                         |

Notes: <sup>a</sup> Results of some evaluations were not well described, not mentioned, or not statistically significant. Thus, not all results in Appendix 2 are included in the descriptions of positive NM program outcomes discussed in the text of our review.

# Content and Outcomes of Narrative Medicine Programs: A Systematic Review of the Literature through 2017

## Figure Legend

**Figure 1.** Record Search and Screening Process for Narrative Medicine Systematic Review, through 2017

## PRISMA Checklist

Please see the attached PRISMA checklist.

## Acknowledgements

Not applicable.

## Authors' Contributions

Christy D. Di Frances, PhD, MA, Ellen Childs, PhD, John Carlo Pasco, MS, Ludovic Trinquart, PhD, David B. Flynn, MS(LIS), Sarah L. Wingerter, MD, Robina M. Bhasin, EdM, Lindsay B. Demers, PhD, MS, and Emelia J. Benjamin, MD, ScM have made substantial contributions to the manuscript materials as follows:

1. Engaging in the conceptualization and/or design of the work—or in the acquisition, analysis, and/or interpretation of data.
2. Drafting and/or critically revising the manuscript in regards to significant intellectual content.
3. Giving final approval to the version of the work submitted for publication.
4. Agreeing to be held accountable for all aspects of the work, including ensuring that any inquiries related to the accuracy and/or integrity of the work are appropriately investigated and resolved.

## Competing Interests/COI Disclosures & Funding

The authors have no conflicts of interest in connection with this manuscript. This research was supported by the:

- National Institutes of Health (NIH) and the Food and Drug Administration (FDA) Center for Tobacco Products (CTP) Award Numbers P50HL120163 and U54HL120163
- NIH/NHLBI Award Numbers R01 HL128914, R01 HL092577, and R01 HL126136

1  
2  
3  
4  
5  
6  
7  
8  
9  
10  
11  
12  
13  
14  
15

## Content and Outcomes of Narrative Medicine Programs: A Systematic Review of the Literature through 2017

- American Heart Association (AHA) Award Numbers 18SFRN34110082 and 18SFRN34150007
- Robert Wood Johnson Foundation: ‘Studying mHealth technologies to help people improve their health and share their health information in real time with health care providers’
- Columbia University 2018-2019 Narrative Medicine Fellowship: ‘Peer-led Narrative Medicine Workshops for First and Second Year Medical Students’ (\$2,000 awarded to BU medical student John Carlo Pasco, co-author)

16  
17  
18  
19  
20  
21  
22  
23  
24  
25  
26  
27  
28  
29  
30  
31  
32  
33  
34  
35  
36  
37  
38  
39  
40  
41  
42  
43  
44  
45  
46  
47  
48  
49  
50  
51  
52  
53  
54  
55  
56  
57  
58  
59  
60

### Data Sharing

Not applicable.

### Patient Consent

Not applicable.

### Patient and Public Involvement

Not applicable.

### Ethical Approval

Not applicable.

## Content and Outcomes of Narrative Medicine Programs: A Systematic Review of the Literature through 2017

### References

1. Bouterse J, Karstens B. A Diversity of Divisions: Tracing the History of the Demarcation between the Sciences and the Humanities. *Isis*. 2015;106(2):341-352.
2. Weisz G. The emergence of medical specialization in the nineteenth century. *Bull Hist Med*. 2003;77(3):536-575.
3. Flexner A, Pritchett HS. *Medical education in the United States and Canada; a report to the Carnegie Foundation for the Advancement of Teaching*. New York City 1910.
4. Marchalik D. The Return to Literature-Making Doctors Matter in the New Era of Medicine. *Acad Med*. 2017.
5. Riggs G. Commentary: Are we ready to embrace the rest of the Flexner Report? *Acad Med*. 2010;85(11):1669-1671.
6. Johnston SC. Anticipating and Training the Physician of the Future: The Importance of Caring in an Age of Artificial Intelligence. *Acad Med*. 2018.
7. Bosch G, Casadevall A. Graduate Biomedical Science Education Needs a New Philosophy. *MBio*. 2017;8(6).
8. Jones AH. Why teach literature and medicine? Answers from three decades. *J Med Humanit*. 2013;34(4):415-428.
9. Hunter KM, Charon R, Coulehan JL. The study of literature in medical education. *Acad Med*. 1995;70(9):787-794.
10. Charon R. Narrative medicine: form, function, and ethics. *Ann Intern Med*. 2001;134(1):83-87.
11. Charon R. Narrative Medicine: A Model for Empathy, Reflection, Profession, and Trust. *JAMA*. 2001;286(15):1897-1902.
12. Charon R, Banks JT, Connelly JE, et al. Literature and medicine: contributions to clinical practice. *Ann Intern Med*. 1995;122(8):599-606.
13. Tsai SL, Ho MJ. Can narrative medicine training improve OSCE performance? *Med Educ*. 2012;46(11):1112-1113.
14. DasGupta S. How to Catch the Story but Not Fall Down: Reading Our Way to More Culturally Appropriate Care. *Virtual Mentor*. 2006;8(5):315-318.
15. Deen SR, Mangurian C, Cabaniss DL. Points of contact: using first-person narratives to help foster empathy in psychiatric residents. *Acad Psychiatry*. 2010;34(6):438-441.
16. Chen PJ, Huang CD, Yeh SJ. Impact of a narrative medicine programme on healthcare providers' empathy scores over time. *BMC Med Educ*. 2017;17(1):108.
17. DasGupta S, Charon R. Personal illness narratives: using reflective writing to teach empathy. *Acad Med*. 2004;79(4):351-356.
18. Miller E, Balmer D, Hermann N, Graham G, Charon R. Sounding narrative medicine: studying students' professional identity development at Columbia University College of Physicians and Surgeons. *Acad Med*. 2014;89(2):335-342.
19. Wald HS, Haramati A, Bachner YG, Urkin J. Promoting resiliency for interprofessional faculty and senior medical students: Outcomes of a workshop

**Content and Outcomes of Narrative Medicine Programs:  
A Systematic Review of the Literature through 2017**

- 1  
2  
3  
4 using mind-body medicine and interactive reflective writing. *Med Teach*.  
5 2016;38(5):525-528.  
6  
7 20. Veno M, Silk H, Savageau JA, Sullivan KM. Evaluating One Strategy for  
8 Including Reflection in Medical Education and Practice. *Fam Med*.  
9 2016;48(4):300-304.  
10 21. Winkel AF, Feldman N, Moss H, Jakalow H, Simon J, Blank S. Narrative Medicine  
11 Workshops for Obstetrics and Gynecology Residents and Association With  
12 Burnout Measures. *Obstet Gynecol*. 2016;128 Suppl 1:27s-33s.  
13 22. National Academies of Sciences E, Medicine. *The Integration of the Humanities  
14 and Arts with Sciences, Engineering, and Medicine in Higher Education: Branches  
15 from the Same Tree*. Washington, DC: The National Academies Press; 2018.  
16 23. Barber S, Moreno-Leguizamon CJ. Can narrative medicine education contribute to  
17 the delivery of compassionate care? A review of the literature. *Med Humanit*. 2017.  
18 24. Chen I, Forbes C. Reflective writing and its impact on empathy in medical  
19 education: systematic review. *J Educ Eval Health Prof*. 2014;11:20.  
20 25. Fioretti C, Mazzocco K, Riva S, Oliveri S, Masiero M, Pravettoni G. Research  
21 studies on patients' illness experience using the Narrative Medicine approach: a  
22 systematic review. *BMJ Open*. 2016;6(7):e011220.  
23 26. Goyal RK, Charon R, Lekas HM, et al. 'A local habitation and a name': how  
24 narrative evidence-based medicine transforms the translational research paradigm.  
25 *J Eval Clin Pract*. 2008;14(5):732-741.  
26 27. Cochrane Handbook for Systematic Reviews of Interventions. [http://handbook-5-  
27 1.cochrane.org/](http://handbook-5-1.cochrane.org/) ], 2019.  
28 28. Moher D, Liberati A, Tetzlaff J, Altman DG, Group P. Preferred reporting items  
29 for systematic reviews and meta-analyses: the PRISMA statement. *PLoS Med*.  
30 2009;6(7):e1000097.  
31 29. Arntfield SL, Slesar K, Dickson J, Charon R. Narrative medicine as a means of  
32 training medical students toward residency competencies. *Patient Educ Couns*.  
33 2013;91(3):280-286.  
34 30. Aronson L, Schwalbe W. The art and craft of writing for self-care and narrative  
35 advocacy: A workshop in reflective and public writing. *J Pain Symptom Manage*.  
36 2015;49(2):322.  
37 31. Ball SC. Enhancing medicine subinternship through narrative medicine. *J Gen  
38 Intern Med*. 2011;26:S617.  
39 32. Balmer D, Gill A, Nuila R. Integrating narrative medicine into clinical care. *Med  
40 Educ*. 2016;50(5):581-582.  
41 33. Balmer DF, Richards BF. Faculty development as transformation: lessons learned  
42 from a process-oriented program. *Teach Learn Med*. 2012;24(3):242-247.  
43 34. Bhavaraju VL, Miller S. Faculty development in narrative medicine: using stories  
44 to teach, learn, and thrive. *J Grad Med Educ*. 2014;6(2):355-356.  
45 35. Birigwa SN, Khedagi AM, Katz CJ. Stop, look, listen, then breathe: The impact of  
46 a narrative medicine curriculum on pediatric residents. *Acad Pediatr*.  
47 2017;17(5):e40-e41.  
48  
49  
50  
51  
52  
53  
54  
55  
56  
57  
58  
59  
60

**Content and Outcomes of Narrative Medicine Programs:  
A Systematic Review of the Literature through 2017**

36. Bobb SJ. *Finding meaning and sense-making in hospital nursing teams: The promise of Narrative Medicine*. US, Marquette University 2017.
37. Boudreau JD, Liben S, Fuks A. A faculty development workshop in narrative-based reflective writing. *Perspect Med Educ*. 2012;1(3):143-154.
38. Liben S, Chin K, Boudreau JD, Boillat M, Steinert Y. Assessing a faculty development workshop in narrative medicine. *Med Teach*. 2012;34(12):e813-819.
39. Brigley S, Jasper M. Evaluation of a multidisciplinary faculty to support learning in surgical practice. *J Interprof Care*. 2010;24(4):401-411.
40. Chretien KC, Swenson R, Yoon B, Julian R, Keenan J, Kheirbek R. Storytelling with inpatients. *J Gen Intern Med*. 2014;29(1 (Supplement)):S534-S535.
41. Chretien KC, Swenson R, Yoon B, et al. Tell Me Your Story: A Pilot Narrative Medicine Curriculum During the Medicine Clerkship. *J Gen Intern Med*. 2015;30(7):1025-1028.
42. DasGupta S, Meyer D, Calero-Breckheimer A, Costley AW, Guillen S. Teaching cultural competency through narrative medicine: intersections of classroom and community. *Teach Learn Med*. 2006;18(1):14-17.
43. Elliott D, Schaff P, Woehrle T, Walsh A, Trial J. Narrative Reflection in Family Medicine Clerkship - Cultural Competence in the Third Year Required Clerkships. *MedEdPORTAL*. 2010;6(1153).
44. Schaff P. Donning the White Coat: The Narrative Threads of Professional Development. *J LearnThrough the Arts*. 2006;2(1):21.
45. Goodrich TJ, Irvine CA, Boccher-Lattimore D. Narrative Ethics as Collaboration: A Four-Session Curriculum. *Fam Syst Health*. 2005;23(3):348-357.
46. Gordon E. Echoes of burnout in internal medicine resident narrative essays. *J Gen Intern Med*. 2017;32(2):S171-S172.
47. Goupy F, Abgrall-Barbry G, Aslangul E, et al. Can narrative medicine be an answer to patient physician relationship teaching according to students' demand in medical education curricula? *Presse Med*. 2013;42(1):e1-e8.
48. Gowda D, Balmer D, Khedagi A, et al. Year-long narrative medicine intervention to improve interprofessional practice in three primary care practices. *J Gen Intern Med*. 2017;32(2):S725.
49. Heller EA, Heller FE. Narrative medicine: A practical application for using writing as a clinical intervention with cancer patients, caregivers and the clinicians that care for them. *Psycho-Oncology*. 2016;25:10.
50. Hellerstein DJ. "The City of the Hospital": On Teaching Medical Students to Write. *J Med Humanit*. 2015;36(4):269-289.
51. Holub PG. *The influence of narrative in fostering affective development of medical professionalism in an online class*. US, Nova Southeastern University; 2011.
52. Hurst M, Irvine C. Stories of the end: A narrative medicine curriculum to reframe death and dying. In: *Our changing journey to the end: Reshaping death, dying, and grief in America: New paths of engagement; New venues in the search for dignity and grace, Vols. 1-2*. Santa Barbara, CA, US: Praeger/ABC-CLIO; 2014:85-99.
53. Jacobs ZG, Sgro G. Pittsburgh narratives: A multidisciplinary workshop in narrative medicine. *J Gen Intern Med*. 2017;32(2):S697-S698.



**Content and Outcomes of Narrative Medicine Programs:  
A Systematic Review of the Literature through 2017**

- 1
- 2
- 3
- 4
- 5 54. Kennedy AJ, Sgro G. Birmingham voices: Developing narrative competency to
- 6 better serve vulnerable populations. *J Gen Intern Med.* 2016;31(2):S806.
- 7 55. Kissler MJ, Saxton B, Nuila R, Balmer DF. Professional Formation in the Gross
- 8 Anatomy Lab and Narrative Medicine: An Exploration. *Acad Med.*
- 9 2016;91(6):772-777.
- 10 56. Lane-Reticker A, Fogel C. Introducing a humanities focus into a curriculum for
- 11 midcareer HPM trainees. *J Pain Symptom Manage.* 2012;43(2):446.
- 12 57. Machado MC, Lobo Antunes J. Narrativa da Doença: Uma Disciplina Optativa na
- 13 Faculdade de Medicina de Lisboa. *Acta medica portuguesa.* 2016;29(12):790-792.
- 14 58. Mark MSJ, Todd K, Todd D. The language of illness: The art of telling, listening,
- 15 and self-care through narrative medicine. *J Pain Symptom Manage.*
- 16 2017;53(2):321-322.
- 17 59. Moss HA, Winkel AF, Jewell A, et al. Narrative medicine: Using reflective writing
- 18 workshops to help house staff address the complex and challenging nature of caring
- 19 for gynecologic oncology patients. *Gynecol Oncol.* 2014;133:73.
- 20 60. Murinson B. Pain and the humanities: exploring the meaning of pain in medicine
- 21 through drama, literature, fine arts and philosophy. *MedEdPORTAL.* 2010;6(8129).
- 22 61. Polvani S, Mammucari M, Zuppiroli A, et al. Narrative medicine, a model of
- 23 clinical governance: The experience of the Local Health Authority of Florence in
- 24 Italy. *Clinical Practice.* 2014;11(5):493-499.
- 25 62. Roy R. Teaching Cultural Sensitivity through Literature and Reflective Writing.
- 26 *Virtual Mentor.* 2007;9(8):543-546.
- 27 63. Shankar PR. A voluntary medical humanities module in a medical college in
- 28 Western Nepal: participant feedback. *Teach Learn Med.* 2009;21(3):248-253.
- 29 64. Spike J. 'On Doctoring': Essays on Professionalism. *MedEdPORTAL.* 2008;4(792).
- 30 65. Walker MR, Zúñiga D, Triviño X. Narrativa y formación docente: la experiencia de
- 31 5 años de un taller de escritura. *Revista Medica de Chile.* 2012;140(5):659-666.
- 32 66. Winkel AF. Narrative Medicine: A Writing Workshop Curriculum for Residents.
- 33 *MedEdPORTAL.* 2016;12(10493).
- 34 67. Winkel AF, Hermann N, Graham MJ, Ratan RB. No time to think: making room
- 35 for reflection in obstetrics and gynecology residency. *J Grad Med Educ.*
- 36 2010;2(4):610-615.
- 37 68. Wohlmann A, Halstein M. Narrative Medizin: Ein Pilotprojekt im Skills Lab der
- 38 Universitätsmedizin Mainz. *ZFA (Stuttgart).* 2016;92(11):456-460.
- 39 69. Zohouri M, Amini M, Sagheb MM. Fourth year medical students' reflective writing
- 40 on "Death of Ivan Ilych": a qualitative study. *J Adv Med Educ Prof.* 2017;5(2):73-
- 41 77.
- 42 70. Small LC, Feldman LS, Oldfield BJ. Using Narrative Medicine to Build
- 43 Community Across the Health Professions and Foster Self-Care. *J Radiol Nurs.*
- 44 2017;36(4):224-227.
- 45 71. J. S. Patient-Centered Medicine: Writing Your Patient's Life Story.
- 46 *MedEdPORTAL.* 2008;4(793).
- 47 72. Robeson R, King NMP. Performable Case Studies in Ethics Education. *Healthcare*
- 48 *(Basel, Switzerland).* 2017;5(3).
- 49
- 50
- 51
- 52
- 53
- 54
- 55
- 56
- 57
- 58
- 59
- 60

**Content and Outcomes of Narrative Medicine Programs:  
A Systematic Review of the Literature through 2017**

73. Spike J. Patient-Centered Medicine: Writing Your Patient's Life Story. *MedEdPORTAL*. 2008;4(793).
74. Kuper A. Literature and medicine: a problem of assessment. *Acad Med*. 2006;81(10 Suppl):S128-137.
75. Doukas DJ, McCullough LB, Wear S, Project to R, Integrate Medical Education I. Perspective: Medical education in medical ethics and humanities as the foundation for developing medical professionalism. *Acad Med*. 2012;87(3):334-341.
76. Steinert Y, McLeod PJ, Liben S, Snell L. Writing for publication in medical education: the benefits of a faculty development workshop and peer writing group. *Med Teach*. 2008;30(8):e280-285.
77. Sonnad SS, Goldsack J, McGowan KL. A writing group for female assistant professors. *J Natl Med Assoc*. 2011;103(9-10):811-815.
78. Brandon C, Jamadar D, Girish G, Dong Q, Morag Y, Mullan P. Peer support of a faculty "writers' circle" increases confidence and productivity in generating scholarship. *Acad Radiol*. 2015;22(4):534-538.
79. Pololi L, Knight S, Dunn K. Facilitating scholarly writing in academic medicine. *J Gen Intern Med*. 2004;19(1):64-68.
80. Dankoski M, Palmer M, Banks J, et al. Academic writing: Supporting faculty in a critical competency for success. *J Fac Dev*. 2012;26(2):47-54.
81. AAMC. Burnout Among U.S. Medical School Faculty. *AAMC Analysis in Brief*. 2019;19(1).
82. Zhang YY, Han WL, Qin W, et al. Extent of compassion satisfaction, compassion fatigue and burnout in nursing: A meta-analysis. *Journal of nursing management*. 2018.
83. Dugani S, Afari H, Hirschhorn LR, et al. Prevalence and factors associated with burnout among frontline primary health care providers in low- and middle-income countries: A systematic review. *Gates Open Res*. 2018;2:4.
84. Shanafelt TD, Hasan O, Dyrbye LN, et al. Changes in Burnout and Satisfaction With Work-Life Balance in Physicians and the General US Working Population Between 2011 and 2014. *Mayo Clin Proc*. 2015;90(12):1600-1613.
85. Tjebkink JK, Vergouwen AC, Smulders YM. Emotional exhaustion and burnout among medical professors; a nationwide survey. *BMC medical education*. 2014;14:183.
86. Ishak W, Nikraves R, Lederer S, Perry R, Ogunyemi D, Bernstein C. Burnout in medical students: a systematic review. *The clinical teacher*. 2013;10(4):242-245.
87. Cunningham T. *The use and role of narrative practices to mitigate compassion fatigue among expatriate health workers during the Ebola outbreak of 2013-2016*. US, Columbia University; 2017.
88. Hunt MR, Schwartz L, Sinding C, Elit L. The ethics of engaged presence: a framework for health professionals in humanitarian assistance and development work. *Dev World Bioeth*. 2014;14(1):47-55.
89. Johnson DR. Transportation into a story increases empathy, prosocial behavior, and perceptual bias toward fearful expressions. *Pers Individ Dif*. 2012;52(2):150-155.

**Content and Outcomes of Narrative Medicine Programs:  
A Systematic Review of the Literature through 2017**

- 1
- 2
- 3
- 4
- 5 90. Pasco JC, Anderson C, DasGupta S. Visionary medicine: speculative fiction, racial
- 6 justice and Octavia Butler's 'Bloodchild'. *Med Humanit.* 2016;42(4):246-251.
- 7 91. Saffran L. What Pauline Doesn't Know: Using Guided Fiction Writing to Educate
- 8 Health Professionals about Cultural Competence. *J Med Humanit.* 2017.
- 9 92. Barbour RS. Mixing qualitative methods: quality assurance or qualitative
- 10 quagmire? *Qual Health Res.* 1998;8(3):352-361.
- 11
- 12
- 13
- 14
- 15
- 16
- 17
- 18
- 19
- 20
- 21
- 22
- 23
- 24
- 25
- 26
- 27
- 28
- 29
- 30
- 31
- 32
- 33
- 34
- 35
- 36
- 37
- 38
- 39
- 40
- 41
- 42
- 43
- 44
- 45
- 46
- 47
- 48
- 49
- 50
- 51
- 52
- 53
- 54
- 55
- 56
- 57
- 58
- 59
- 60

For peer review only

**Figure 1.** Record Search and Screening Process for Narrative Medicine Systematic Review, through 2017 [Mono Image]

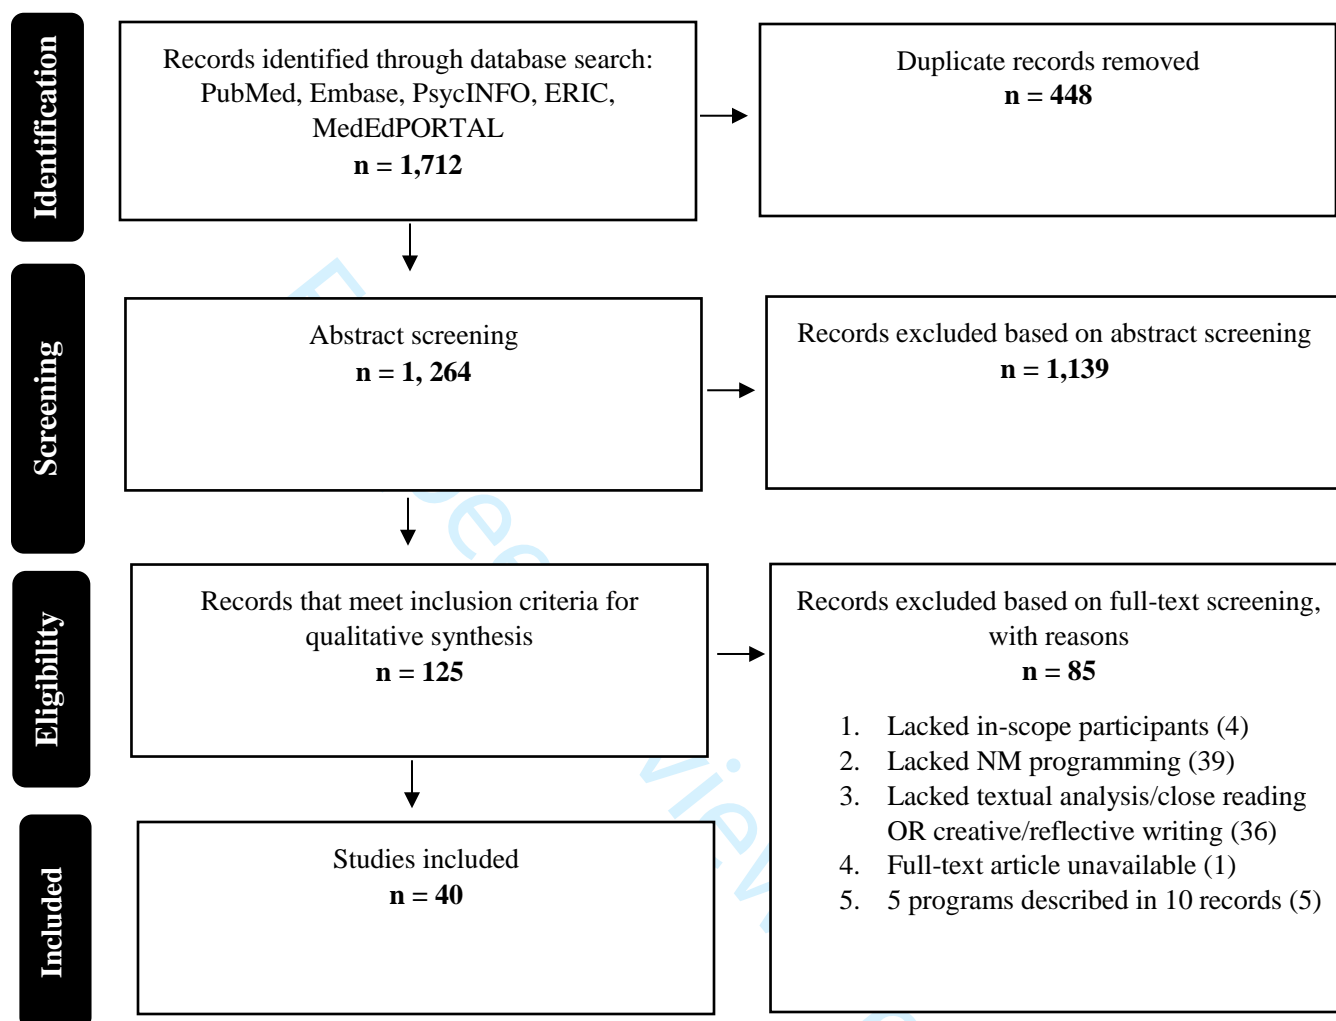

**Supplemental Digital Appendix 1.** Literature Database Search for Narrative Medicine Systematic Review, through 2017

| Database           | Search Terms                                                                   | Results | Duplicates | Original Citations |
|--------------------|--------------------------------------------------------------------------------|---------|------------|--------------------|
| <b>PubMed</b>      | “narrative medicine”[all fields] OR<br>“reflective writing”[all fields]        | 456     | 4          | 452                |
| <b>Embase</b>      | “narrative medicine”/exp OR<br>“narrative medicine” OR<br>“reflective writing” | 593     | 321        | 272                |
| <b>PsycINFO</b>    | TX narrative medicine OR TX<br>reflective writing                              | 497     | 107        | 390                |
| <b>ERIC</b>        | “narrative medicine”                                                           | 13      | 6          | 7                  |
| <b>MedEdPORTAL</b> | “narrative”                                                                    | 98      | 1          | 97                 |
| <b>MedEdPORTAL</b> | “reflective”                                                                   | 55      | 9          | 46                 |
| <b>TOTAL</b>       |                                                                                | 1,712   | 448        | <b>1,264</b>       |

**Supplemental Digital Appendix 2. Outcomes/Findings for Qualitative – Well Described Evaluations (a Supplemental to Table 2B)**

| Reference                                                            | Outcomes/Findings                                                                                                                                                                                                                                                                                                                                                                                                                                                                                                                                                    | Outcome Improved – Thematic Grouping                                                                                                                                             |
|----------------------------------------------------------------------|----------------------------------------------------------------------------------------------------------------------------------------------------------------------------------------------------------------------------------------------------------------------------------------------------------------------------------------------------------------------------------------------------------------------------------------------------------------------------------------------------------------------------------------------------------------------|----------------------------------------------------------------------------------------------------------------------------------------------------------------------------------|
| Arntfield SL, <i>et al.</i> (1)                                      | Confidence in effectiveness of future as physicians                                                                                                                                                                                                                                                                                                                                                                                                                                                                                                                  | <ul style="list-style-type: none"> <li>• Confidence/ Personal Accomplishment</li> <li>• Relevance to work</li> </ul>                                                             |
| Balmer DF, Richards BF.(2)                                           | Qualitative themes that emerged: 1) Teaching skills and personal growth; 2) Impact on Interpersonal relationships; 3) impact on the institution                                                                                                                                                                                                                                                                                                                                                                                                                      | <ul style="list-style-type: none"> <li>• Institutional impact</li> <li>• Pedagogical Skills</li> <li>• Relationship-building</li> <li>• Perspective-taking/Reflection</li> </ul> |
| Birigwa SN, <i>et al.</i> (3)                                        | “...NM workshops help with coping with stress, give time to relax and self-reflect, and increase positive physician/patient engagement.”                                                                                                                                                                                                                                                                                                                                                                                                                             | <ul style="list-style-type: none"> <li>• Relationship-building</li> <li>• Resilience and burnout detection/mitigation</li> <li>• Perspective-taking/Reflection</li> </ul>        |
| Bobb SJ(4)                                                           | “...Building stronger relationships as they grew more aware of each other’s stories and had the opportunity to reflect on their work among their coworkers.... intensified individual and team understanding of their roles as healthcare professionals...this process positively contributed to their individual and shared identity, value, and meaning as a nurse.”                                                                                                                                                                                               | <ul style="list-style-type: none"> <li>• Perspective-taking/Reflection</li> <li>• Relationship-building</li> <li>• Confidence/Personal accomplishment</li> </ul>                 |
| Boudreau JD, <i>et al.</i> (5)<br>AND Liben S, <i>et al.</i> (6)     | “The written comments were invariably supportive... The most prevalent specific recommendations revolved around ensuring that in future workshops everyone should be accorded the opportunity to share stories... A second cluster of recommendations had to do with the quality of the writing triggers”<br>“...the majority of study participants already use a form of narrative in their teaching ... those who attended displayed a more nuanced understanding of narrative as revealed by their (appropriate) use of specific narrative medicine descriptors.” | <ul style="list-style-type: none"> <li>• Narrative competence</li> <li>• Satisfaction</li> </ul>                                                                                 |
| Brigley S, Jasper M(7)                                               | “...improved educational understanding and multidisciplinary awareness among its participants. Refinements of the programme were identified...”                                                                                                                                                                                                                                                                                                                                                                                                                      | <ul style="list-style-type: none"> <li>• Relationship-building</li> <li>• Perspective-taking/Reflection</li> </ul>                                                               |
| Chretien KC, <i>et al.</i> (8)<br>AND Chretien KC, <i>et al.</i> (9) | Qualitative analysis resulted in four themes: patient experience, student experience (and student learning), student-patient dynamic, and challenges.<br>‘Students' stories showed attainment of narrative competence.’                                                                                                                                                                                                                                                                                                                                              | <ul style="list-style-type: none"> <li>• Narrative competence,</li> <li>• Relationship-building,</li> <li>• Satisfaction</li> </ul>                                              |
| DasGupta S, <i>et al.</i> (10)<br>AND DasGupta S.(11)                | “...all participants believed the activity helped them learn about the importance of recognizing cultural differences.” “...the medical residents reported a variety of intentions to change their attitudes and behaviors including an intention to be more sensitive to cultural differences and more patient and to recognize their biases and the effect of those biases on caregiving.”                                                                                                                                                                         | <ul style="list-style-type: none"> <li>• Cultural competence</li> <li>• Relationship-building</li> <li>• Empathy</li> </ul>                                                      |
| Goodrich TJ, <i>et al.</i> (12)                                      | Findings from the Focus Groups: 1) relevance of narratives in ethical decision making, 2) empathic connection that was achieved through narrative understanding as necessary for producing ethical behavior, 3) ways to nurture insights regarding contextualizing their patients. Findings from the program evaluations: 1) More holistic way of looking at patients (beyond just the illness), 2) recognition of how physicians' values enter into clinical decision making                                                                                        | <ul style="list-style-type: none"> <li>• Empathy</li> <li>• Ethical inquiry</li> <li>• Narrative competence</li> <li>• Relationship-building</li> </ul>                          |

| Reference                     | Outcomes/Findings                                                                                                                                                                                                                                                                                                                                                                                                                                             | Outcome Improved – Thematic Grouping                                                |
|-------------------------------|---------------------------------------------------------------------------------------------------------------------------------------------------------------------------------------------------------------------------------------------------------------------------------------------------------------------------------------------------------------------------------------------------------------------------------------------------------------|-------------------------------------------------------------------------------------|
| Gordon E.(13)                 | "Of [the 39 essays analyzed], 13 (33%) contained statements concerning for burnout." The authors conclude that, "Narrative medicine can be a powerful tool for identifying signs of burnout among Internal Medicine residents. In addition, sharing of patient stories in groups can help trainees to reflect the commonality of challenging patient experiences, which might mitigate feelings of burnout."                                                  | • Resilience and burnout detection/mitigation                                       |
| Goupy F, <i>et al.</i> (14)   | Satisfaction with program                                                                                                                                                                                                                                                                                                                                                                                                                                     | • Satisfaction                                                                      |
| Gowda D, <i>et al.</i> (15)   | "... team members across the disciplines and levels of educational attainment are open to active participation in sessions... team members speak of strengthening attention, valuing creativity, and enhancing relationships."                                                                                                                                                                                                                                | • Relationship-building<br>• Resilience and burnout detection/mitigation<br>Empathy |
| Holub PG.(16)                 | Confirmed quantitative findings that participants' rates of empathy was greater than non-participants.                                                                                                                                                                                                                                                                                                                                                        | Empathy                                                                             |
| Kennedy AJ, Sgro G. (17)      | Satisfaction with program; suggestions for improvement                                                                                                                                                                                                                                                                                                                                                                                                        | Satisfaction                                                                        |
| Murinson, B.(18)              | "Qualitative analysis revealed that: emotional suffering, (e.g., isolation, heartache, etc.) is nearly universal for students at this stage, while physical pain is not; distinguishing physical pain from psychological or social suffering was initially difficult for some students, but the majority improved in this capacity; and that students were challenged to define their own values which served to enhance awareness of other's value systems." | • Empathy<br>• Ethical inquiry<br>Perspective-taking/Reflection                     |
| Polvani S, <i>et al.</i> (19) | Doctor-patient Relationships                                                                                                                                                                                                                                                                                                                                                                                                                                  | • Relationship-building                                                             |
| Small, <i>et al.</i> (20)     | "... narrative medicine can play a role in building community among diverse health care providers and promoting self-care."                                                                                                                                                                                                                                                                                                                                   | • Relationship-building<br>• Empathy<br>Resilience and burnout detection/mitigation |
| Spike J.(21)                  | Satisfaction with program components                                                                                                                                                                                                                                                                                                                                                                                                                          | • Satisfaction                                                                      |
| Walker MR, <i>et al.</i> (22) | Satisfaction and organization of program; the climate, content and leadership of the teachers was the most valued aspects of the program. The number of sessions and activities was reported as insufficient. Participants offered suggestions for improving the program.                                                                                                                                                                                     | • Satisfaction                                                                      |
| Winkel AF, <i>et al.</i> (23) | Satisfaction with program. Residents found it enjoyable, felt more calm/clear headed and satisfied with their daily work. One resident said the writing was difficult. Described reasons for non-attendance.                                                                                                                                                                                                                                                  | • Satisfaction                                                                      |
| Wohlmann A, Halstein M.(24)   | Satisfaction; program helped to understand the patients as humans and that interpretation is important to interaction                                                                                                                                                                                                                                                                                                                                         | • Satisfaction                                                                      |
| Zohouri M.(25)                | "... Three major categories in students' reflection on reading Death of Ivan Ilych as an end of life human body... 1) Emotional experience, 2) Empathy and effective communication, 3) Spirituality and dignity...this reflection activity may help medical students have a deeper idea of the end of life situation and feelings."                                                                                                                           | • Empathy<br>• Relationship-building<br>Perspective-taking/Reflection               |

## Supplemental Digital Appendix 3. Records included in Narrative Medicine Systematic Review

| Authors                      | Publication Year | Publication Type | Program Location      | Number of Participants | Participant Constituency             | Program Goals                                                                                                                                                                                 | Number of Sessions | Hours in Program | Program Activities                                                                                                                                                                                                                                                | Program Evaluation                 |
|------------------------------|------------------|------------------|-----------------------|------------------------|--------------------------------------|-----------------------------------------------------------------------------------------------------------------------------------------------------------------------------------------------|--------------------|------------------|-------------------------------------------------------------------------------------------------------------------------------------------------------------------------------------------------------------------------------------------------------------------|------------------------------------|
| Arntfield, <i>et al.</i> (1) | 2013             | Article          | New York, NY, USA     | 12                     | Medical students                     | To explore the influence of NM training on fourth-year medical students' clinical skills, including communication, collaboration, and professionalism.                                        | 4                  | 10               | Faculty facilitators used readings as a basis for discussion about illness and patient care, and to introduce reflective writing exercises. Participants responded to writing prompts and shared their narratives with the group.                                 | Qualitative – Well Described       |
| Aronson L, Schwabbe W.(26)   | 2015             | Abstract         | Philadelphia, PA, USA | N/S                    | N/S                                  | To foster writing for wellness, advocacy, or education and to facilitate the publication of writing by healthcare professionals                                                               | 1                  | N/S              | A discussion of different modes of writing by healthcare professionals and the varied purposes of such writing. Publication strategies and venues were discussed. Participants wrote in class and received peer feedback from colleagues in a small group format. | None/Not Specified                 |
| Ball SC(27)                  | 2011             | Abstract         | New York, NY, USA     | N/S                    | Medical students                     | To support medicine sub interns through training in reflective writing and narrative competence                                                                                               | N/S                | N/S              | Reflected on sub internship experience, read and discussed texts, offered their perspectives on writing content and style, responded to a writing prompt, and shared their narratives.                                                                            | None/Not Specified                 |
| Balmer, <i>et al.</i> (28)   | 2016             | Abstract         | Houston, TX, USA      | 8                      | Medical students, residents, faculty | To assess the feasibility of integrating NM training into clinical rotations                                                                                                                  | 12                 | 60               | Engaged in literary analysis, small group discussions, and writing workshops. They also submitted a piece of writing for workshopping.                                                                                                                            | Qualitative—Incomplete Description |
| Balmer DF, Richards BF(2)    | 2012             | Article          | New York, NY, USA     | 25                     | Faculty                              | To implement a faculty development program that employed foundational tenants of NM (reading and reflection) as a means towards fostering behavioral and social sciences in medical education | N/S                | N/S              | Read and discussed published narratives to enhance their teaching competencies. They also generated reflective writing for the purpose of telling stories about themselves, their students, and their patients.                                                   | Qualitative – Well Described       |



| Authors                                                  | Publication Year | Publication Type | Program Location   | Number of Participants | Participant Constituency                | Program Goals                                                                                                                                   | Number of Sessions | Hours in Program | Program Activities                                                                                                                                                                                                                             | Program Evaluation                                                  |
|----------------------------------------------------------|------------------|------------------|--------------------|------------------------|-----------------------------------------|-------------------------------------------------------------------------------------------------------------------------------------------------|--------------------|------------------|------------------------------------------------------------------------------------------------------------------------------------------------------------------------------------------------------------------------------------------------|---------------------------------------------------------------------|
| Bhavaraju VL, Miller S(29)                               | 2014             | Article          | Phoenix, AZ, USA   | 12                     | Faculty                                 | To guide residents in using reflective writing to process emotions, reactions, and motivations related to their professional lives              | 12                 | 24               | Opening writing prompt, discussion of doctor-patient related themes in literary pre-readings, and sharing of personal narratives.                                                                                                              | Quantitative – Well Described                                       |
| Birigwa, <i>et al.</i> (3)                               | 2017             | Abstract         | New York, NY, USA  | 16                     | Residents                               | To employ NM for the promotion of wellbeing, self-care, mindfulness, and empathy in pediatric residents                                         | 4                  | 4                | Discussion of literature, reflective writing, art, and spirituality. Motifs explored included: self-care, narrative humility, illness, death, and giving bad news.                                                                             | Qualitative – Well Described                                        |
| Bobb SJ(4)                                               | 2017             | Thesis           | Milwaukee, WI, USA | 11                     | Nurses                                  | To assess the impact of NM practices on the teamwork and professional identity of NICU nurses                                                   | 3                  | N/S              | Read and discussed a narrative, followed by free-writing time based on a prompt, and sharing. Group narrative sessions were followed by semi-structured, one-on-one interviews. Finally, participants were observed while working in the NICU. | Qualitative – Well Described                                        |
| Boudreau, <i>et al.</i> (5) AND Liben, <i>et al.</i> (6) | 2012             | 2 Articles       | Montreal, Canada   | ~ 92                   | Faculty                                 | To introduce narrative theory, practice reflective writing, and discuss strategies for integrating reflective exercises into an apprenticeship. | 1                  | 3                | Workshops included a didactic component as well as literary and writing exercises to develop skills in narrative and reflection.                                                                                                               | Quantitative – Incomplete Description, Qualitative – Well Described |
| Brigley S, Jasper M(7)                                   | 2010             | Article          | Cardiff, Wales, UK | 22                     | Faculty, trainees, administrators/staff | To develop a highly functioning, multidisciplinary faculty of practitioners in surgery operating theaters                                       | 6                  | 36               | Involved reading, reflective writing and portfolio-building for professional development in surgery faculty, trainees, and staff.                                                                                                              | Qualitative – Well Described                                        |

| Authors                                     | Publication Year | Publication Type     | Program Location     | Number of Participants | Participant Constituency                             | Program Goals                                                                                                                                                                                                                                                              | Number of Sessions | Hours in Program | Program Activities                                                                                                                                                                                                                                                                                                                        | Program Evaluation                                                             |
|---------------------------------------------|------------------|----------------------|----------------------|------------------------|------------------------------------------------------|----------------------------------------------------------------------------------------------------------------------------------------------------------------------------------------------------------------------------------------------------------------------------|--------------------|------------------|-------------------------------------------------------------------------------------------------------------------------------------------------------------------------------------------------------------------------------------------------------------------------------------------------------------------------------------------|--------------------------------------------------------------------------------|
| Chretien KC, <i>et al.</i> (8, 9)           | 2014, 2015       | Abstract & Article   | Washington D.C., USA | 47                     | Medical students                                     | To develop narrative competence, foster attentive listening, and promote reflection with the broader goal of empathy-formation for better patient care and improved outcomes                                                                                               | 3                  | N/S              | Introduced NM concepts, including a paired storytelling and listening exercise; students attentively listen to and record patient narratives of illness, and to read these back to the patients. Students also worked with patients to choose artwork to effectively represented their story; wrote reflectively about their experiences. | Qualitative – Well Described                                                   |
| DasGupta(11) & DasGupta, <i>et al.</i> (10) | 2006             | 2 Articles           | New York, NY, USA    | ~20                    | Resident, faculty, para-medical workers, other staff | To foster cultural competence and effective, empathic communication through a literary case study, with the aim of improving patient care                                                                                                                                  | 13                 | N/S              | Sessions opened with questions about the text and conversation to discuss themes relevant to the novel, including intercultural communication, healthcare practices, and relating to chronically ill and/or dying patients.                                                                                                               | Qualitative – Well Described                                                   |
| Elliott <i>et al.</i> (30) & Schaff P(31)   | 2006 & 2010      | Article & Curriculum | Los Angeles, CA, USA | N/S                    | Medical students                                     | To explore clinical skills that foster empathy and recognize the significance of narrative in relation to patients' stories, reflective writing, and appreciating vulnerability. To apply narrative competence and reflective practice skills to the clerkship experience. | 1                  | 2                | Storytelling, followed by 30 minutes of discussion about the literary pre-readings, then reflective writing followed by time for sharing their narratives. Assignments included online weekly journal entries and a narrative project for the final session.                                                                              | Quantitative – Incomplete Description,<br>Qualitative – Incomplete Description |

| Authors                      | Publication Year | Publication Type | Program Location                     | Number of Participants | Participant Constituency          | Program Goals                                                                                                                                                                                                                                                  | Number of Sessions | Hours in Program | Program Activities                                                                                                                                                                                                                                                                                                                                                                                                                                                 | Program Evaluation                                                     |
|------------------------------|------------------|------------------|--------------------------------------|------------------------|-----------------------------------|----------------------------------------------------------------------------------------------------------------------------------------------------------------------------------------------------------------------------------------------------------------|--------------------|------------------|--------------------------------------------------------------------------------------------------------------------------------------------------------------------------------------------------------------------------------------------------------------------------------------------------------------------------------------------------------------------------------------------------------------------------------------------------------------------|------------------------------------------------------------------------|
| Goodrich, <i>et al.</i> (12) | 2005             | Article          | New York, NY, USA & Houston, TX, USA | 48                     | Residents                         | To foster comprehension of and appreciation for the narrative basis of medicine, the ethical dimension of medical encounters, the intersection between social context and clinical decision-making, and the employment of narrative to inform decision making. | 4                  | 16               | The sessions included: demonstration of the narrative aspect of clinical encounters, demonstrated the application of narrative analysis principles to medical narratives; presentations about patients and the medical chart as a form of written reflection, time to practice writing narratives; analyzed stories written by participants; demonstrated the significance of ethics and values as conveyed by narrative, discussed their learning in the program. | Quantitative – Well Described,<br>Qualitative – Well Described         |
| Gordon E(13)                 | 2017             | Abstract         | Newark, NJ, USA                      | 43                     | Residents                         | To identify and alleviate burnout and to foster resilience.                                                                                                                                                                                                    | 1                  | N/S              | Reading a NM piece, submitting writings about meaningful patient encounters.                                                                                                                                                                                                                                                                                                                                                                                       | Qualitative – Well Described                                           |
| Goupy, <i>et al.</i> (14)    | 2013             | Article          | Paris, France                        | 41                     | Medical students                  | To teach narrative and emphasize the significance of listening and writing to better observe/interpret patients' stories and improve the doctor-patient relationship.                                                                                          | 6                  | 20               | Included sessions on: definition of NM and ice breakers for group formation, viewing a film and related discussion, a narrative writing exercise focused on participants' stories of personal or family illness, the theme of empathy in the doctor-patient relationship, the connection between art and medicine, and an overarching discussion about uses of NM.                                                                                                 | Quantitative – Well Described,<br>Qualitative – Well Described         |
| Gowda, <i>et al.</i> (15)    | 2017             | Abstract         | New York, NY, USA                    | ~65                    | Residents, faculty, nurses, staff | To utilize NM in clinical settings for enhancing interprofessional education and practice while reducing burnout                                                                                                                                               | 40                 | 20               | Discussion of published narratives, reflective writing exercises, and peer sharing of written pieces.                                                                                                                                                                                                                                                                                                                                                              | Quantitative – Incomplete Description,<br>Qualitative – Well Described |

| Authors                  | Publication Year | Publication Type | Program Location         | Number of Participants | Participant Constituency                                      | Program Goals                                                                                                                                                                            | Number of Sessions | Hours in Program | Program Activities                                                                                                                                                                                                                                                                                         | Program Evaluation                                             |
|--------------------------|------------------|------------------|--------------------------|------------------------|---------------------------------------------------------------|------------------------------------------------------------------------------------------------------------------------------------------------------------------------------------------|--------------------|------------------|------------------------------------------------------------------------------------------------------------------------------------------------------------------------------------------------------------------------------------------------------------------------------------------------------------|----------------------------------------------------------------|
| Heller EA, Heller FE(32) | 2016             | Abstract         | New York, NY, USA        | N/S                    | Care-givers, staff, patients                                  | To support patients and improve communication and understanding among patients, staff, and caregivers                                                                                    | N/S                | N/S              | Literature and writing are employed to foster discussion. Patients write their stories as a means of gaining a sense of autonomy over their medical trajectories. The workshop creates a trust-based community, fostering communication among caregivers, staff, and patients coping with chronic illness. | None/Not Specified                                             |
| Hellerstein DJ(33)       | 2015             | Article          | New York, NY, USA        | ~192                   | Medical students                                              | To train more effective doctors by helping preclinical medical students to engage with humanities education                                                                              | 6                  | 18               | Close readings and discussion of literary narratives and in-class writing assignments. Participant writings are peer-edited and re-written before submission.                                                                                                                                              | None/Not Specified                                             |
| Holub PG(16)             | 2011             | Thesis           | Fort Lauderdale, FL, USA | 44                     | Students (doctoral-level health sciences)                     | To assess affective development of medical professionalism through online NM programming                                                                                                 | 12                 | 12               | Compared 2 programs on medical ethics and professionalism. Control involved used traditional, problem-based learning activities. Treatment involved relevant literary and multimedia narratives to supplement the text-based case studies.                                                                 | Quantitative – Well Described,<br>Qualitative – Well Described |
| Hurst M, Irvine C(34)    | 2014             | Book chapter     | New York, NY, USA        | 15-18                  | Students in NM master's program (including medical providers) | To positively alter attitudes about death, dying, and end-of-life-care by facilitating interdisciplinary discourse (e.g. among healthcare professionals, writers, philosophers, artists) | N/S                | N/S              | Discussions based on literature and film. Participants practice preparing and teaching NM lessons like what they might use in future medical education. The final assignment is a genre or media analysis focused on storytelling to understand death and dying.                                           | None/Not Specified                                             |

| Authors                       | Publication Year | Publication Type | Program Location    | Number of Participants | Participant Constituency             | Program Goals                                                                                                                                                          | Number of Sessions | Hours in Program | Program Activities                                                                                                                                                                                                                                                                                                                               | Program Evaluation                    |
|-------------------------------|------------------|------------------|---------------------|------------------------|--------------------------------------|------------------------------------------------------------------------------------------------------------------------------------------------------------------------|--------------------|------------------|--------------------------------------------------------------------------------------------------------------------------------------------------------------------------------------------------------------------------------------------------------------------------------------------------------------------------------------------------|---------------------------------------|
| Jacobs ZG(35)                 | 2017             | Abstract         | Pittsburgh, PA, USA | N/S                    | Medical students, residents, faculty | To develop a sustainable, collaborative NM workshop for fostering narrative competence and empathy, as well as for promoting well being among healthcare professionals | 8                  | 8                | Explored medically-related themes by cultivating narrative competence, with a focus on literary close reading/textual analysis; reflective writing/storytelling; and interpreting art, film, and photography. Participants had the opportunity to engage in an online forum, where literary excerpts and reflective writing prompts were posted. | Quantitative – Incomplete Description |
| Kennedy AJ, Sgro G(17)        | 2016             | Abstract         | Pittsburgh, PA, USA | 7                      | Medical students, residents, faculty | To use creative nonfiction to help residents consider other perspectives, thus providing enhanced care for patients from underserved populations                       | 4                  | N/S              | Completed pre-readings and interviewing one of their patients at a clinic for underserved populations; they later wrote about patients. Workshops focused on narrative themes. Sessions included discussions of the pre-readings and writing to prompts, and the opportunity for participants to read their stories and receive peer feedback.   | Qualitative – Satisfaction Only       |
| Kissler, et al.(36)           | 2016             | Article          | Houston, TX, USA    | 17                     | Medical students                     | To explore how medical students' narrative reflections about their experiences in the anatomy lab might display themes relevant to professional identity formation     | 1                  | 1                | Read two narratives and then wrote to related prompts. Writing time was followed by a group exercise in which students had the opportunity to read their narratives and engage in discussion with peers.                                                                                                                                         | None/Not Specified                    |
| Lane-Reticke r A, Fogel C(37) | 2012             | Abstract         | Hartford, CT, USA   | 5                      | Physicians                           | To discuss the significance of the humanities in career development in Hospice and Palliative Medicine and overall physician wellness                                  | N/S                | N/S              | Read poetry and (sometimes) perspectives pieces from medical journals, and engaged in reflective writing. By turns, participants facilitate the discussion. Also went to a local art museum and watched a film with an end-of-life theme.                                                                                                        | None/Not Specified                    |

| Authors                        | Publication Year | Publication Type | Program Location   | Number of Participants | Participant Constituency                                      | Program Goals                                                                                                                                                                                                          | Number of Sessions | Hours in Program | Program Activities                                                                                                                                                                                                                                             | Program Evaluation                                                  |
|--------------------------------|------------------|------------------|--------------------|------------------------|---------------------------------------------------------------|------------------------------------------------------------------------------------------------------------------------------------------------------------------------------------------------------------------------|--------------------|------------------|----------------------------------------------------------------------------------------------------------------------------------------------------------------------------------------------------------------------------------------------------------------|---------------------------------------------------------------------|
| Machado MC, Lobo Antunes J(38) | 2016             | Article          | Lisbon, Portugal   | 12                     | Medical students                                              | To develop narrative competence, learn communication strategies, interpret and understand illness narratives, and cultivate reflective practice                                                                        | N/S                | 23+              | Reading literary texts, reflective dialogue, and reflective writing were employed during the theoretical component to facilitate discussion of various themes.                                                                                                 | None/Not Specified                                                  |
| Mark, <i>et al.</i> (39)       | 2017             | Abstract         | Phoenix, AZ, USA   | N/S                    | Nurses                                                        | To define and explain the theory and practice of NM, and to demonstrate how NM skills can help increase empathy and understanding for better patient care                                                              | 1                  | 1                | The program introduced NM theory, methods, applications, and tools to promote trainee self-care, with a particular focus on secondary trauma.                                                                                                                  | None/Not Specified                                                  |
| Moss, <i>et al.</i> (40)       | 2014             | Abstract         | New York, NY, USA  | 27                     | Resident fellows                                              | Created and implemented an NM program to reduce burnout and increase empathy and perceptions of service culture                                                                                                        | 4                  | N/S              | NM workshops were introduced into protected, didactic time slots. Sessions employed literature (poetry and short stories) and made time for reflective writing and group discussion to explore themes and issues.                                              | Quantitative – Well Described                                       |
| Murinson B(18)                 | 2010             | Curriculum       | Baltimore, MD, USA | N/S                    | Medical students                                              | To approach pain and suffering through the lens of the humanities as a means of encouraging emotional growth, developing empathy, and fostering professional value formation regarding the ethics of dealing with pain | 4                  | 8                | Encouraged participants to reflect and discuss experiences of and responses to pain to foster emotional growth and develop empathy.                                                                                                                            | Quantitative – Incomplete Description, Qualitative – Well Described |
| Polvani, <i>et al.</i> (19)    | 2014             | Article          | Florence, Italy    | 70                     | Physicians, nurses, paramedical workers, administrators/staff | To enhance NM awareness among health professionals as a means of improving quality of care                                                                                                                             | N/S                | N/S              | Interviewed patients about their illness to identify critical issues. Used focus groups, theater, poems, and video recorded conversations to assess both verbal and nonverbal communication to improve doctor-patient relationships and explore communication. | Qualitative – Well Described                                        |

| Authors                      | Publication Year | Publication Type | Program Location                 | Number of Participants | Participant Constituency                                                                                         | Program Goals                                                                                                        | Number of Sessions | Hours in Program | Program Activities                                                                                                                                                                                  | Program Evaluation                                                        |
|------------------------------|------------------|------------------|----------------------------------|------------------------|------------------------------------------------------------------------------------------------------------------|----------------------------------------------------------------------------------------------------------------------|--------------------|------------------|-----------------------------------------------------------------------------------------------------------------------------------------------------------------------------------------------------|---------------------------------------------------------------------------|
| Robeson R, King NMP(41)      | 2017             | Article          | Chapel Hill/Wake Forest, NC, USA | N/S                    | Medical students, graduate bioethics students (including health professionals)                                   | To cultivate reflection and discussion related to bioethics.                                                         | N/S                | N/S              | Course sessions can be subdivided into three phases: discussion and analysis, research, and writing of the performable case studies (PCS).                                                          | None/Not Specified                                                        |
| Roy R(42)                    | 2007             | Article          | Chicago, IL, USA                 | N/S                    | Medical students                                                                                                 | To use literature and reflective writing as a means of teaching cultural competence, communication, and sensitivity  | 4                  | N/S              | As pre-work, participants reviewed reflective readings based on session themes and wrote short reflective narratives. In-class time included literary analysis, discussion, and reflective writing. | Qualitative—Incomplete Description                                        |
| Shankar PR(43)               | 2009             | Article          | Pokhara, Nepal                   | 26                     | Medical students, faculty                                                                                        | To promote the advantages of the medical humanities for medical students and physicians                              | 13                 | N/S              | Small-group sessions included literary and art analysis, reflective writing, group discussion, role play, case studies, and debates for exploring medical humanities.                               | Qualitative—Incomplete Description                                        |
| Small LC, <i>et al.</i> (20) | 2017             | Article          | Baltimore, MD, USA               | 126                    | Medical students, resident, fellows, faculty, nurses, nursing students, paramedical worker, administrators/staff | To foster empathy, reflective practice, and interdisciplinary community-building among clinicians and hospital staff | 18                 | N/S              | Each session included discussion of literary readings, reflective writing based on a prompt, and sharing of participant writings.                                                                   | Qualitative – Well Described                                              |
| Spike J(21)                  | 2008             | Curriculum       | Houston TX, USA                  | N/S                    | Medical students                                                                                                 | To employ narrative to discuss professionalism, problem solving, and work-life balance                               | 1                  | 3                | Pre-readings were assigned well in advance and facilitators led small-group sessions (<10 students). The session also allowed time for a short reflective writing exercise.                         | Quantitative – Incomplete Description,<br>Qualitative – Satisfaction Only |

| Authors                                  | Publication Year | Publication Type     | Program Location                                              | Number of Participants | Participant Constituency | Program Goals                                                                                                                                                | Number of Sessions | Hours in Program | Program Activities                                                                                                                                                                                                                                                                                                                             | Program Evaluation                                                        |
|------------------------------------------|------------------|----------------------|---------------------------------------------------------------|------------------------|--------------------------|--------------------------------------------------------------------------------------------------------------------------------------------------------------|--------------------|------------------|------------------------------------------------------------------------------------------------------------------------------------------------------------------------------------------------------------------------------------------------------------------------------------------------------------------------------------------------|---------------------------------------------------------------------------|
| Walker, <i>et al.</i> (22)               | 2012             | Article              | Santiago, Chile                                               | 36                     | Faculty                  | To experiment with literary texts and writing techniques in medical education as a means of awakening creativity and facilitating reflection                 | 6                  | 12               | Sessions included reading and reflecting on literary texts, writing, sharing, and discussing participants' narratives. At the end of the course, each participant presented a narrative to be evaluated by peers and teachers according to: theme, character(s), context, development (conflict and/or transformation), and writing technique. | Quantitative – Well Described,<br>Qualitative – Satisfaction Only         |
| Winkel (44) & Winkel, <i>et al.</i> (45) | 2016             | Article & Curriculum | New York City, NY, USA; Chicago, IL, USA; Burlington, VT, USA | 66 [43 evaluated]      | Residents                | To determine if an NM curriculum can reduce burnout. To train residents in reflecting on and processing their own and their patients' experiences            | 15                 | 15               | Used literary narratives to foster discussion focused on relevant themes. Reflective writing prompts and time for sharing participant narratives were also integrated into the curriculum.                                                                                                                                                     | Quantitative – Well Described                                             |
| Winkel AF, <i>et al.</i> (23)            | 2010             | Article              | New York City, NY, USA                                        | 20                     | Residents                | To reduce burnout and enhance empathy through NM and reflection                                                                                              | 6                  | 6                | Sessions opened with reading and discussing fiction. Writing prompts were used to generate narratives in class. Participants were encouraged to read their writings to the group and invite feedback in an atmosphere of confidentiality.                                                                                                      | Quantitative – Incomplete Description,<br>Qualitative – Satisfaction Only |
| Wohlmann A, Halstein M(24)               | 2016             | Article              | Mainz, Germany                                                | 9                      | Medical students         | To use texts and art for fostering observational skills, developing an understanding of complex illness narratives, and appreciating diverse interpretations | 6                  | 7.5              | Participants engaged in close reading short stories, poems, and novels with medical motifs. Discussion included analysis of effective literary techniques and meaning. Participants engaged reflective writing and subsequent peer workshopping.                                                                                               | Quantitative – Incomplete Description,<br>Qualitative – Satisfaction Only |



| Authors                     | Publication Year | Publication Type | Program Location | Number of Participants | Participant Constituency | Program Goals                                                          | Number of Sessions | Hours in Program | Program Activities                                                                                   | Program Evaluation           |
|-----------------------------|------------------|------------------|------------------|------------------------|--------------------------|------------------------------------------------------------------------|--------------------|------------------|------------------------------------------------------------------------------------------------------|------------------------------|
| Zohouri, <i>et al</i> (25). | 2017             | Article          | Shiraz, Iran     | 350                    | Medical students         | To use a literary narrative to foster reflection on end-of-life issues | 1                  | 2                | Used the Kolb four-stage experiential model to write reflectively about their thoughts on a novella. | Qualitative – Well Described |

<sup>a</sup> Abbreviations: N/S – Not specified; N/A – Not applicable

<sup>b</sup> Results of evaluations were not mentioned in the abstract; thus, these results have not been included with the descriptions of positive NM program outcomes discussed in the text of our review.

<sup>c</sup> Results were not statistically significant; thus, these results have not been included with the description of positive NM program outcomes discussed in the text of our review.

**Supplemental Digital Appendix 4.** Locations of Programs Included in Narrative Medicine Systematic Review

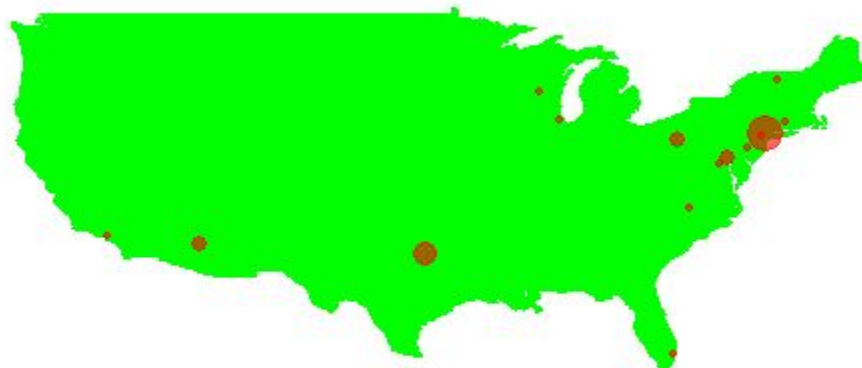

United States of America

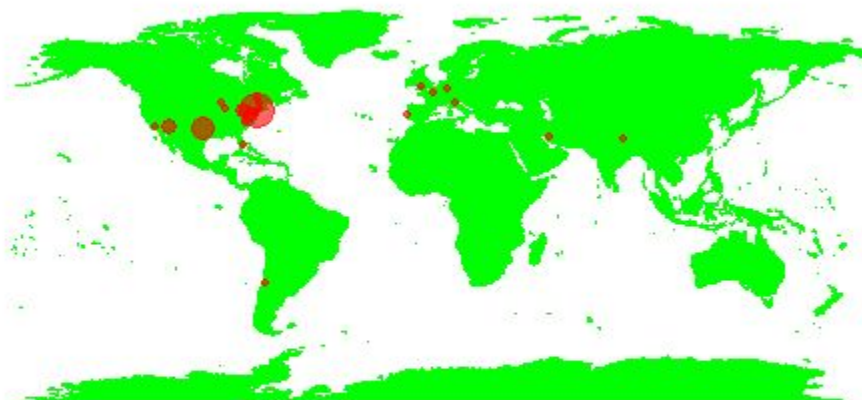

World

## Supplemental Digital Appendix 5. Quantitative and Qualitative Incomplete Evaluation Descriptions of Narrative Medicine Programs in Systematic Review<sup>1</sup>

| <b>Quantitative – Incomplete Description</b>                                                                                                                                                                                             |                                                      |                                                                                                                                                                     |                                                                                                                                                                                        |
|------------------------------------------------------------------------------------------------------------------------------------------------------------------------------------------------------------------------------------------|------------------------------------------------------|---------------------------------------------------------------------------------------------------------------------------------------------------------------------|----------------------------------------------------------------------------------------------------------------------------------------------------------------------------------------|
| <b>Reference</b>                                                                                                                                                                                                                         | <b>Outcome–<br/>new or<br/>validated<br/>measure</b> | <b>Outcome(s)</b>                                                                                                                                                   | <b>Rationale for determining incomplete<br/>evaluation</b>                                                                                                                             |
| Boudreau, <i>et al.</i> AND Liben S, <i>et al.</i> (5, 6)                                                                                                                                                                                | New                                                  | Narrative Skills Assessment Tool                                                                                                                                    | Authors report no consistent differences in responses between attendees and non-attendees. Scores not reported.                                                                        |
| Elliott D, <i>et al.</i> AND Schaff P.(30, 31)                                                                                                                                                                                           | New                                                  | 1) satisfaction with workshop, 2) usefulness of workshop in enhancing perspectives about some of the guiding principles of Family Medicine, 3) value of the session | The percent agreement was reported, but not the total N or the actual wording of the evaluation questions                                                                              |
| Gowda D, <i>et al.</i> (15)                                                                                                                                                                                                              | Validated                                            | Maslach Burnout Inventory, Utrecht Work Engagement Score, Team Development, Interpersonal Reactivity                                                                | “At baseline, scores for burnout were higher for attending physicians, while scores for other instruments were comparable. Pre-post differences will be available by conference date.” |
| Jacobs ZG, Sgro G.(35)                                                                                                                                                                                                                   | Validated                                            | Maslach Burnout Inventory, Toronto Empathy Questionnaire, Interpersonal Reactivity                                                                                  | “The outcome of the workshop is yet to be determined, but the hope is to demonstrate that our curriculum improves participant empathy and sympathy while reducing burnout.”            |
| Murinson, B.(18)                                                                                                                                                                                                                         | New                                                  | Effectiveness of pain narratives on augmenting awareness of the nuances reality of pain                                                                             | Authors report general high-level results in narrative. Quantitative results not reported.                                                                                             |
| Spike J.(21)                                                                                                                                                                                                                             | New                                                  | Satisfaction with training                                                                                                                                          | Line graphs of distributions are provided for each measure as an attachment for two rounds of the training; Ns are not provided.                                                       |
| Winkel AF, <i>et al.</i> (23)                                                                                                                                                                                                            | Validated                                            | Maslach Burnout Inventory, Interpersonal Reactivity                                                                                                                 | “The results were not examined for quantitative trends because the numbers of participants were too small for relevant statistical analysis.”                                          |
| Wohlmann A, Halstein M.(24)                                                                                                                                                                                                              | New                                                  | satisfaction and relevance of course to future work                                                                                                                 | Reported in text the N of particular response categories, but not of the entire scale; unable to document the full evaluation findings from what is presented in narrative.            |
| <b>Qualitative – Incomplete Description</b>                                                                                                                                                                                              |                                                      |                                                                                                                                                                     |                                                                                                                                                                                        |
| Balmer, <i>et al.</i> (28), Elliott D, <i>et al.</i> AND Schaff P. (30, 31), Roy R(42), Shankar PR(43)                                                                                                                                   |                                                      |                                                                                                                                                                     |                                                                                                                                                                                        |
| <b>None/Not Specified</b>                                                                                                                                                                                                                |                                                      |                                                                                                                                                                     |                                                                                                                                                                                        |
| Aronson L, Schwalbe W.(26), Ball SC(27) Heller FE(32), Hellerstein DJ(33), Hurst M, Irvine C(34), Kissler, <i>et al.</i> (36), Lane-Reticker A, Fogel C(37), Machado MC, Lobo A J(38), Mark, <i>et al.</i> (39), Robeson R, King NMP(41) |                                                      |                                                                                                                                                                     |                                                                                                                                                                                        |

<sup>1</sup> All Quantitative Evaluations – Well Described report evaluation at the end of the program except for Elliott D, *et al.* and Schaff P. 30. Elliott D, Schaff P, Woehrl T, Walsh A, Trial J. Narrative Reflection in Family Medicine Clerkship - Cultural Competence in the Third Year Required Clerkships. MedEdPORTAL. 2010;6(1153), 31. Schaff P. Donning the White Coat: The Narrative Threads of Professional Development. J Learn Through the Arts. 2006;2(1):21. and Gowda D, *et al.*(13), which do not specify timing.

## Supplemental Digital Appendix 6: Basic Checklist for Designing, Implementing, Evaluating, and Disseminating a Narrative Medicine Program in Academic Medicine/Health Sciences

### Program Design

#### *Identify participant constituency*

- |                                                            |                                                |
|------------------------------------------------------------|------------------------------------------------|
| <input type="checkbox"/> Allied Health Professionals       | <input type="checkbox"/> Nursing Students      |
| <input type="checkbox"/> Faculty (clinical, research)      | <input type="checkbox"/> Physician Non-Faculty |
| <input type="checkbox"/> Graduate Health Sciences Students | <input type="checkbox"/> Residents/Fellows     |
| <input type="checkbox"/> Medical Students                  | <input type="checkbox"/> Staff                 |
| <input type="checkbox"/> Nurses                            | <input type="checkbox"/> Other                 |

#### *Conduct a needs assessment with target constituency*

- |                                                       |                                                    |
|-------------------------------------------------------|----------------------------------------------------|
| <input type="checkbox"/> Perceived Narrative Interest | <input type="checkbox"/> Perceived Narrative Needs |
|-------------------------------------------------------|----------------------------------------------------|

#### *Identify target goals and outcomes*

- |                                                                               |                                                   |
|-------------------------------------------------------------------------------|---------------------------------------------------|
| <input type="checkbox"/> Burnout Detection/Mitigation                         | <input type="checkbox"/> Perspective-taking       |
| <input type="checkbox"/> Clinical Competence                                  | <input type="checkbox"/> Professionalism/Vocation |
| <input type="checkbox"/> Confidence/Self-efficacy                             | <input type="checkbox"/> Relationship Building    |
| <input type="checkbox"/> Empathy/Sympathy                                     | <input type="checkbox"/> Reflection               |
| <input type="checkbox"/> Medical Team Functioning                             | <input type="checkbox"/> Relevance to Work        |
| <input type="checkbox"/> Narrative Competence (including Attentive Listening) | <input type="checkbox"/> Resilience               |
| <input type="checkbox"/> Participant Satisfaction                             | <input type="checkbox"/> Wellness                 |
| <input type="checkbox"/> Pedagogy Skills                                      | <input type="checkbox"/> Writing Skills           |
|                                                                               | <input type="checkbox"/> Other                    |

#### *Identify program timeline and session format*

- |                                   |                                                                  |
|-----------------------------------|------------------------------------------------------------------|
| <input type="checkbox"/> Timeline | <input type="checkbox"/> Session Format (e.g. frequency, length) |
|-----------------------------------|------------------------------------------------------------------|

#### *Identify activities that will best support the achievement of specified goals and outcomes*

- |                                                       |                                                      |
|-------------------------------------------------------|------------------------------------------------------|
| <input type="checkbox"/> Group Discussion             | <input type="checkbox"/> Sharing of In-Class Writing |
| <input type="checkbox"/> Group Reading                | <input type="checkbox"/> Writing Workshop            |
| <input type="checkbox"/> Individual Reading           | <input type="checkbox"/> Other                       |
| <input type="checkbox"/> Reflective Writing Exercises |                                                      |

#### *Create curriculum in accordance with selected goals and activities*

- |                                                        |                                |
|--------------------------------------------------------|--------------------------------|
| <input type="checkbox"/> Principles of Adult Education | <input type="checkbox"/> Other |
|--------------------------------------------------------|--------------------------------|

#### *Formulate an evaluation methodology to best measure overall effectiveness*

- |                                       |                                        |
|---------------------------------------|----------------------------------------|
| <input type="checkbox"/> Qualitative  | <input type="checkbox"/> Mixed Methods |
| <input type="checkbox"/> Quantitative |                                        |

#### *Formulate an evaluation strategy for implementation*

- |                                             |                                     |
|---------------------------------------------|-------------------------------------|
| <input type="checkbox"/> Formative          | <input type="checkbox"/> Short-term |
| <input type="checkbox"/> Pre/Post Summative | <input type="checkbox"/> Long-term  |

#### *Consider theory of change in program design*

### Program Implementation

#### *Organize logistics*

- |                                    |                                |
|------------------------------------|--------------------------------|
| <input type="checkbox"/> Venue     | <input type="checkbox"/> Food  |
| <input type="checkbox"/> Materials | <input type="checkbox"/> Other |

#### *Recruit participants*

- |                                                                    |                                        |
|--------------------------------------------------------------------|----------------------------------------|
| <input type="checkbox"/> Direct Email                              | <input type="checkbox"/> Word of Mouth |
| <input type="checkbox"/> Institution-wide/Departmental Newsletters | <input type="checkbox"/> Other         |

#### *Distribute pre-work to participants in advance of each session*

- |                                                |                                                                            |
|------------------------------------------------|----------------------------------------------------------------------------|
| <input type="checkbox"/> Literary Pre-readings | <input type="checkbox"/> Participant-generated Narratives for Workshopping |
|------------------------------------------------|----------------------------------------------------------------------------|

---

**Program Evaluation**


---

*Assess according to pre-determined evaluation strategy*

- |                                                                         |                                                       |
|-------------------------------------------------------------------------|-------------------------------------------------------|
| <input type="checkbox"/> Pre-/post- program summative evaluations       | <input type="checkbox"/> Short-/long-term evaluations |
| <input type="checkbox"/> Formative evaluation at conclusion of sessions | <input type="checkbox"/> Other                        |

*Map target goals to outcomes to assess effectiveness*

- |                                                       |                                                   |
|-------------------------------------------------------|---------------------------------------------------|
| <input type="checkbox"/> Attentive Listening          | <input type="checkbox"/> Perspective-taking       |
| <input type="checkbox"/> Burnout Detection/Mitigation | <input type="checkbox"/> Professionalism/Vocation |
| <input type="checkbox"/> Clinical Competence          | <input type="checkbox"/> Relationship Building    |
| <input type="checkbox"/> Confidence/Self-efficacy     | <input type="checkbox"/> Reflection               |
| <input type="checkbox"/> Empathy/Sympathy             | <input type="checkbox"/> Relevance to Work        |
| <input type="checkbox"/> Medical Team Functioning     | <input type="checkbox"/> Resilience               |
| <input type="checkbox"/> Narrative Competence         | <input type="checkbox"/> Wellness                 |
| <input type="checkbox"/> Participant Satisfaction     | <input type="checkbox"/> Writing Skills           |
| <input type="checkbox"/> Pedagogy Skills              | <input type="checkbox"/> Other                    |
- 

**Program Dissemination**


---

*Identify suitable format*

- |                                                  |                                          |
|--------------------------------------------------|------------------------------------------|
| <input type="checkbox"/> Book Chapter            | <input type="checkbox"/> Curriculum      |
| <input type="checkbox"/> Conference Presentation | <input type="checkbox"/> Journal Article |

*Identify suitable target venue*

- |                                     |                                  |
|-------------------------------------|----------------------------------|
| <input type="checkbox"/> Conference | <input type="checkbox"/> Website |
| <input type="checkbox"/> Journal    | <input type="checkbox"/> Other   |

*Include relevant program details for successful replication at other institutions*

- |                                            |                                                 |
|--------------------------------------------|-------------------------------------------------|
| <input type="checkbox"/> Conceptualization | <input type="checkbox"/> Activities             |
| <input type="checkbox"/> Scope             | <input type="checkbox"/> Curriculum             |
| <input type="checkbox"/> Design            | <input type="checkbox"/> Evaluation Methodology |
| <input type="checkbox"/> Goals             | <input type="checkbox"/> Evaluation Results     |

*Submit to target venue*

## References

1. Arntfield SL, Slesar K, Dickson J, Charon R. Narrative medicine as a means of training medical students toward residency competencies. *Patient Educ Couns*. 2013;91(3):280-6.
2. Balmer DF, Richards BF. Faculty development as transformation: lessons learned from a process-oriented program. *Teach Learn Med*. 2012;24(3):242-7.
3. Birigwa SN, Khedagi AM, Katz CJ. Stop, look, listen, then breathe: The impact of a narrative medicine curriculum on pediatric residents. *Acad Pediatr*. 2017;17(5):e40-e1.
4. Bobb SJ. Finding meaning and sense-making in hospital nursing teams: The promise of Narrative Medicine. US: Marquette University 2017.
5. Boudreau JD, Liben S, Fuks A. A faculty development workshop in narrative-based reflective writing. *Perspect Med Educ*. 2012;1(3):143-54.
6. Liben S, Chin K, Boudreau JD, Boillat M, Steinert Y. Assessing a faculty development workshop in narrative medicine. *Med Teach*. 2012;34(12):e813-9.
7. Brigley S, Jasper M. Evaluation of a multidisciplinary faculty to support learning in surgical practice. *J Interprof Care*. 2010;24(4):401-11.
8. Chretien KC, Swenson R, Yoon B, Julian R, Keenan J, Kheirbek R. Storytelling with inpatients. *J Gen Intern Med*. 2014;29(1 (Supplement)):S534-S5.
9. Chretien KC, Swenson R, Yoon B, Julian R, Keenan J, Croffoot J, et al. Tell Me Your Story: A Pilot Narrative Medicine Curriculum During the Medicine Clerkship. *J Gen Intern Med*. 2015;30(7):1025-8.
10. DasGupta S, Meyer D, Calero-Breckheimer A, Costley AW, Guillen S. Teaching cultural competency through narrative medicine: intersections of classroom and community. *Teach Learn Med*. 2006;18(1):14-7.
11. DasGupta S. How to Catch the Story but Not Fall Down: Reading Our Way to More Culturally Appropriate Care. *Virtual Mentor*. 2006;8(5):315-8.
12. Goodrich TJ, Irvine CA, Boccher-Lattimore D. Narrative Ethics as Collaboration: A Four-Session Curriculum. *Fam Syst Health*. 2005;23(3):348-57.
13. Gordon E. Echoes of burnout in internal medicine resident narrative essays. *J Gen Intern Med*. 2017;32(2):S171-S2.
14. Goupy F, Abgrall-Barbry G, Aslangul E, Chahwakilian A, Delaitre D, Girard T, et al. Can narrative medicine be an answer to patient physician relationship teaching according to students' demand in medical education curricula? *Presse Med*. 2013;42(1):e1-e8.
15. Gowda D, Balmer D, Khedagi A, Curran T, Mangold M, Jiwani F, et al. Year-long narrative medicine intervention to improve interprofessional practice in three primary care practices. *J Gen Intern Med*. 2017;32(2):S725.
16. Holub PG. The influence of narrative in fostering affective development of medical professionalism in an online class. US: Nova Southeastern University; 2011.
17. Kennedy AJ, Sgro G. Birmingham voices: Developing narrative competency to better serve vulnerable populations. *J Gen Intern Med*. 2016;31(2):S806.
18. Murinson B. Pain and the humanities: exploring the meaning of pain in medicine through drama, literature, fine arts and philosophy. *MedEdPORTAL*. 2010;6(8129).
19. Polvani S, Mammucari M, Zuppiroli A, Bandini F, Milli M, Fioretto L, et al. Narrative medicine, a model of clinical governance: The experience of the Local Health Authority of Florence in Italy. *Clinical Practice*. 2014;11(5):493-9.
20. Small LC, Feldman LS, Oldfield BJ. Using Narrative Medicine to Build Community Across the Health Professions and Foster Self-Care. *J Radiol Nurs*. 2017;36(4):224-7.

21. Spike J. Patient-Centered Medicine: Writing Your Patient's Life Story. *MedEdPORTAL*. 2008;4(793).
22. Walker MR, Zúñiga D, Triviño X. Narrativa y formación docente: la experiencia de 5 años de un taller de escritura. *Revista Medica de Chile*. 2012;140(5):659-66.
23. Winkel AF, Hermann N, Graham MJ, Ratan RB. No time to think: making room for reflection in obstetrics and gynecology residency. *J Grad Med Educ*. 2010;2(4):610-5.
24. Wohlmann A, Halstein M. Narrative Medizin: Ein Pilotprojekt im Skills Lab der Universitätsmedizin Mainz. *ZFA (Stuttgart)*. 2016;92(11):456-60.
25. Zohouri M, Amini M, Sagheb MM. Fourth year medical students' reflective writing on "Death of Ivan Ilych": a qualitative study. *J Adv Med Educ Prof*. 2017;5(2):73-7.
26. Aronson L, Schwalbe W. The art and craft of writing for self-care and narrative advocacy: A workshop in reflective and public writing. *J Pain Symptom Manage*. 2015;49(2):322.
27. Ball SC. Enhancing medicine subinternship through narrative medicine. *J Gen Intern Med*. 2011;26:S617.
28. Balmer D, Gill A, Nuila R. Integrating narrative medicine into clinical care. *Med Educ*. 2016;50(5):581-2.
29. Bhavaraju VL, Miller S. Faculty development in narrative medicine: using stories to teach, learn, and thrive. *J Grad Med Educ*. 2014;6(2):355-6.
30. Elliott D, Schaff P, Woehrle T, Walsh A, Trial J. Narrative Reflection in Family Medicine Clerkship - Cultural Competence in the Third Year Required Clerkships. *MedEdPORTAL*. 2010;6(1153).
31. Schaff P. Donning the White Coat: The Narrative Threads of Professional Development. *J LearnThrough the Arts*. 2006;2(1):21.
32. Heller EA, Heller FE. Narrative medicine: A practical application for using writing as a clinical intervention with cancer patients, caregivers and the clinicians that care for them. *Psycho-Oncology*. 2016;25:10.
33. Hellerstein DJ. "The City of the Hospital": On Teaching Medical Students to Write. *J Med Humanit*. 2015;36(4):269-89.
34. Hurst M, Irvine C. Stories of the end: A narrative medicine curriculum to reframe death and dying. *Our changing journey to the end: Reshaping death, dying, and grief in America: New paths of engagement; New venues in the search for dignity and grace, Vols 1-2*. Santa Barbara, CA, US: Praeger/ABC-CLIO; 2014. p. 85-99.
35. Jacobs ZG, Sgro G. Pittsburgh narratives: A multidisciplinary workshop in narrative medicine. *J Gen Intern Med*. 2017;32(2):S697-S8.
36. Kissler MJ, Saxton B, Nuila R, Balmer DF. Professional Formation in the Gross Anatomy Lab and Narrative Medicine: An Exploration. *Acad Med*. 2016;91(6):772-7.
37. Lane-Reticker A, Fogel C. Introducing a humanities focus into a curriculum for midcareer HPM trainees. *J Pain Symptom Manage*. 2012;43(2):446.
38. Machado MC, Lobo Antunes J. Narrativa da Doença: Uma Disciplina Optativa na Faculdade de Medicina de Lisboa. *Acta medica portuguesa*. 2016;29(12):790-2.
39. Mark MSJ, Todd K, Todd D. The language of illness: The art of telling, listening, and self-care through narrative medicine. *J Pain Symptom Manage*. 2017;53(2):321-2.
40. Moss HA, Winkel AF, Jewell A, Musa F, Mitchell L, Speed E, et al. Narrative medicine: Using reflective writing workshops to help house staff address the complex and challenging nature of caring for gynecologic oncology patients. *Gynecol Oncol*. 2014;133:73.

- 1  
2  
3 41. Robeson R, King NMP. Performable Case Studies in Ethics Education. Healthcare  
4 (Basel, Switzerland). 2017;5(3).  
5 42. Roy R. Teaching Cultural Sensitivity through Literature and Reflective Writing. Virtual  
6 Mentor. 2007;9(8):543-6.  
7 43. Shankar PR. A voluntary medical humanities module in a medical college in Western  
8 Nepal: participant feedback. Teach Learn Med. 2009;21(3):248-53.  
9 44. Winkel AF. Narrative Medicine: A Writing Workshop Curriculum for Residents.  
10 MedEdPORTAL. 2016;12(10493).  
11 45. Winkel AF, Feldman N, Moss H, Jakalow H, Simon J, Blank S. Narrative Medicine  
12 Workshops for Obstetrics and Gynecology Residents and Association With Burnout Measures.  
13 Obstet Gynecol. 2016;128 Suppl 1:27s-33s.  
14  
15  
16  
17  
18  
19  
20  
21  
22  
23  
24  
25  
26  
27  
28  
29  
30  
31  
32  
33  
34  
35  
36  
37  
38  
39  
40  
41  
42  
43  
44  
45  
46  
47  
48  
49  
50  
51  
52  
53  
54  
55  
56  
57  
58  
59  
60



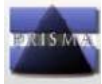

# PRISMA 2009 Checklist

| Section/topic                      | #  | Checklist item                                                                                                                                                                                                                                                                                              | Reported on page # |
|------------------------------------|----|-------------------------------------------------------------------------------------------------------------------------------------------------------------------------------------------------------------------------------------------------------------------------------------------------------------|--------------------|
| <b>TITLE</b>                       |    |                                                                                                                                                                                                                                                                                                             |                    |
| Title                              | 1  | Identify the report as a systematic review, meta-analysis, or both.                                                                                                                                                                                                                                         | 1                  |
| <b>ABSTRACT</b>                    |    |                                                                                                                                                                                                                                                                                                             |                    |
| Structured summary                 | 2  | Provide a structured summary including, as applicable: background; objectives; data sources; study eligibility criteria, participants, and interventions; study appraisal and synthesis methods; results; limitations; conclusions and implications of key findings; systematic review registration number. | 2-4                |
| <b>INTRODUCTION</b>                |    |                                                                                                                                                                                                                                                                                                             |                    |
| Rationale                          | 3  | Describe the rationale for the review in the context of what is already known.                                                                                                                                                                                                                              | 6-7                |
| Objectives                         | 4  | Provide an explicit statement of questions being addressed with reference to participants, interventions, comparisons, outcomes, and study design (PICOS).                                                                                                                                                  | 7-8                |
| <b>METHODS</b>                     |    |                                                                                                                                                                                                                                                                                                             |                    |
| Protocol and registration          | 5  | Indicate if a review protocol exists, if and where it can be accessed (e.g., Web address), and, if available, provide registration information including registration number.                                                                                                                               | N/A                |
| Eligibility criteria               | 6  | Specify study characteristics (e.g., PICOS, length of follow-up) and report characteristics (e.g., years considered, language, publication status) used as criteria for eligibility, giving rationale.                                                                                                      | 8-9                |
| Information sources                | 7  | Describe all information sources (e.g., databases with dates of coverage, contact with study authors to identify additional studies) in the search and date last searched.                                                                                                                                  | 9-10;<br>Appendix  |
| Search                             | 8  | Present full electronic search strategy for at least one database, including any limits used, such that it could be repeated.                                                                                                                                                                               | 9-10;<br>Appendix  |
| Study selection                    | 9  | State the process for selecting studies (i.e., screening, eligibility, included in systematic review, and, if applicable, included in the meta-analysis).                                                                                                                                                   | 10-12              |
| Data collection process            | 10 | Describe method of data extraction from reports (e.g., piloted forms, independently, in duplicate) and any processes for obtaining and confirming data from investigators.                                                                                                                                  | 10-12              |
| Data items                         | 11 | List and define all variables for which data were sought (e.g., PICOS, funding sources) and any assumptions and simplifications made.                                                                                                                                                                       | 10-12              |
| Risk of bias in individual studies | 12 | Describe methods used for assessing risk of bias of individual studies (including specification of whether this was done at the study or outcome level), and how this information is to be used in any data synthesis.                                                                                      | 10-12              |
| Summary measures                   | 13 | State the principal summary measures (e.g., risk ratio, difference in means).                                                                                                                                                                                                                               | 10-12              |
| Synthesis of results               | 14 | Describe the methods of handling data and combining results of studies, if done, including measures of consistency (e.g., I <sup>2</sup> ) for each meta-analysis.                                                                                                                                          | 10-12              |

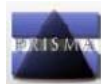

# PRISMA 2009 Checklist

Page 1 of 2

| Section/topic                 | #  | Checklist item                                                                                                                                                                                           | Reported on page #             |
|-------------------------------|----|----------------------------------------------------------------------------------------------------------------------------------------------------------------------------------------------------------|--------------------------------|
| Risk of bias across studies   | 15 | Specify any assessment of risk of bias that may affect the cumulative evidence (e.g., publication bias, selective reporting within studies).                                                             | 10-12                          |
| Additional analyses           | 16 | Describe methods of additional analyses (e.g., sensitivity or subgroup analyses, meta-regression), if done, indicating which were pre-specified.                                                         | 10-12                          |
| <b>RESULTS</b>                |    |                                                                                                                                                                                                          |                                |
| Study selection               | 17 | Give numbers of studies screened, assessed for eligibility, and included in the review, with reasons for exclusions at each stage, ideally with a flow diagram.                                          | Figure 1; Table 1              |
| Study characteristics         | 18 | For each study, present characteristics for which data were extracted (e.g., study size, PICOS, follow-up period) and provide the citations.                                                             | 12-17; Tables; Appendix        |
| Risk of bias within studies   | 19 | Present data on risk of bias of each study and, if available, any outcome level assessment (see item 12).                                                                                                | 12-17; 24-25; Tables; Appendix |
| Results of individual studies | 20 | For all outcomes considered (benefits or harms), present, for each study: (a) simple summary data for each intervention group (b) effect estimates and confidence intervals, ideally with a forest plot. | 12-17; Tables; Appendix        |
| Synthesis of results          | 21 | Present results of each meta-analysis done, including confidence intervals and measures of consistency.                                                                                                  | 12-17; Tables                  |
| Risk of bias across studies   | 22 | Present results of any assessment of risk of bias across studies (see Item 15).                                                                                                                          | 12-17; 24-25                   |
| Additional analysis           | 23 | Give results of additional analyses, if done (e.g., sensitivity or subgroup analyses, meta-regression [see Item 16]).                                                                                    | 12-17                          |
| <b>DISCUSSION</b>             |    |                                                                                                                                                                                                          |                                |
| Summary of evidence           | 24 | Summarize the main findings including the strength of evidence for each main outcome; consider their relevance to key groups (e.g., healthcare providers, users, and policy makers).                     | 17-23                          |
| Limitations                   | 25 | Discuss limitations at study and outcome level (e.g., risk of bias), and at review-level (e.g., incomplete retrieval of identified research, reporting bias).                                            | 24-25                          |
| Conclusions                   | 26 | Provide a general interpretation of the results in the context of other evidence, and implications for future research.                                                                                  | 25-26                          |
| <b>FUNDING</b>                |    |                                                                                                                                                                                                          |                                |
| Funding                       | 27 | Describe sources of funding for the systematic review and other support (e.g., supply of data); role of funders for the systematic review.                                                               | 35                             |

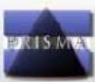

# PRISMA 2009 Checklist

- 1
- 2
- 3
- 4
- 5
- 6
- 7
- 8
- 9
- 10
- 11
- 12
- 13
- 14
- 15
- 16
- 17
- 18
- 19
- 20
- 21
- 22
- 23
- 24
- 25
- 26
- 27
- 28
- 29
- 30
- 31
- 32
- 33
- 34
- 35
- 36
- 37
- 38
- 39
- 40
- 41
- 42
- 43
- 44
- 45
- 46
- 47

For more information, visit: [www.prisma-statement.org](http://www.prisma-statement.org).

For peer review only

# BMJ Open

## Content and Outcomes of Narrative Medicine Programs: A Systematic Review of the Literature through 2017

|                               |                                                                                                                                                                                                                                                                                                                                                                                                                                                                                                                     |
|-------------------------------|---------------------------------------------------------------------------------------------------------------------------------------------------------------------------------------------------------------------------------------------------------------------------------------------------------------------------------------------------------------------------------------------------------------------------------------------------------------------------------------------------------------------|
| Journal:                      | <i>BMJ Open</i>                                                                                                                                                                                                                                                                                                                                                                                                                                                                                                     |
| Manuscript ID                 | bmjopen-2019-031568                                                                                                                                                                                                                                                                                                                                                                                                                                                                                                 |
| Article Type:                 | Research                                                                                                                                                                                                                                                                                                                                                                                                                                                                                                            |
| Date Submitted by the Author: | 09-May-2019                                                                                                                                                                                                                                                                                                                                                                                                                                                                                                         |
| Complete List of Authors:     | Di Frances, Christy; Boston University School of Medicine, Medicine; Childs, Ellen; Boston University School of Public Health Pasco, John; Boston University School of Medicine Trinquart, L; Boston University School of Public Health Flynn, David; Boston University School of Medicine Wingerter, Sarah; Boston University School of Medicine Bhasin, Robina; Boston University School of Medicine Demers, Lindsay; Boston University School of Medicine Benjamin, Emelia; Boston University School of Medicine |
| Keywords:                     | MEDICAL EDUCATION & TRAINING, MEDICAL ETHICS, EDUCATION & TRAINING (see Medical Education & Training)                                                                                                                                                                                                                                                                                                                                                                                                               |
|                               |                                                                                                                                                                                                                                                                                                                                                                                                                                                                                                                     |

SCHOLARONE™  
Manuscripts

1  
2  
3  
4  
5  
6 **Content and Outcomes of Narrative Medicine Programs:**  
7  
8 **A Systematic Review of the Literature through 2017**  
9  
10

11  
12  
13  
14 Christy D. Di Frances, PhD, MA,\* Ellen Childs, PhD,\* John Carlo Pasco, MS, Ludovic  
15 Trinquart, PhD, David B. Flynn, MS(LIS), Sarah L. Wingerter, MD, Robina M. Bhasin,  
16 EdM, Lindsay B. Demers, PhD, MS, Emelia J. Benjamin, MD, ScM  
17

18  
19 *\*Christy D. Di Frances and Ellen Childs contributed equally to this paper.*  
20  
21

22  
23 **Christy D. Di Frances** is Assistant Professor and Director of the Narrative Writing  
24 Program, Department of Medicine, Boston University School of Medicine, Boston, MA,  
25 USA. ORCID: 0000-0002-0130-0326.  
26

27  
28 **Ellen Childs** is a Research Scientist and Research Instructor in the Department of Law &  
29 Law Policy, Boston University School of Public Health, Boston, MA, USA. ORCID: 0000-  
30 0001-6177-8412.  
31

32  
33 **John Carlo Pasco** is a medical student at Boston University School of Medicine, Boston,  
34 MA, USA. ORCID: 0000-0001-7125-1147.  
35

36  
37 **Ludovic Trinquart** is Assistant Professor of Biostatistics, Boston University School of  
38 Public Health, Boston, MA, USA. ORCID: 0000-0002-3028-4900.  
39

40  
41 **David B. Flynn**, MS(LIS) is Assistant Professor and Assistant Director of Library &  
42 Information Management Education, Alumni Medical Library, Boston University School  
43 of Medicine, Boston, MA, USA. ORCID: 0000-0002-7494-2098.  
44

45  
46 **Sarah L. Wingerter** is Assistant Professor, Department of Pediatrics Emergency  
47 Medicine, Boston University School of Medicine, Boston, USA, MA. ORCID: 0000-0002-  
48 0859-5972  
49

50  
51 **Robina M. Bhasin** is Assistant Professor and Director of Faculty Development and  
52 Diversity, Department of Medicine, and Director of Faculty Development, Boston  
53 University Medical Campus, Boston, MA, USA. ORCID: 0000-0002-2107-6595.  
54

55  
56 **Lindsay B. Demers** is Assistant Professor and Director of the Education Evaluation Core,  
57 Boston University School of Medicine, Boston, MA, USA. ORCID: 0000-0001-8119-1002  
58  
59

1  
2  
3  
4  
5  
6  
7  
8  
9  
10  
11  
12  
13  
14  
15  
16  
17  
18  
19  
20  
21  
22  
23  
24  
25  
26  
27  
28  
29  
30  
31  
32  
33  
34  
35  
36  
37  
38  
39  
40  
41  
42  
43  
44  
45  
46  
47  
48  
49  
50  
51  
52  
53  
54  
55  
56  
57  
58  
59  
60

## Content and Outcomes of Narrative Medicine Programs: A Systematic Review of the Literature through 2017

**Emelia J. Benjamin** is Assistant Provost for Faculty Development Boston University Medical Campus, and Professor, Department of Medicine, School of Medicine and Department of Epidemiology, School of Public Health, Boston University, Boston, MA, USA. ORCID: 0000-0003-4076-2336.

### Corresponding Author

Ellen Childs, PhD  
Research Scientist, Research Instructor  
Health Law, Policy & Management  
Boston University School of Public Health  
Email: [echilds@bu.edu](mailto:echilds@bu.edu) | Office Telephone: +1 617.358.2775

### Article Word Count

4,603 words

## Content and Outcomes of Narrative Medicine Programs: A Systematic Review of the Literature through 2017

### Abstract

### Objectives

Narrative Medicine incorporates stories into health sciences paradigms as fundamental aspects of the human experience. The aim of this systematic review is to document objectives, content, and evaluation outcomes of narrative medicine programs implemented in academic medicine and health sciences with the goal of providing recommendations regarding best practices for future narrative-based education.

### Methods

The authors conducted a systematic review of literature published through 2017. Eligible programming included textual analysis/close reading of published literature and creative/reflective writing. Qualifying participants comprised individuals from health sciences disciplines at varying levels. The authors reviewed and categorized program goals, content, and evaluation activities.

### Results

Of 1,712 identified records, 45 records (40 unique programs) were included. The authors documented program scope and evaluation design/methods to assess participant satisfaction and program efficacy. Evaluation methods lacked consistency, with only 75% (n=30) of programs reporting any form of evaluation. Some programs lacked thorough evaluations descriptions. Quantitative and qualitative evaluations deemed as well described assessed participant satisfaction and various competencies. Fifteen programs used

## Content and Outcomes of Narrative Medicine Programs: A Systematic Review of the Literature through 2017

quantitative evaluation (7 well described), whereas 26 programs used qualitative evaluation (22 well described). Well-described quantitative evaluations relied on 20 different measures (7 validated) and showed evidence of high participant satisfaction and pre-post improvement in empathy, perspective-taking/reflection, resilience and burnout detection/mitigation, confidence/personal accomplishment, relevance to work, and pedagogical skills. A median of 90.5% of participants agreed or strongly agreed that the program had positive outcomes. Qualitative evaluation identified high participant satisfaction and improvement in relationship-building, empathy, perspective-taking/reflection, resilience and burnout detection/mitigation, confidence and personal accomplishment, narrative competence, relevance to work, pedagogical skills, ethical inquiry, cultural competence, and institutional impact.

### Conclusion

Evaluation suggests that narrative medicine programming leads to high participant satisfaction and positive outcomes across various competencies. The authors suggest best practices and innovative future directions for the implementation and evaluation of narrative medicine programs.



## Content and Outcomes of Narrative Medicine Programs: A Systematic Review of the Literature through 2017

### Article Summary

#### Strengths and Limitations of this Study

- The inclusion criteria based record eligibility upon the scope, participants, and educational activities of narrative medicine programming implemented within academic health sciences worldwide through 2017.
- The research strategy involved creating and executing optimized searches of five major electronic databases—PubMed, Embase, PsycINFO, ERIC, and MedEdPORTAL—and generated 1,264 records after the removal of duplicates.
- Data analysis was accomplished through independent screening by members of the research team, resulting in the selection of forty programs for inclusion in the systematic review.
- Program information related to scope, participants, educational activities, and evaluation design/methods was thematically coded to facilitate data analysis; some degree of subjectivity was inevitable due to the complexities inherent to synthesizing mixed data from educational evaluations utilizing varying methodologies.
- Evaluation designs and methods were examined for rigor and well-described quantitative and qualitative outcomes were investigated to examine participant satisfaction and learning, with qualitative studies highlighting a more nuanced breadth of outcomes regarding personal and professional benefits for participants.

## Content and Outcomes of Narrative Medicine Programs: A Systematic Review of the Literature through 2017

### Introduction

Narrative medicine (NM) is a framework for medicine and health sciences that values individuals' stories and experiences as integral aspects of the lived experience of health and illness. Historically, the fields of knowledge associated with medicine/science and narrative/humanities were more integrated until about the nineteenth century.<sup>1</sup> Likewise, the proliferation of specialization within medicine is a relatively modern conceptualization that has necessitated advanced technical training, leaving less space in educational curricula for the cultivation of humanistic disciplines.<sup>2</sup> Significantly, whereas the recommendations of the 1910 Flexner Report<sup>3</sup> pertaining to science-focused pre-medical and medical curricula reform have been heeded, its implications related to the importance of broader, humanities-focused training for aspiring physicians have gone largely neglected.<sup>4,5</sup> However, with the rapid evolution of twentieth-century medical technology, educational paradigms must shift to prepare well-rounded clinical and research professionals.<sup>4,6,7</sup> In contemporary healthcare models, which sometimes fail to deliver holistic, patient-centered care, the core tenets of NM have emerged as a means of enhancing clinical care and promoting wellness.

Scholarly discussion of literature and medicine surfaced in academic literature in the 1970s.<sup>8</sup> By 1995, one third of American medical schools had incorporated literature courses into their curricula.<sup>9</sup> Rita Charon introduced the term *narrative medicine* into the medical lexicon in 2001.<sup>8,10,11</sup> NM continues to evolve as a framework for healthcare based on Charon's assertion that: "The effective practice of medicine requires narrative competence, that is, the ability to acknowledge, absorb, interpret, and act on the stories and

## Content and Outcomes of Narrative Medicine Programs: A Systematic Review of the Literature through 2017

plights of others. Medicine practiced with narrative competence, called *narrative medicine*, is proposed as a model for humane and effective medical practice.”<sup>11</sup>

The integration of narrative and medicine offers benefits to healthcare providers as well as to patients, since the NM framework draws upon literature’s unique ability to augment clinical competencies, enhance the moral imagination, and foster interpersonal understanding.<sup>9,12</sup> Narrative-based education shows promise for promoting communication,<sup>13</sup> cultural competence,<sup>14</sup> empathy,<sup>15-17</sup> and professionalism,<sup>18</sup> as well as for enhancing vitality and mitigating burnout.<sup>19-21</sup> To reap the benefits associated with NM, many academic medical institutions have implemented humanities-based educational initiatives into the curricula.<sup>22</sup> Most NM programs utilize a combination of activities, including reading literary narratives, participating in group discussion, engaging in writing exercises, workshopping peer narratives, interviewing patients, and creating portfolios.

To date, however, few studies exist that examine and interpret efficacy trends in NM programming as a whole, nor does the current literature assess overarching unmet needs. We report a systematic review of the objectives, contents, and evaluation outcomes of existing NM programs as a means of answering the research question: how effective is the implementation and evaluation of NM programs in academic medicine and health sciences? We also provide best-practice recommendations and new directions for future narrative-based programming.

Three prior systematic reviews have considered specific aspects of NM. Barber and Moreno-Leguizamon examined whether NM education fosters compassionate care for

## Content and Outcomes of Narrative Medicine Programs: A Systematic Review of the Literature through 2017

adult patients.<sup>23</sup> Chen and Forbes concluded that reflective writing—one component of NM—may enhance empathy in medical students and thus could warrant inclusion in medical school curricula.<sup>24</sup> Fioretti et al. focused on the experience of patients and their caregivers through a lens of NM and indicated a need for clarity and specificity in NM research protocols.<sup>25</sup>

To our knowledge, no systematic review has addressed the overall effectiveness of NM programs offered to healthcare professionals and implemented in academic health sciences centers, including medical schools and hospitals. We sought to identify areas in which innovative NM programming may meet existing needs for both clinicians and biomedical researchers at all career stages, including students, residents, clinical and research fellows, and faculty. In addition, we identified areas for improvement in the reporting of the design and evaluation of NM programs.

### Methods

#### Criteria for selecting studies for this review

To be eligible for inclusion in the systematic review, a record had to document NM programming implemented within academic health sciences. We excluded articles, abstracts, commentary, or perspective pieces focused exclusively on NM theory.

Record eligibility also was contingent on the constituencies to which NM programming was offered. We considered a broad target audience consisting of one or more of the following: 1) graduate medical, dental, or health sciences students, including candidates for

## Content and Outcomes of Narrative Medicine Programs: A Systematic Review of the Literature through 2017

MD, DMD, PhD, MS, and MPH degrees; 2) undergraduate or graduate nursing and allied health students; 3) medical, dental, nursing, or health sciences trainees, including residents, clinical fellows, and research fellows; 4) nurses; 5) allied health professionals; 6) faculty in the medical, dental, and health sciences; and 7) non-faculty physicians.

A third inclusion criterion involved the educational components of NM training. The history of literature and medicine is grounded in both literary analysis and narrative writing,<sup>9</sup> although some scholars consider reflective/creative writing to be a relatively recent addition to NM programming.<sup>8</sup> Nevertheless, writing is a singularly effective means of fostering reflection.<sup>26</sup> Therefore, we specified that, to be eligible for the systematic review, NM trainings had to include **both** essential components of NM imbedded in the programmatic core: 1) textual analysis/close reading of published literature (e.g. poetry, fiction, creative non-fiction) and 2) creative/reflective writing.

### Search methods for identification of studies

We consulted the Boston University School of Medicine Assistant Director of Library and Information Management Education to design a search strategy for the systematic review. Our information sources included five major databases: PubMed, Embase, PsycINFO, ERIC, and MedEdPORTAL. PubMed—an online repository of the US National Library of Medicine, National Institutes of Health—is home to over 29 million citations in the realm of biomedical literature. Likewise, Embase indexes significant biomedical literature from across the globe. PsycINFO, the expansive database of the American Psychological Association, focuses on up-to-date behavioral and social science research. ERIC represents

## Content and Outcomes of Narrative Medicine Programs: A Systematic Review of the Literature through 2017

the U.S. Department of Education's Institute of Education Sciences online research library. MedEdPORTAL is a database of program curricula provided by the Association of American Medical Colleges. Strategies were optimized for each database to make the best use of that resource's specific Controlled Vocabulary or preferred search syntax. This is a best practice endorsed by and documented in the *Cochrane Handbook for Systematic Reviews for Interventions*.<sup>27</sup> The databases were searched in their entirety through the end of 2017. A table documenting our electronic search strategy is presented in **Supplemental Digital Appendix 1**.

### Data collection and analysis

We assessed the records identified during the literature search using a two-round, iterative process to reach consensus on eligibility (**Figure 1**),<sup>28</sup> independently screening the 1,264 record abstracts after the removal of duplicates. If an abstract was unavailable, the article text was consulted when possible. To be considered eligible, records had to meet all inclusion criteria. Based on the first round of screening, 125 records qualified for full-text assessment.

During the second screening stage, we read the full texts of records, identifying a further 80 records to exclude due to our discovering upon full text review that they did not meet our established eligibility criteria (**Figure 1**). Following the full-text screening, 45 records qualified for review.<sup>14,21,29-69</sup> However, we discovered that several qualifying records addressed identical NM programming efforts at the same institution: that is, 10 records<sup>14,21,37,38,40-44,66</sup> represented 5 programs. We considered programs represented by more than

## Content and Outcomes of Narrative Medicine Programs: A Systematic Review of the Literature through 2017

one publication type together, thus resulting in 40 unique NM programs being included in the systematic review.

We performed the data collection independently, analyzing the 40 eligible programs to identify significant information and classifying relevant data for assessing the overall effectiveness of NM in academic medical centers. We then cross-checked our results for reliability. Initially, we extracted verbatim data according to date(s) of publication; institution type; geographic location; participant information; program goals, scope, and activities; evaluation methods (**Table 1**); well-described evaluation outcomes (**Table 2, Supplemental Digital Appendix 2**); and evaluation competencies (**Table 3**). We coded and synthesized the verbatim data regarding program context, design, goals, and evaluation according to broad themes (**Supplemental Digital Appendix 3**).

Since we were particularly interested in identifying the outcomes, as well as the curricular content and goals of NM education, we paid special attention to categorizing evaluation methodology used for assessing program evaluations. We classified programs according to whether or not they were evaluated, and then differentiated the evaluated programs according to evaluation design and method. We stratified program evaluation based on the type of methods used (qualitative versus quantitative), the thoroughness of the description of the evaluation, including whether the methods and analysis strategy were discussed, and results reported.

In regards to evaluation design, programs were categorized as: 1) cross-sectional, including all programs with post-program evaluation without a comparator; 2) controlled or

## Content and Outcomes of Narrative Medicine Programs: A Systematic Review of the Literature through 2017

1  
2  
3  
4 uncontrolled pre-post test, including all programs that included both a pre-test and a post-  
5  
6 test; and 3) randomized step-wedge design, including all programs that used a step-wedge  
7  
8 design to examine program impact on participants randomized to participate at different  
9  
10 time points. We were open to including other evaluation designs, but only the three designs  
11  
12 discussed here emerged from our analysis of the NM programs included in the systematic  
13  
14 review.  
15  
16

17  
18  
19 In addition to tracking overall evaluation strategies, we used grounded analysis to analyze  
20  
21 the extracted data. Hence, program goals did not necessarily map neatly onto actual  
22  
23 outcomes. We recorded the well-described evaluation of specific NM-related competencies  
24  
25 according to the following thematic groupings: participant satisfaction, relationship-  
26  
27 building, empathy, perspective-taking and reflection, resilience and burnout  
28  
29 detection/mitigation, confidence/personal accomplishment, narrative competence,  
30  
31 relevance to work, pedagogical skills, ethical inquiry, cultural competence, and  
32  
33 institutional impact. Attentive listening practices are included in the relationship building  
34  
35 and narrative competence thematic groupings.  
36  
37  
38  
39  
40

## Results

### Descriptive Statistics

41  
42  
43  
44 **Table 1** summarizes the descriptive statistics of all 40 programs included in our review.  
45  
46

47  
48 The programs included in our review were documented and disseminated through a variety  
49  
50 of media, including articles (n=25), abstracts (n=13), *MedEdPORTAL* curricula (n=4),  
51  
52  
53  
54  
55  
56  
57  
58



## Content and Outcomes of Narrative Medicine Programs: A Systematic Review of the Literature through 2017

unpublished theses (n=2), and a book chapter (n=1). Publication dates were from 2005 to 2017, with the median year of publication being 2014.

NM programming efforts reported in the literature were concentrated in relatively high-resource settings. The bulk of trainings occurred in North America (n=32, 80.0%), followed by Europe (n=5, 12.5%), Asia (n=2, 5.0%), and South America (n=1, 2.5%). See **Supplemental Digital Appendix 4** for a map of NM program locations.

NM program participants and size varied. Programming was offered for medical students (n=19, 47.5%), faculty and non-faculty physicians (n=15, 37.5%), resident and fellow clinical trainees (n=13, 32.5%), other staff (n=7, 17.5%), nurses and nursing students (n=6, 15%), and other students (n=2, 5.0%). Some programs were open to more than one of the above constituencies. Numbers of participants ranged from 5 to 350 individuals (median, 26; Q1-Q3, 13-48); for 10 programs, participant constituency, and/or numbers were not provided.

The number of sessions offered by NM programs was highly heterogeneous, running the gamut from a single workshop or seminar to as many as 40 half-hour sessions offered over the course of a year.<sup>48</sup> The median number of sessions offered was 4 (Q1-Q3: 3-9). The number of hours of programming offered was similarly highly variable, ranging from 1 to 60, with 9 being the median (Q1-Q3: 3-20).

NM programs specified one or several educational objectives related to both narrative and clinical/medical skills. We grouped programmatic goals involving narrative skills into several categories, including the cultivation of reflection (n=17, 42.5%); communication,

## Content and Outcomes of Narrative Medicine Programs: A Systematic Review of the Literature through 2017

attentive listening, and narrative competence (n=15, 37.5%); empathy (n=13, 32.5%); resilience and burnout detection and/or reduction (n=7, 17.5%); cultural competence (n=3, 7.5%); wellness (n=3, 7.5%); narrative skills for pedagogy (n=2, 5%); and writing (n=2, 5%). Programmatic goals related to clinical/medical skills sought to employ NM to foster clinical competence (n=13, 32.5%); enhanced sense of professionalism and vocation (n=11, 27.5%); and successful medical team functioning (n=5, 12.5%).

In order to achieve the stated programming goals, NM curricula relied on a combination of activities, including group discussion, typically based on literary readings (n=34, 85.0%); writing exercises (n=32, 80%); sharing and/or workshopping participants' writing (n=25, 62.5%); reading together as a group (n=23, 57.5%); and other narrative-based exercises (n=15, 37.5%), such as conducting patient interviews and writing patients' stories, creating portfolios, participating in an online forum, and even—in two instances—presenting a play.

### NM Program Evaluation

The reporting of NM program evaluations varied across programs and publication types. Ten programs did not report any evaluation activities. For programs reporting quantitative evaluations, we identified seven as well described and eight that reported some quantitative methods but were not thoroughly described. Programs were deemed as “not well described” if they did not include full details regarding evaluation methods. See **Table 2** for explanations for programs deemed as well defined; incomplete quantitative and qualitative program evaluations are recorded in **Supplemental Digital Appendix 5**. For

## Content and Outcomes of Narrative Medicine Programs: A Systematic Review of the Literature through 2017

1  
2  
3  
4 programs reporting qualitative evaluations, we identified 22 as well described and four that  
5  
6 were not described thoroughly. Only three NM programs were deemed as having both  
7  
8 quantitative and qualitative evaluation methods that were well described.<sup>45,47,51</sup>  
9  
10

11  
12 Evaluation designs varied across NM programs and included the use of cross-sectional  
13  
14 designs, pre-post designs, and randomized step-wedge designs. Of the evaluations we  
15  
16 identified as well described, twenty-five evaluations used a cross-sectional design with a  
17  
18 post-test only. Of the evaluations utilizing a cross-sectional design, most had only an  
19  
20 immediate post-test (n=22), one had an immediate post-test and a long-term post-test (1.5  
21  
22 years later),<sup>29</sup> and one had a long-term post-test only (1.5 year).<sup>70</sup> One evaluation did not  
23  
24 report the timing of the post-test.<sup>48</sup> Of the three evaluations that used a pre-post design, two  
25  
26 did a pre-test and immediate post-test, and one did a pre-test and long-term post-test (1  
27  
28 year).<sup>21,66</sup> One evaluation used a randomized step-wedge design in which participants were  
29  
30 randomized into two groups, and the groups participated in the program at different  
31  
32 times.<sup>37,38</sup> Post-tests of program participants were compared to pre-tests of those who had  
33  
34 not yet participated in the program.  
35  
36  
37  
38  
39

40  
41 Overall, the evaluations demonstrated that NM programming can have a variety of positive  
42  
43 impacts on healthcare providers (**Tables 2 and 3**). Quantitative evaluations provide  
44  
45 evidence for modest gains in areas related to pedagogy, empathy, and perspective-taking;  
46  
47 whereas qualitative evaluations identified gains related to confidence, relevance of work,  
48  
49 institutional impact, pedagogy, relationship-building, perspective-taking and reflection,  
50  
51 resilience and burnout detection or mitigation, narrative competence, cultural competence,  
52  
53 ethical inquiry, and increased sense of personal accomplishment (**Tables 2 and 3**). In  
54  
55  
56  
57  
58  
59  
60

## Content and Outcomes of Narrative Medicine Programs: A Systematic Review of the Literature through 2017

1  
2  
3  
4 addition to evaluating the impact of the program on participants, many evaluation  
5  
6 strategies focused on evaluating participants' satisfaction of the program. NM satisfaction  
7  
8 scores were reported to be high, with the combined percent agree or strongly agree to the  
9  
10 satisfaction measures as 93.6% (our calculation). However, satisfaction outcomes were not  
11  
12 necessarily indicative of subsequent changes in the behavior or experiences of health  
13  
14 sciences professionals who engaged in the programming.  
15  
16

17  
18  
19 Of quantitative programs deemed as well described, four reported high satisfaction,<sup>45,47,59,65</sup>  
20  
21 while modest and positive but not statistically significant impacts were reported on:  
22  
23 pedagogical skills (n=1),<sup>34</sup> relevance to professional work (n=1),<sup>59</sup> resilience and burnout  
24  
25 detection/mitigation (n=1) , and confidence/increased sense of personal accomplishment  
26  
27 (n=2).<sup>21,34,66</sup> Programs that reported statistically significant programmatic impacts  
28  
29 examined increased empathy (n=2),<sup>21,51,66</sup> and increased perspective-taking/reflection  
30  
31 (n=1).<sup>21,66</sup>  
32  
33  
34  
35

36  
37 Of qualitative programs deemed as well described, 8 reported high  
38  
39 satisfaction,<sup>37,38,40,41,54,65,67,68,71</sup> while positive impacts were reported on: relationship-  
40  
41 building (n=11),<sup>14,33,35,36,39-42,45,48,61,69,70</sup> empathy (n=7),<sup>14,42,45,48,51,60,69,70</sup> perspective-  
42  
43 taking/reflection (n=5),<sup>14,33,35,36,39,42,45,60,69,70</sup> resilience and burnout detection/mitigation  
44  
45 (n=4),<sup>35,46,48,70</sup> narrative competence (n=3),<sup>37,38,40,41,45</sup> confidence/personal accomplishment  
46  
47 (n=2),<sup>29,36</sup> ethical inquiry (n=2)<sup>45,60</sup> relevance to work (n=1),<sup>29</sup> pedagogical skills (n=1),<sup>33</sup>  
48  
49 cultural competence (n=1),<sup>14,42</sup> and institutional impact (n=1).<sup>33</sup> The qualitative studies  
50  
51 highlighted a more nuanced breadth of outcomes regarding personal and professional  
52  
53 benefits for participants in NM programs.  
54  
55  
56  
57  
58  
59

## Content and Outcomes of Narrative Medicine Programs: A Systematic Review of the Literature through 2017

We observed that the stated goals of NM programs were not always reflective of the reported evaluation outcomes. Programs identified a variety of goals, but a striking number did not report actual evaluation results (n=9)<sup>30,49,50,52,55-58,72</sup> or only discussed general participant satisfaction (n=6).<sup>47,54,65,67,68,73</sup> We found the evaluation methods and outcomes of many programs to be insufficiently developed or described.

### Discussion

Our review of 40 NM programs demonstrated modest but positive varied benefits related to narrative-based education for health science professionals, reflective of the remarkable diversity of the trainings implemented. From a geographical perspective, the bulk of programs took place in North America, followed by Europe. Audiences varied, but the highest concentration of programs were targeted at medical students, followed by trainees (residents and fellows), and then faculty and non-faculty physicians. Program goals encompassed a range of narrative and clinical skills. Program activities tended to concentrate on reading and discussion, as well as on reflective writing exercises.

Most evaluation designs utilized a cross-sectional, post-test only evaluation, which did not allow evaluators to understand the relative impact of the program. Only seven programs compared participants before and after the NM training, using either a pre-post or step-wedge design. Only four programs evaluated the long-term impact of the training, with post-program evaluations conducted between one month and one and a half years after program completion. The majority of programming was evaluated by qualitative, quantitative, or mixed methods for satisfaction and/or efficacy. Despite an emphasis on the

## Content and Outcomes of Narrative Medicine Programs: A Systematic Review of the Literature through 2017

value of writing, no programs used an evaluation deemed to be well described to assess gains in writing competence/confidence, and a surprisingly high number (n=10, 25%) of NM programs provided no details regarding evaluation design or methodology.

Whereas previous systematic reviews have concluded that NM education may be beneficial in contributing to the delivery of compassionate care<sup>23</sup> and that reflective writing may help to enhance empathy in medical students,<sup>24</sup> our research builds upon the current literature to reveal a broad range of NM benefits. Our findings demonstrate that NM has shown potential for enhancing communication and team-building skills; encouraging perspective-taking and reflection; promoting empathic behavior; detecting/mitigating burnout; cultivating narrative competence; augmenting pedagogical skills, and fostering ethical inquiry.

Based on our analysis and interpretation of the programs reviewed, we recommend considering the inclusion of narrative-based education in curricula for medical/health sciences students, trainees, and faculty. We also suggest several best practices and new directions for future NM programming efforts as a means of increasing intervention efficacy and providing broader accessibility.

### **Recommended Best Practices and Future Directions for NM**

#### *Enhanced Program Evaluation Methods*

Our research has noted that a substantial number of NM programs did not report any evaluation activities, while others only evaluated general participant satisfaction. Further,

## Content and Outcomes of Narrative Medicine Programs: A Systematic Review of the Literature through 2017

in programs that were evaluated, evaluation design was highly variable, with the majority lacking assessment of long-term impact. Without carefully evaluating the short- and long-term outcomes of educational programming for gaining particular skills and competencies, it is difficult to continue assessing accurately whether NM programming addresses the unique needs of health sciences professionals in academic medicine and health sciences. Given the intense time constraints of the constituency, we submit that program evaluation is critical to ensure that time spent in a NM program is used effectively.

Quantifying the long-term impact of NM objectives, such as fostering empathy and ethical decision-making, is challenging—and certainly complicates the integration of NM training into continuing medical education curricula.<sup>74</sup> Nevertheless, education experts contend that medical ethics and humanities training, including narrative-based reasoning, is fundamental to the professional development of healthcare practitioners.<sup>75</sup> Ensuring the integration of relevant NM programming into educational curricula for the next generation of health sciences professionals requires strategic planning, thorough evaluation, and ongoing analysis. We have constructed a basic checklist for developing, implementing, evaluating, and disseminating a NM training, regardless of individualized program focus (**Supplemental Digital Appendix 6**).

### *Focus on Narrative Writing Skills*

Narrative writing has the potential to leverage storytelling as an aspect of personal and professional growth. The literature supports that faculty writing groups and workshops can promote publications and presentations,<sup>76-78</sup> improve writing skills,<sup>77,79</sup> and bolster

## Content and Outcomes of Narrative Medicine Programs: A Systematic Review of the Literature through 2017

confidence in writing.<sup>77,78,80</sup> However, we identified only one NM intervention that reported the development of writing skills as a program goal,<sup>30</sup> rather than the use of writing as a means towards achieving other stated outcomes, such as the cultivation of reflection or empathy skills. While no program reported evaluation of writing-related competencies in a manner deemed well-described, two programs reported that participants valued the opportunity to improve writing skills<sup>54</sup> and augment self-efficacy in writing/leading writing exercises.<sup>34</sup>

NM programming that includes training in writing competencies and self-efficacy represents an innovative educational model for accomplishing both the traditional goals of NM—e.g. empathy, communication, professionalism, resilience—and the additional outcome of fostering writing competencies. We recommend expanding future NM program objectives to include the development of enhanced writing skills and self-efficacy related to the writing process as measurable learning outcomes. Such a goal may be accomplished through a blend of expert-led instruction in literary theory, close reading of published literary texts, and workshopping of peer narratives, with the goal of coaching faculty to generate perspective pieces, advocacy narratives, creative writing projects, and educational texts for submission to peer-reviewed journals.

### *NM for Scientists*

To date, a dearth of research exists regarding the occurrence and effectiveness of NM programming for scientists, and we submit that this knowledge gap should be addressed by the implementation and evaluation of narrative-based education for this constituency. The



## Content and Outcomes of Narrative Medicine Programs: A Systematic Review of the Literature through 2017

NM programs analyzed in the current review were overwhelmingly geared toward clinical professionals, including physicians, nurses, clinical fellows, residents, medical students, and clinically-oriented staff. However, many of the programs' positive outcomes may be equally valuable for research faculty, postdoctoral fellows, and graduate students in the health sciences, who may benefit from narrative-based training to enhance communication and relationship-building skills, writing and teaching competencies, cross-cultural awareness, understanding of ethical inquiry and behavior, cross-disciplinary understanding, and professional identity formation.

While much attention has been given to clinician stress and burnout, NM also may prove beneficial for researchers navigating the stressors of a historically challenging funding climate. The inclusion of both clinical and research-focused professionals in NM programming has potential to foster interdisciplinary understanding, build affinity, and offer collaborative opportunities to groups who tend to operate in silos.

### *NM for Detecting and Mitigating Burnout*

Given current concerns surrounding stress and burnout among professionals in medicine and health sciences<sup>81-86</sup> a need exists to identify and implement sustainable programming for cultivating resilience. Six programs evaluated the impact of NM education on resilience and burnout detection and/or mitigation.<sup>21,35,46,48,66,70</sup> While in one case quantitative evaluations of burnout after an NM training did not demonstrate statistical significance,<sup>67</sup> other programs suggested positive results regarding the use of NM for burnout identification and reduction.

## Content and Outcomes of Narrative Medicine Programs: A Systematic Review of the Literature through 2017

Although NM programs offer a promising initial step towards employing narrative-based education for resilience, additional research is needed to demonstrate the potential impact of NM education on physician and scientist wellness, particularly in specialties and contexts with high burnout rates. While preliminary studies have explored how narrative practice and reflective practice may be an effective intervention for front-line medical responders working in the burnout-prone context of international humanitarian frameworks,<sup>87,88</sup> reports on research, development, and implementation of NM programming for such constituencies are scarce. Therefore, we suggest further development and evaluation of narrative-based education focused on burnout detection and mitigation—with the potential for adapting successful NM programming to burnout-prone health care contexts beyond academic medicine, including among humanitarian and military front-line medical providers.

### *NM for Cultural Competence*

Several programs included in our review expressed increased cultural competence, communication and/or sensitivity as primary or secondary goals.<sup>14,42,54,60,62</sup> Given the power of literature for developing empathy<sup>89</sup> and expanding the moral imagination,<sup>9</sup> it is probable that NM programming could serve a unique role in fostering cultural sensitivity and illuminating unconscious bias, particularly since literature has been posited as a powerful vehicle for exploring themes of racial justice within medicine.<sup>90</sup> We therefore recommend additional research into NM education as a vehicle for promoting cultural competence,<sup>91</sup> which might be accomplished in a variety of ways, including by imbedding

## Content and Outcomes of Narrative Medicine Programs: A Systematic Review of the Literature through 2017

narrative-based learning modules into unconscious bias trainings already taking place within academic health sciences.

### *NM for Low-Resource Settings*

From a global perspective, NM programming efforts to date have been based primarily in high-resourced medical areas. There are opportunities for educational partnerships among institutions located in disparate geographic and socioeconomic settings both within the United States and abroad. Certainly the appearance of NM programming worldwide demonstrates a burgeoning global interest in the field, with 20.0% of training having been implemented outside the United States in recent years: Nepal in 2009,<sup>63</sup> the United Kingdom in 2010,<sup>39</sup> Canada and Chile in 2012,<sup>37,38,65</sup> France in 2013,<sup>47</sup> Italy in 2014,<sup>61</sup> Germany and Portugal in 2016,<sup>57,68</sup> and Iran in 2017.<sup>69</sup>

The increasing interest in NM education on a global level, including in some lower-resource settings, offers potential for development of scalable curricula that can be shared with resource-limited locations where humanities and medicine training curricula may still be scarce, as was reported to be the case in Nepal.<sup>63</sup> One potential strategy for implementing NM programming in lower-resource settings would be to create curricula for blended online and in-person educational modules. This type of program could leverage videoconferencing technology to connect first-time course implementers with more experienced facilitators located in higher-resource settings, allowing for peer mentoring using NM as both a healthcare framework and an educational tool.

## Content and Outcomes of Narrative Medicine Programs: A Systematic Review of the Literature through 2017

### Limitations

We acknowledge several limitations to our systematic review. First, thirteen (29%) qualifying records were abstracts, which by nature provide far less information than articles, curricula, unpublished theses, or book chapters. Second, our results are inevitably subject to potential publication bias, since programs with positive results are more likely to have been submitted and selected for publication. While the NM records made little mention of negative or neutral aspects of NM programming, such factors undoubtedly exist, including institutional funding limitations, faculty unfamiliarity, and participant time constraints. Furthermore, we noted the stated definition of NM to be inconsistent even within publications/programs that met our inclusion criteria, a factor which may have led to some lack of consistency within reports of program objectives, evaluations, and outcomes.

We recognize the inevitable complexities and potential pitfalls of synthesizing mixed data from educational evaluations that have utilized varying methodologies.<sup>92</sup> In particular, given our reliance on qualitative analysis when synthesizing the data, there is inevitably some element of subjectivity involved in data reporting and interpretation. Although we have made a good faith effort in our work, we do recognize that a degree of subjectivity is inevitable.

Finally, while we have provided discussion regarding ways in which the general thematic schema of NM program effectiveness may be transferable to future educational efforts, we nevertheless are aware that it is unclear how transferable the results of any specific program

## **Content and Outcomes of Narrative Medicine Programs: A Systematic Review of the Literature through 2017**

may be, since many dimensions influence the impact of NM programming, including the unique participants, facilitator, curriculum, and frequency/duration of sessions. To a great extent, however, this challenge supersedes NM and remains ubiquitous to medical education as a whole.

### **Conclusion**

Despite being a relative newcomer to contemporary medical education, NM programs already have resulted in a range of positive outcomes for health sciences professionals, including enhancing narrative competence, communication, and empathy; detecting and mitigating burnout; fostering reflection with regard to professional identity formation; promoting team-building; and facilitating teaching competencies. There are doubtless institutional barriers to overcome in implementing NM programming, including obtaining sufficient institutional or outside funding, augmenting conceptual understanding with medical education committees regarding the positive outcomes of narrative-based education, and providing protected time for faculty/trainee participation in NM curricula. Nevertheless, NM education shows promise for addressing some of the most pressing concerns for today's health sciences professionals, including high suicide rates, depression, and burnout compounded with declining research funding, shorter patient visit times, mounting paperwork, and decreased job satisfaction. Such challenges necessitate innovative solutions—and NM may prove to be a highly resource-effective solution.

### **Implications for Research**

We advise that NM programming best practices and future directions should include the

**Content and Outcomes of Narrative Medicine Programs:  
A Systematic Review of the Literature through 2017**

1  
2  
3  
4 use of robust evaluation mechanisms; inclusion of writing training as an additional  
5  
6 learning outcome; and the development and implementation of NM for researchers,  
7  
8 burnout-prone providers/contexts, cultural competence trainings, and lower-resource  
9  
10 settings. We hope our systematic review helps to further the integration of narrative-based  
11  
12 education into curricula at all levels in academic health sciences with a view toward  
13  
14 nurturing resilient, reflective, and emotionally intelligent professionals who, in turn, will  
15  
16 provide better patient care, health sciences education and research, and public health.  
17  
18  
19  
20  
21  
22  
23  
24  
25  
26  
27  
28  
29  
30  
31  
32  
33  
34  
35  
36  
37  
38  
39  
40  
41  
42  
43  
44  
45  
46  
47  
48  
49  
50  
51  
52  
53  
54  
55  
56  
57  
58  
59  
60

## Content and Outcomes of Narrative Medicine Programs: A Systematic Review of the Literature through 2017

### Tables

**Table 1:** Descriptive Statistics of 40 Programs in Narrative Medicine Systematic Review

| <b>Publication Year</b>                                                                    | 2014 [2011-2016] <sup>a</sup> |
|--------------------------------------------------------------------------------------------|-------------------------------|
| <b>Publication Type<sup>b</sup></b>                                                        |                               |
| Article                                                                                    | 25 <sup>c</sup> (55.5)        |
| Abstract                                                                                   | 13 <sup>c</sup> (28.8)        |
| Curriculum                                                                                 | 4 <sup>c</sup> (8.8)          |
| Unpublished Theses                                                                         | 2 (4.4)                       |
| Book Chapter                                                                               | 1 (2.2)                       |
| <b>Program Location</b>                                                                    |                               |
| USA/Canada                                                                                 | 32 (80.0)                     |
| Europe                                                                                     | 5 (12.5)                      |
| South/Western Asia                                                                         | 2 (5.0)                       |
| South America                                                                              | 1 (2.5)                       |
| <b>Number of Participants</b>                                                              | 26 [13-48]                    |
| <b>Constituency<sup>d</sup></b>                                                            |                               |
| Medical Students                                                                           | 19 (47.5)                     |
| Faculty/Physician Non-Faculty                                                              | 15 (37.5)                     |
| Residents/Fellows                                                                          | 13 (32.5)                     |
| Other staff (e.g. administrators, paramedical personnel, community workers)                | 7 (17.5)                      |
| Nurses/Nursing Students                                                                    | 6 (15.0)                      |
| Other students (e.g. graduate students)                                                    | 2 (5.0)                       |
| <b>Program Goals<sup>d</sup></b>                                                           |                               |
| <i><b>Narrative Goals<sup>d</sup></b></i>                                                  |                               |
| Reflection                                                                                 | 17 (42.5)                     |
| Communication/Attentive Listening/Narrative Competence                                     | 15 (37.5)                     |
| Empathy                                                                                    | 13 (32.5)                     |
| Resilience/Burnout Detection/Mitigation                                                    | 7 (17.5)                      |
| Cultural Competence                                                                        | 3 (7.5)                       |
| Wellness                                                                                   | 3 (7.5)                       |
| Narrative Skills for Pedagogy                                                              | 2 (5.0)                       |
| Writing                                                                                    | 2 (5.0)                       |
| <i><b>Clinical/Medical Skills<sup>d</sup></b></i>                                          |                               |
| Clinical Competence                                                                        | 13 (32.5)                     |
| Professionalism and Vocation                                                               | 11 (27.5)                     |
| Medical Team Functioning                                                                   | 5 (12.5)                      |
| <b>Number of Sessions</b>                                                                  | 4 [3-9]                       |
| <b>Hours in Program</b>                                                                    | 9 [3-20]                      |
| <b>Program Activities<sup>c</sup></b>                                                      |                               |
| Group Discussion                                                                           | 34 (85.0)                     |
| Writing Exercises                                                                          | 32 (80.0)                     |
| Sharing Writing/Workshop                                                                   | 25 (62.5)                     |
| Group Reading                                                                              | 23 (57.5)                     |
| Other (e.g. interviews, observations, portfolios, writing a patient's story, online forum) | 15 (37.5)                     |
| <b>Program Evaluation Methods<sup>e</sup></b>                                              |                               |
| Quantitative – Well Described                                                              | 7 (17.5)                      |
| Quantitative – Incomplete Description                                                      | 8 (20.0)                      |
| Qualitative – Well Described                                                               | 22 (55.0)                     |

## Content and Outcomes of Narrative Medicine Programs: A Systematic Review of the Literature through 2017

|                                    |           |
|------------------------------------|-----------|
| Qualitative—Incomplete Description | 4 (10.0)  |
| None/Not Specified                 | 10 (25.0) |

---

Data are median [Q1-Q3] or frequencies (%); <sup>a</sup>2 studies in the same year counted as one program; 2 studies in different years counted as two programs; <sup>b</sup>Percentages are calculated based on 45 records. <sup>c</sup>Program was represented by more than one publication type (e.g., article and curriculum); <sup>d</sup>Responses are not mutually exclusive, so percentages are over 100%; <sup>e</sup>11 studies used a mixed methods, with both qualitative and quantitative outcomes reported, so percentages are over 100%

---

For peer review only



## Content and Outcomes of Narrative Medicine Programs: A Systematic Review of the Literature through 2017

**Table 2:** Quantitative and Qualitative Well Described Evaluations of Narrative Medicine Programs in Systematic Review<sup>a</sup>

| 2A. Quantitative Evaluations – Well Described          |                          |                                                       |                                                                                                                   |    |                |                |                  |         |
|--------------------------------------------------------|--------------------------|-------------------------------------------------------|-------------------------------------------------------------------------------------------------------------------|----|----------------|----------------|------------------|---------|
| Reference                                              | New or Validated Outcome | Outcome                                               | Outcomes– Thematic Grouping                                                                                       | N  | Pre Mean (SD)  | Post Mean (SD) | Mean Change (SD) | P Value |
| <b>Quantitative Studies Using Pre-post Test Design</b> |                          |                                                       |                                                                                                                   |    |                |                |                  |         |
| Bhavaraju VL, Miller S. <sup>34</sup>                  | New                      | Confidence in writing and leading writing exercises   | <ul style="list-style-type: none"> <li>Confidence/ Personal Accomplishment</li> <li>Pedagogical Skills</li> </ul> | 12 | 3.1            | 4.2            | 1.1              | N.R.    |
|                                                        | New                      | Confidence in leading literary discussions            | <ul style="list-style-type: none"> <li>Confidence/ Personal Accomplishment</li> <li>Pedagogical Skills</li> </ul> | 10 | 3.7            | 4.4            | 0.7              | N.R.    |
|                                                        | New                      | Integration of tools gained in training into teaching | <ul style="list-style-type: none"> <li>Pedagogical Skills</li> </ul>                                              | 10 | 2.2            | 2.7            | 0.5              | N.R.    |
| Goupy F, et al. <sup>47</sup>                          | New                      | Interest of topic                                     | <ul style="list-style-type: none"> <li>Satisfaction</li> </ul>                                                    | 41 | N/A            | 1.84 (0.82)    | N/A              | N/A     |
|                                                        | New                      | Satisfaction with choice of theme                     | <ul style="list-style-type: none"> <li>Satisfaction</li> </ul>                                                    | 41 | N/A            | 2.13 (0.72)    | N/A              | N/A     |
|                                                        | New                      | Satisfaction of discussion related to theme           | <ul style="list-style-type: none"> <li>Satisfaction</li> </ul>                                                    | 41 | N/A            | 2.30 (0.62)    | N/A              | N/A     |
| Holub PG. <sup>51</sup>                                | Validated                | JSPE – Control Group                                  | <ul style="list-style-type: none"> <li>Empathy</li> </ul>                                                         | 41 | 119.10 (15.64) | 116.15 (16.15) | - 2.95 (6.77)    | 0.001   |
|                                                        | Validated                | JSPE – Treatment Group                                |                                                                                                                   | 41 | 119.28 (9.05)  | 124.48 (8.47)  | 5.10 (7.20)      |         |
| Winkel<br>AND<br>Winkel                                | Validated                | Maslach Burnout Inventory: Emotional Exhaustion       | <ul style="list-style-type: none"> <li>Resilience and burnout detection/mitigation</li> </ul>                     | 43 | N.R.           | N.R.           | - 2.0 (8.7)      | 0.12    |
|                                                        | Validated                | Maslach Burnout Inventory: Depersonalization          | <ul style="list-style-type: none"> <li>Resilience and burnout detection/mitigation</li> </ul>                     | 43 | N.R.           | N.R.           | 0.1 (4.0)        | 0.61    |
|                                                        | Validated                | Maslach Burnout Inventory: Personal Accomplishment    | <ul style="list-style-type: none"> <li>Personal accomplishment</li> </ul>                                         | 43 | N.R.           | N.R.           | 1.2 (7.1)        | 0.70    |

## Content and Outcomes of Narrative Medicine Programs: A Systematic Review of the Literature through 2017

|                                    |           |                                              |                                  |    |      |      |             |      |
|------------------------------------|-----------|----------------------------------------------|----------------------------------|----|------|------|-------------|------|
| AF, <i>et al.</i> <sup>21,66</sup> | Validated | Interpersonal Reactivity: Empathic Concern   | • Empathy                        | 43 | N.R. | N.R. | 0.76 (5.9)  | 0.01 |
|                                    | Validated | Interpersonal Reactivity: Perspective Taking | • Perspective-taking/ Reflection | 43 | N.R. | N.R. | 21.37 (7.8) | 0.01 |

### Quantitative Studies Using Post-test Design

| <i>Reference</i>                         | <i>New or Validated Outcome</i> | <i>Outcome</i>                      | <i>Outcomes– Thematic Grouping</i> | <i>N</i> | <i>% agreement with outcome</i> |
|------------------------------------------|---------------------------------|-------------------------------------|------------------------------------|----------|---------------------------------|
| Goodrich TJ, <i>et al.</i> <sup>45</sup> | New                             | Usefulness of the training          | • Satisfaction                     | 48       | 79%                             |
|                                          | New                             | Interest of the training            | • Satisfaction                     | 48       | 88%                             |
| Moss HA, <i>et al.</i> <sup>59</sup>     | New                             | Satisfaction of training            | • Satisfaction                     | 27       | 99%                             |
|                                          | New                             | Relevance of training to work       | • Relevance to work                | 27       | 97%                             |
| Walker MR, <i>et al.</i> <sup>65</sup>   | New                             | Total Satisfaction of course        | • Satisfaction                     | 32       | 89%                             |
|                                          | New                             | Appropriateness of activities       | • Satisfaction                     | 32       | 94%                             |
|                                          | New                             | Overall experience with instructors | • Satisfaction                     | 32       | 97%                             |

### 2B. Qualitative Evaluations – Well Described<sup>b</sup>

| <i>Reference</i>                                                                  | <i>Design</i>          | <i>Timing</i>              | <i>Methods</i>                            | <i>Outcome Improved – Thematic Grouping</i>                                                                  |
|-----------------------------------------------------------------------------------|------------------------|----------------------------|-------------------------------------------|--------------------------------------------------------------------------------------------------------------|
| Arntfield SL, <i>et al.</i> <sup>29</sup>                                         | Post-test              | Immediate, 1.5 years later | Open-ended surveys; focus group           | • Confidence/ Personal Accomplishment<br>• Relevance to work                                                 |
| Balmer DF, Richards BF. <sup>33</sup>                                             | Post-test              | Immediate                  | Ethnography, content analysis, interviews | • Institutional impact<br>• Pedagogical Skills<br>• Relationship-building<br>• Perspective-taking/Reflection |
| Birigwa SN, <i>et al.</i> <sup>35</sup>                                           | Post-test              | Immediate                  | Surveys                                   | • Relationship-building<br>• Resilience and burnout detection/mitigation<br>• Perspective-taking/Reflection  |
| Bobb SJ <sup>36</sup>                                                             | Post-test              | Immediate                  | Ethnography, interviews                   | • Perspective- taking/Reflection<br>• Relationship-building<br>• Confidence/Personal accomplishment          |
| Boudreau JD, <i>et al.</i> <sup>37</sup> AND Liben S, <i>et al.</i> <sup>38</sup> | Random-ized Step Wedge | Immediate                  | Interviews                                | • Narrative competence<br>• Satisfaction                                                                     |
| Brigley S, Jasper M <sup>39</sup>                                                 | Post-test              | Immediate                  | Observation, focus groups, interviews     | • Relationship-building<br>• Perspective-taking/ Reflection                                                  |

## Content and Outcomes of Narrative Medicine Programs: A Systematic Review of the Literature through 2017

|                                                                                          |           |                |                                                                                                                    |                                                                                                                                                         |
|------------------------------------------------------------------------------------------|-----------|----------------|--------------------------------------------------------------------------------------------------------------------|---------------------------------------------------------------------------------------------------------------------------------------------------------|
| Chretien KC, <i>et al.</i> <sup>40</sup> AND<br>Chretien KC, <i>et al.</i> <sup>41</sup> | Post-test | Immediate      | Focus groups, patient interviews                                                                                   | <ul style="list-style-type: none"> <li>• Narrative competence,</li> <li>• Relationship-building,</li> <li>• Satisfaction</li> </ul>                     |
| DasGupta S, <i>et al.</i> <sup>42</sup> AND<br>Dasgupta S. <sup>14</sup>                 | Post-test | Immediate      | Focus Groups, resident evaluations                                                                                 | <ul style="list-style-type: none"> <li>• Cultural competence</li> <li>• Relationship-building</li> <li>• Empathy</li> </ul>                             |
| Goodrich TJ, <i>et al.</i> <sup>45</sup>                                                 | Post-test | Immediate      | Focus Group; program evaluation survey                                                                             | <ul style="list-style-type: none"> <li>• Empathy</li> <li>• Ethical inquiry</li> <li>• Narrative competence</li> <li>• Relationship-building</li> </ul> |
| Gordon E. <sup>46</sup>                                                                  | Post-test | Immediate      | Content analysis of essays                                                                                         | <ul style="list-style-type: none"> <li>• Resilience and burnout detection/mitigation</li> </ul>                                                         |
| Goupy F, <i>et al.</i> <sup>47</sup>                                                     | Post-test | Immediate;     | Open-ended survey                                                                                                  | <ul style="list-style-type: none"> <li>• Satisfaction</li> </ul>                                                                                        |
| Gowda D, <i>et al.</i> <sup>48</sup>                                                     | Post-test | Not stated     | Observation of sessions; interviews                                                                                | <ul style="list-style-type: none"> <li>• Relationship-building</li> <li>• Resilience and burnout detection/mitigation</li> <li>• Empathy</li> </ul>     |
| Holub PG. <sup>51</sup>                                                                  | Post-test | Immediate      | Focus Groups                                                                                                       | <ul style="list-style-type: none"> <li>• Empathy</li> </ul>                                                                                             |
| Kennedy AJ, Sgro G. <sup>54</sup>                                                        | Post-test | Immediate      | Open-ended survey                                                                                                  | <ul style="list-style-type: none"> <li>• Satisfaction</li> </ul>                                                                                        |
| Murinson, B. <sup>60</sup>                                                               | Post-test | Immediate      | Content analysis of responses                                                                                      | <ul style="list-style-type: none"> <li>• Empathy</li> <li>• Ethical inquiry</li> <li>• Perspective-taking/Reflection</li> </ul>                         |
| Polvani S, <i>et al.</i> <sup>61</sup>                                                   | Post-test | Immediate      | Patient and family interviews; video recorded patient-doctor interactions, document review of letters of complaint | <ul style="list-style-type: none"> <li>• Relationship-building</li> </ul>                                                                               |
| Small, <i>et al.</i> <sup>70</sup>                                                       | Post-test | 1.5 year later | Interviews                                                                                                         | <ul style="list-style-type: none"> <li>• Relationship-building</li> <li>• Empathy</li> <li>• Resilience and burnout detection/mitigation</li> </ul>     |
| Spike J. <sup>73</sup>                                                                   | Post-test | Immediate      | Open-ended survey                                                                                                  | <ul style="list-style-type: none"> <li>• Satisfaction</li> </ul>                                                                                        |
| Walker MR, <i>et al.</i> <sup>65</sup>                                                   | Post-test | Immediate      | Open-ended survey                                                                                                  | <ul style="list-style-type: none"> <li>• Satisfaction</li> </ul>                                                                                        |
| Winkel AF, <i>et al.</i> <sup>67</sup>                                                   | Post-test | Immediate      | Questionnaire                                                                                                      | <ul style="list-style-type: none"> <li>• Satisfaction</li> </ul>                                                                                        |
| Wohlmann A, Halstein M. <sup>68</sup>                                                    | Post-test | Immediate      | Open-ended survey                                                                                                  | <ul style="list-style-type: none"> <li>• Satisfaction</li> </ul>                                                                                        |
| Zohouri M. <sup>69</sup>                                                                 | Post-test | Immediate      | Content analysis of essays                                                                                         | <ul style="list-style-type: none"> <li>• Empathy</li> <li>• Relationship-building</li> <li>• Perspective-taking/Reflection</li> </ul>                   |

1  
2  
3  
4  
5  
6  
7  
8  
9  
10  
11  
12  
13  
14  
15  
16  
17  
18  
19  
20  
21  
22  
23  
24  
25  
26  
27  
28  
29  
30  
31  
32  
33  
34  
35  
36  
37  
38  
39  
40  
41  
42  
43  
44  
45  
46  
47  
48  
49  
50  
51  
52  
53  
54  
55  
56  
57  
58  
59  
60

## Content and Outcomes of Narrative Medicine Programs: A Systematic Review of the Literature through 2017

Notes: <sup>a</sup>All Quantitative Evaluations – Well Described report evaluation at the end of the program except for Winkel and Winkel AF.<sup>21,66</sup> <sup>b</sup>See Appendix 2 for Outcomes/Findings.

For peer review only

**Content and Outcomes of Narrative Medicine Programs:  
A Systematic Review of the Literature through 2017**

**Table 3:** Competencies Evaluated in Narrative Medicine Programs in Systematic Review<sup>a</sup>

| <b>Program Evaluation Outcomes</b>                   | <b>Quantitative, Well Described (n=7)</b> | <b>Qualitative, Well Described (n=21)</b> |
|------------------------------------------------------|-------------------------------------------|-------------------------------------------|
| <b>Participant Satisfaction</b>                      | 4                                         | 8                                         |
| <b>Relationship-building</b>                         | 0                                         | 11                                        |
| <b>Empathy</b>                                       | 2                                         | 7                                         |
| <b>Perspective-taking/Reflection</b>                 | 1                                         | 5                                         |
| <b>Resilience &amp; Burnout Detection/Mitigation</b> | 1                                         | 4                                         |
| <b>Confidence/ Personal Accomplishment</b>           | 2                                         | 2                                         |
| <b>Narrative Competence</b>                          | 0                                         | 3                                         |
| <b>Relevance to Work</b>                             | 1                                         | 1                                         |
| <b>Pedagogical Skills</b>                            | 1                                         | 1                                         |
| <b>Ethical Inquiry</b>                               | 0                                         | 2                                         |
| <b>Cultural Competence</b>                           | 0                                         | 1                                         |
| <b>Institutional Impact</b>                          | 0                                         | 1                                         |

Notes: <sup>a</sup> Results of some evaluations were not well described, not mentioned, or not statistically significant. Thus, not all results in Appendix 2 are included in the descriptions of positive NM program outcomes discussed in the text of our review.

# Content and Outcomes of Narrative Medicine Programs: A Systematic Review of the Literature through 2017

## Figure Legend

**Figure 1.** Record Search and Screening Process for Narrative Medicine Systematic Review, through 2017

## PRISMA Checklist

Please see the attached PRISMA checklist.

## Acknowledgements

Not applicable.

## Authors' Contributions

Christy D. Di Frances, PhD, MA, Ellen Childs, PhD, John Carlo Pasco, MS, Ludovic Trinquart, PhD, David B. Flynn, MS(LIS), Sarah L. Wingerter, MD, Robina M. Bhasin, EdM, Lindsay B. Demers, PhD, MS, and Emelia J. Benjamin, MD, ScM have made substantial contributions to the manuscript materials as follows:

1. Engaging in the conceptualization and/or design of the work—or in the acquisition, analysis, and/or interpretation of data.
2. Drafting and/or critically revising the manuscript in regards to significant intellectual content.
3. Giving final approval to the version of the work submitted for publication.
4. Agreeing to be held accountable for all aspects of the work, including ensuring that any inquiries related to the accuracy and/or integrity of the work are appropriately investigated and resolved.

## Competing Interests/COI Disclosures & Funding

The authors have no conflicts of interest in connection with this manuscript. This research was supported by the:

- National Institutes of Health (NIH) and the Food and Drug Administration (FDA) Center for Tobacco Products (CTP) Award Numbers P50HL120163 and U54HL120163
- NIH/NHLBI Award Numbers R01 HL128914, R01 HL092577, and R01 HL126136

1  
2  
3  
4  
5  
6  
7  
8  
9  
10  
11  
12  
13  
14  
15

## Content and Outcomes of Narrative Medicine Programs: A Systematic Review of the Literature through 2017

- American Heart Association (AHA) Award Numbers 18SFRN34110082 and 18SFRN34150007
- Robert Wood Johnson Foundation: ‘Studying mHealth technologies to help people improve their health and share their health information in real time with health care providers’
- Columbia University 2018-2019 Narrative Medicine Fellowship: ‘Peer-led Narrative Medicine Workshops for First and Second Year Medical Students’ (\$2,000 awarded to BU medical student John Carlo Pasco, co-author)

### Data Sharing

16  
17  
18  
19  
20  
21  
22  
23  
24  
25  
26  
27  
28  
29  
30  
31  
32  
33  
34  
35  
36  
37  
38  
39  
40  
41  
42  
43  
44  
45  
46  
47  
48  
49  
50  
51  
52  
53  
54  
55  
56  
57  
58  
59  
60

Not applicable.

### Patient Consent

Not applicable.

### Patient and Public Involvement

Not applicable.

### Ethical Approval

Not applicable.

## Content and Outcomes of Narrative Medicine Programs: A Systematic Review of the Literature through 2017

### References

1. Bouterse J, Karstens B. A Diversity of Divisions: Tracing the History of the Demarcation between the Sciences and the Humanities. *Isis*. 2015;106(2):341-352.
2. Weisz G. The emergence of medical specialization in the nineteenth century. *Bull Hist Med*. 2003;77(3):536-575.
3. Flexner A, Pritchett HS. *Medical education in the United States and Canada; a report to the Carnegie Foundation for the Advancement of Teaching*. New York City 1910.
4. Marchalik D. The Return to Literature-Making Doctors Matter in the New Era of Medicine. *Acad Med*. 2017.
5. Riggs G. Commentary: Are we ready to embrace the rest of the Flexner Report? *Acad Med*. 2010;85(11):1669-1671.
6. Johnston SC. Anticipating and Training the Physician of the Future: The Importance of Caring in an Age of Artificial Intelligence. *Acad Med*. 2018.
7. Bosch G, Casadevall A. Graduate Biomedical Science Education Needs a New Philosophy. *MBio*. 2017;8(6).
8. Jones AH. Why teach literature and medicine? Answers from three decades. *J Med Humanit*. 2013;34(4):415-428.
9. Hunter KM, Charon R, Coulehan JL. The study of literature in medical education. *Acad Med*. 1995;70(9):787-794.
10. Charon R. Narrative medicine: form, function, and ethics. *Ann Intern Med*. 2001;134(1):83-87.
11. Charon R. Narrative Medicine: A Model for Empathy, Reflection, Profession, and Trust. *JAMA*. 2001;286(15):1897-1902.
12. Charon R, Banks JT, Connelly JE, et al. Literature and medicine: contributions to clinical practice. *Ann Intern Med*. 1995;122(8):599-606.
13. Tsai SL, Ho MJ. Can narrative medicine training improve OSCE performance? *Med Educ*. 2012;46(11):1112-1113.
14. DasGupta S. How to Catch the Story but Not Fall Down: Reading Our Way to More Culturally Appropriate Care. *Virtual Mentor*. 2006;8(5):315-318.
15. Deen SR, Mangurian C, Cabaniss DL. Points of contact: using first-person narratives to help foster empathy in psychiatric residents. *Acad Psychiatry*. 2010;34(6):438-441.
16. Chen PJ, Huang CD, Yeh SJ. Impact of a narrative medicine programme on healthcare providers' empathy scores over time. *BMC Med Educ*. 2017;17(1):108.
17. DasGupta S, Charon R. Personal illness narratives: using reflective writing to teach empathy. *Acad Med*. 2004;79(4):351-356.
18. Miller E, Balmer D, Hermann N, Graham G, Charon R. Sounding narrative medicine: studying students' professional identity development at Columbia University College of Physicians and Surgeons. *Acad Med*. 2014;89(2):335-342.
19. Wald HS, Haramati A, Bachner YG, Urkin J. Promoting resiliency for interprofessional faculty and senior medical students: Outcomes of a workshop



## Content and Outcomes of Narrative Medicine Programs: A Systematic Review of the Literature through 2017

- 1  
2  
3  
4 using mind-body medicine and interactive reflective writing. *Med Teach*.  
5 2016;38(5):525-528.  
6  
7 20. Veno M, Silk H, Savageau JA, Sullivan KM. Evaluating One Strategy for  
8 Including Reflection in Medical Education and Practice. *Fam Med*.  
9 2016;48(4):300-304.  
10 21. Winkel AF, Feldman N, Moss H, Jakalow H, Simon J, Blank S. Narrative Medicine  
11 Workshops for Obstetrics and Gynecology Residents and Association With  
12 Burnout Measures. *Obstet Gynecol*. 2016;128 Suppl 1:27s-33s.  
13 22. National Academies of Sciences E, Medicine. *The Integration of the Humanities  
14 and Arts with Sciences, Engineering, and Medicine in Higher Education: Branches  
15 from the Same Tree*. Washington, DC: The National Academies Press; 2018.  
16 23. Barber S, Moreno-Leguizamon CJ. Can narrative medicine education contribute to  
17 the delivery of compassionate care? A review of the literature. *Med Humanit*. 2017.  
18 24. Chen I, Forbes C. Reflective writing and its impact on empathy in medical  
19 education: systematic review. *J Educ Eval Health Prof*. 2014;11:20.  
20 25. Fioretti C, Mazzocco K, Riva S, Oliveri S, Masiero M, Pravettoni G. Research  
21 studies on patients' illness experience using the Narrative Medicine approach: a  
22 systematic review. *BMJ Open*. 2016;6(7):e011220.  
23 26. Goyal RK, Charon R, Lekas HM, et al. 'A local habitation and a name': how  
24 narrative evidence-based medicine transforms the translational research paradigm.  
25 *J Eval Clin Pract*. 2008;14(5):732-741.  
26 27. Cochrane Handbook for Systematic Reviews of Interventions. [http://handbook-5-  
27 1.cochrane.org/](http://handbook-5-1.cochrane.org/) ], 2019.  
28 28. Moher D, Liberati A, Tetzlaff J, Altman DG, Group P. Preferred reporting items  
29 for systematic reviews and meta-analyses: the PRISMA statement. *PLoS Med*.  
30 2009;6(7):e1000097.  
31 29. Arntfield SL, Slesar K, Dickson J, Charon R. Narrative medicine as a means of  
32 training medical students toward residency competencies. *Patient Educ Couns*.  
33 2013;91(3):280-286.  
34 30. Aronson L, Schwalbe W. The art and craft of writing for self-care and narrative  
35 advocacy: A workshop in reflective and public writing. *J Pain Symptom Manage*.  
36 2015;49(2):322.  
37 31. Ball SC. Enhancing medicine subinternship through narrative medicine. *J Gen  
38 Intern Med*. 2011;26:S617.  
39 32. Balmer D, Gill A, Nuila R. Integrating narrative medicine into clinical care. *Med  
40 Educ*. 2016;50(5):581-582.  
41 33. Balmer DF, Richards BF. Faculty development as transformation: lessons learned  
42 from a process-oriented program. *Teach Learn Med*. 2012;24(3):242-247.  
43 34. Bhavaraju VL, Miller S. Faculty development in narrative medicine: using stories  
44 to teach, learn, and thrive. *J Grad Med Educ*. 2014;6(2):355-356.  
45 35. Birigwa SN, Khedagi AM, Katz CJ. Stop, look, listen, then breathe: The impact of  
46 a narrative medicine curriculum on pediatric residents. *Acad Pediatr*.  
47 2017;17(5):e40-e41.  
48  
49  
50  
51  
52  
53  
54  
55  
56  
57  
58  
59  
60

**Content and Outcomes of Narrative Medicine Programs:  
A Systematic Review of the Literature through 2017**

36. Bobb SJ. *Finding meaning and sense-making in hospital nursing teams: The promise of Narrative Medicine*. US, Marquette University 2017.
37. Boudreau JD, Liben S, Fuks A. A faculty development workshop in narrative-based reflective writing. *Perspect Med Educ*. 2012;1(3):143-154.
38. Liben S, Chin K, Boudreau JD, Boillat M, Steinert Y. Assessing a faculty development workshop in narrative medicine. *Med Teach*. 2012;34(12):e813-819.
39. Brigley S, Jasper M. Evaluation of a multidisciplinary faculty to support learning in surgical practice. *J Interprof Care*. 2010;24(4):401-411.
40. Chretien KC, Swenson R, Yoon B, Julian R, Keenan J, Kheirbek R. Storytelling with inpatients. *J Gen Intern Med*. 2014;29(1 (Supplement)):S534-S535.
41. Chretien KC, Swenson R, Yoon B, et al. Tell Me Your Story: A Pilot Narrative Medicine Curriculum During the Medicine Clerkship. *J Gen Intern Med*. 2015;30(7):1025-1028.
42. DasGupta S, Meyer D, Calero-Breckheimer A, Costley AW, Guillen S. Teaching cultural competency through narrative medicine: intersections of classroom and community. *Teach Learn Med*. 2006;18(1):14-17.
43. Elliott D, Schaff P, Woehrle T, Walsh A, Trial J. Narrative Reflection in Family Medicine Clerkship - Cultural Competence in the Third Year Required Clerkships. *MedEdPORTAL*. 2010;6(1153).
44. Schaff P. Donning the White Coat: The Narrative Threads of Professional Development. *J LearnThrough the Arts*. 2006;2(1):21.
45. Goodrich TJ, Irvine CA, Boccher-Lattimore D. Narrative Ethics as Collaboration: A Four-Session Curriculum. *Fam Syst Health*. 2005;23(3):348-357.
46. Gordon E. Echoes of burnout in internal medicine resident narrative essays. *J Gen Intern Med*. 2017;32(2):S171-S172.
47. Goupy F, Abgrall-Barbry G, Aslangul E, et al. Can narrative medicine be an answer to patient physician relationship teaching according to students' demand in medical education curricula? *Presse Med*. 2013;42(1):e1-e8.
48. Gowda D, Balmer D, Khedagi A, et al. Year-long narrative medicine intervention to improve interprofessional practice in three primary care practices. *J Gen Intern Med*. 2017;32(2):S725.
49. Heller EA, Heller FE. Narrative medicine: A practical application for using writing as a clinical intervention with cancer patients, caregivers and the clinicians that care for them. *Psycho-Oncology*. 2016;25:10.
50. Hellerstein DJ. "The City of the Hospital": On Teaching Medical Students to Write. *J Med Humanit*. 2015;36(4):269-289.
51. Holub PG. *The influence of narrative in fostering affective development of medical professionalism in an online class*. US, Nova Southeastern University; 2011.
52. Hurst M, Irvine C. Stories of the end: A narrative medicine curriculum to reframe death and dying. In: *Our changing journey to the end: Reshaping death, dying, and grief in America: New paths of engagement; New venues in the search for dignity and grace, Vols. 1-2*. Santa Barbara, CA, US: Praeger/ABC-CLIO; 2014:85-99.
53. Jacobs ZG, Sgro G. Pittsburgh narratives: A multidisciplinary workshop in narrative medicine. *J Gen Intern Med*. 2017;32(2):S697-S698.

**Content and Outcomes of Narrative Medicine Programs:  
A Systematic Review of the Literature through 2017**

- 1
  - 2
  - 3
  - 4
  - 5
  - 6
  - 7
  - 8
  - 9
  - 10
  - 11
  - 12
  - 13
  - 14
  - 15
  - 16
  - 17
  - 18
  - 19
  - 20
  - 21
  - 22
  - 23
  - 24
  - 25
  - 26
  - 27
  - 28
  - 29
  - 30
  - 31
  - 32
  - 33
  - 34
  - 35
  - 36
  - 37
  - 38
  - 39
  - 40
  - 41
  - 42
  - 43
  - 44
  - 45
  - 46
  - 47
  - 48
  - 49
  - 50
  - 51
  - 52
  - 53
  - 54
  - 55
  - 56
  - 57
  - 58
  - 59
  - 60
54. Kennedy AJ, Sgro G. Birmingham voices: Developing narrative competency to better serve vulnerable populations. *J Gen Intern Med.* 2016;31(2):S806.
55. Kissler MJ, Saxton B, Nuila R, Balmer DF. Professional Formation in the Gross Anatomy Lab and Narrative Medicine: An Exploration. *Acad Med.* 2016;91(6):772-777.
56. Lane-Reticker A, Fogel C. Introducing a humanities focus into a curriculum for midcareer HPM trainees. *J Pain Symptom Manage.* 2012;43(2):446.
57. Machado MC, Lobo Antunes J. Narrativa da Doença: Uma Disciplina Optativa na Faculdade de Medicina de Lisboa. *Acta medica portuguesa.* 2016;29(12):790-792.
58. Mark MSJ, Todd K, Todd D. The language of illness: The art of telling, listening, and self-care through narrative medicine. *J Pain Symptom Manage.* 2017;53(2):321-322.
59. Moss HA, Winkel AF, Jewell A, et al. Narrative medicine: Using reflective writing workshops to help house staff address the complex and challenging nature of caring for gynecologic oncology patients. *Gynecol Oncol.* 2014;133:73.
60. Murinson B. Pain and the humanities: exploring the meaning of pain in medicine through drama, literature, fine arts and philosophy. *MedEdPORTAL.* 2010;6(8129).
61. Polvani S, Mammucari M, Zuppiroli A, et al. Narrative medicine, a model of clinical governance: The experience of the Local Health Authority of Florence in Italy. *Clinical Practice.* 2014;11(5):493-499.
62. Roy R. Teaching Cultural Sensitivity through Literature and Reflective Writing. *Virtual Mentor.* 2007;9(8):543-546.
63. Shankar PR. A voluntary medical humanities module in a medical college in Western Nepal: participant feedback. *Teach Learn Med.* 2009;21(3):248-253.
64. Spike J. 'On Doctoring': Essays on Professionalism. *MedEdPORTAL.* 2008;4(792).
65. Walker MR, Zúñiga D, Triviño X. Narrativa y formación docente: la experiencia de 5 años de un taller de escritura. *Revista Medica de Chile.* 2012;140(5):659-666.
66. Winkel AF. Narrative Medicine: A Writing Workshop Curriculum for Residents. *MedEdPORTAL.* 2016;12(10493).
67. Winkel AF, Hermann N, Graham MJ, Ratan RB. No time to think: making room for reflection in obstetrics and gynecology residency. *J Grad Med Educ.* 2010;2(4):610-615.
68. Wohlmann A, Halstein M. Narrative Medizin: Ein Pilotprojekt im Skills Lab der Universitätsmedizin Mainz. *ZFA (Stuttgart).* 2016;92(11):456-460.
69. Zohouri M, Amini M, Sagheb MM. Fourth year medical students' reflective writing on "Death of Ivan Ilych": a qualitative study. *J Adv Med Educ Prof.* 2017;5(2):73-77.
70. Small LC, Feldman LS, Oldfield BJ. Using Narrative Medicine to Build Community Across the Health Professions and Foster Self-Care. *J Radiol Nurs.* 2017;36(4):224-227.
71. J. S. Patient-Centered Medicine: Writing Your Patient's Life Story. *MedEdPORTAL.* 2008;4(793).
72. Robeson R, King NMP. Performable Case Studies in Ethics Education. *Healthcare (Basel, Switzerland).* 2017;5(3).

**Content and Outcomes of Narrative Medicine Programs:  
A Systematic Review of the Literature through 2017**

73. Spike J. Patient-Centered Medicine: Writing Your Patient's Life Story. *MedEdPORTAL*. 2008;4(793).
74. Kuper A. Literature and medicine: a problem of assessment. *Acad Med*. 2006;81(10 Suppl):S128-137.
75. Doukas DJ, McCullough LB, Wear S, Project to R, Integrate Medical Education I. Perspective: Medical education in medical ethics and humanities as the foundation for developing medical professionalism. *Acad Med*. 2012;87(3):334-341.
76. Steinert Y, McLeod PJ, Liben S, Snell L. Writing for publication in medical education: the benefits of a faculty development workshop and peer writing group. *Med Teach*. 2008;30(8):e280-285.
77. Sonnad SS, Goldsack J, McGowan KL. A writing group for female assistant professors. *J Natl Med Assoc*. 2011;103(9-10):811-815.
78. Brandon C, Jamadar D, Girish G, Dong Q, Morag Y, Mullan P. Peer support of a faculty "writers' circle" increases confidence and productivity in generating scholarship. *Acad Radiol*. 2015;22(4):534-538.
79. Pololi L, Knight S, Dunn K. Facilitating scholarly writing in academic medicine. *J Gen Intern Med*. 2004;19(1):64-68.
80. Dankoski M, Palmer M, Banks J, et al. Academic writing: Supporting faculty in a critical competency for success. *J Fac Dev*. 2012;26(2):47-54.
81. AAMC. Burnout Among U.S. Medical School Faculty. *AAMC Analysis in Brief*. 2019;19(1).
82. Zhang YY, Han WL, Qin W, et al. Extent of compassion satisfaction, compassion fatigue and burnout in nursing: A meta-analysis. *Journal of nursing management*. 2018.
83. Dugani S, Afari H, Hirschhorn LR, et al. Prevalence and factors associated with burnout among frontline primary health care providers in low- and middle-income countries: A systematic review. *Gates Open Res*. 2018;2:4.
84. Shanafelt TD, Hasan O, Dyrbye LN, et al. Changes in Burnout and Satisfaction With Work-Life Balance in Physicians and the General US Working Population Between 2011 and 2014. *Mayo Clin Proc*. 2015;90(12):1600-1613.
85. Tjebkink JK, Vergouwen AC, Smulders YM. Emotional exhaustion and burnout among medical professors; a nationwide survey. *BMC medical education*. 2014;14:183.
86. Ishak W, Nikraves R, Lederer S, Perry R, Ogunyemi D, Bernstein C. Burnout in medical students: a systematic review. *The clinical teacher*. 2013;10(4):242-245.
87. Cunningham T. *The use and role of narrative practices to mitigate compassion fatigue among expatriate health workers during the Ebola outbreak of 2013-2016*. US, Columbia University; 2017.
88. Hunt MR, Schwartz L, Sinding C, Elit L. The ethics of engaged presence: a framework for health professionals in humanitarian assistance and development work. *Dev World Bioeth*. 2014;14(1):47-55.
89. Johnson DR. Transportation into a story increases empathy, prosocial behavior, and perceptual bias toward fearful expressions. *Pers Individ Dif*. 2012;52(2):150-155.

**Content and Outcomes of Narrative Medicine Programs:  
A Systematic Review of the Literature through 2017**

- 1  
2  
3  
4  
5  
6  
7  
8  
9  
10  
11  
12  
13  
14  
15  
16  
17  
18  
19  
20  
21  
22  
23  
24  
25  
26  
27  
28  
29  
30  
31  
32  
33  
34  
35  
36  
37  
38  
39  
40  
41  
42  
43  
44  
45  
46  
47  
48  
49  
50  
51  
52  
53  
54  
55  
56  
57  
58  
59  
60
90. Pasco JC, Anderson C, DasGupta S. Visionary medicine: speculative fiction, racial justice and Octavia Butler's 'Bloodchild'. *Med Humanit.* 2016;42(4):246-251.
91. Saffran L. What Pauline Doesn't Know: Using Guided Fiction Writing to Educate Health Professionals about Cultural Competence. *J Med Humanit.* 2017.
92. Barbour RS. Mixing qualitative methods: quality assurance or qualitative quagmire? *Qual Health Res.* 1998;8(3):352-361.

For peer review only

**Figure 1.** Record Search and Screening Process for Narrative Medicine Systematic Review, through 2017 [Mono Image]



**Supplemental Digital Appendix 1.** Literature Database Search for Narrative Medicine Systematic Review, through 2017

| Database           | Search Terms                                                                   | Results | Duplicates | Original Citations |
|--------------------|--------------------------------------------------------------------------------|---------|------------|--------------------|
| <b>PubMed</b>      | “narrative medicine”[all fields] OR<br>“reflective writing”[all fields]        | 456     | 4          | 452                |
| <b>Embase</b>      | “narrative medicine”/exp OR<br>“narrative medicine” OR<br>“reflective writing” | 593     | 321        | 272                |
| <b>PsycINFO</b>    | TX narrative medicine OR TX<br>reflective writing                              | 497     | 107        | 390                |
| <b>ERIC</b>        | “narrative medicine”                                                           | 13      | 6          | 7                  |
| <b>MedEdPORTAL</b> | “narrative”                                                                    | 98      | 1          | 97                 |
| <b>MedEdPORTAL</b> | “reflective”                                                                   | 55      | 9          | 46                 |
| <b>TOTAL</b>       |                                                                                | 1,712   | 448        | <b>1,264</b>       |

**Supplemental Digital Appendix 2. Outcomes/Findings for Qualitative – Well Described Evaluations (a Supplemental to Table 2B)**

| Reference                                                            | Outcomes/Findings                                                                                                                                                                                                                                                                                                                                                                                                                                                                                                                                                    | Outcome Improved – Thematic Grouping                                                                                                                                             |
|----------------------------------------------------------------------|----------------------------------------------------------------------------------------------------------------------------------------------------------------------------------------------------------------------------------------------------------------------------------------------------------------------------------------------------------------------------------------------------------------------------------------------------------------------------------------------------------------------------------------------------------------------|----------------------------------------------------------------------------------------------------------------------------------------------------------------------------------|
| Arntfield SL, <i>et al.</i> (1)                                      | Confidence in effectiveness of future as physicians                                                                                                                                                                                                                                                                                                                                                                                                                                                                                                                  | <ul style="list-style-type: none"> <li>• Confidence/ Personal Accomplishment</li> <li>• Relevance to work</li> </ul>                                                             |
| Balmer DF, Richards BF.(2)                                           | Qualitative themes that emerged: 1) Teaching skills and personal growth; 2) Impact on Interpersonal relationships; 3) impact on the institution                                                                                                                                                                                                                                                                                                                                                                                                                      | <ul style="list-style-type: none"> <li>• Institutional impact</li> <li>• Pedagogical Skills</li> <li>• Relationship-building</li> <li>• Perspective-taking/Reflection</li> </ul> |
| Birigwa SN, <i>et al.</i> (3)                                        | “...NM workshops help with coping with stress, give time to relax and self-reflect, and increase positive physician/patient engagement.”                                                                                                                                                                                                                                                                                                                                                                                                                             | <ul style="list-style-type: none"> <li>• Relationship-building</li> <li>• Resilience and burnout detection/mitigation</li> <li>• Perspective-taking/Reflection</li> </ul>        |
| Bobb SJ(4)                                                           | “...Building stronger relationships as they grew more aware of each other’s stories and had the opportunity to reflect on their work among their coworkers.... intensified individual and team understanding of their roles as healthcare professionals...this process positively contributed to their individual and shared identity, value, and meaning as a nurse.”                                                                                                                                                                                               | <ul style="list-style-type: none"> <li>• Perspective-taking/Reflection</li> <li>• Relationship-building</li> <li>• Confidence/Personal accomplishment</li> </ul>                 |
| Boudreau JD, <i>et al.</i> (5)<br>AND Liben S, <i>et al.</i> (6)     | “The written comments were invariably supportive... The most prevalent specific recommendations revolved around ensuring that in future workshops everyone should be accorded the opportunity to share stories... A second cluster of recommendations had to do with the quality of the writing triggers”<br>“...the majority of study participants already use a form of narrative in their teaching ... those who attended displayed a more nuanced understanding of narrative as revealed by their (appropriate) use of specific narrative medicine descriptors.” | <ul style="list-style-type: none"> <li>• Narrative competence</li> <li>• Satisfaction</li> </ul>                                                                                 |
| Brigley S, Jasper M(7)                                               | “...improved educational understanding and multidisciplinary awareness among its participants. Refinements of the programme were identified...”                                                                                                                                                                                                                                                                                                                                                                                                                      | <ul style="list-style-type: none"> <li>• Relationship-building</li> <li>• Perspective-taking/Reflection</li> </ul>                                                               |
| Chretien KC, <i>et al.</i> (8)<br>AND Chretien KC, <i>et al.</i> (9) | Qualitative analysis resulted in four themes: patient experience, student experience (and student learning), student-patient dynamic, and challenges.<br>‘Students' stories showed attainment of narrative competence.’                                                                                                                                                                                                                                                                                                                                              | <ul style="list-style-type: none"> <li>• Narrative competence,</li> <li>• Relationship-building,</li> <li>• Satisfaction</li> </ul>                                              |
| DasGupta S, <i>et al.</i> (10)<br>AND DasGupta S.(11)                | “...all participants believed the activity helped them learn about the importance of recognizing cultural differences.” “...the medical residents reported a variety of intentions to change their attitudes and behaviors including an intention to be more sensitive to cultural differences and more patient and to recognize their biases and the effect of those biases on caregiving.”                                                                                                                                                                         | <ul style="list-style-type: none"> <li>• Cultural competence</li> <li>• Relationship-building</li> <li>• Empathy</li> </ul>                                                      |
| Goodrich TJ, <i>et al.</i> (12)                                      | Findings from the Focus Groups: 1) relevance of narratives in ethical decision making, 2) empathic connection that was achieved through narrative understanding as necessary for producing ethical behavior, 3) ways to nurture insights regarding contextualizing their patients. Findings from the program evaluations: 1) More holistic way of looking at patients (beyond just the illness), 2) recognition of how physicians' values enter into clinical decision making                                                                                        | <ul style="list-style-type: none"> <li>• Empathy</li> <li>• Ethical inquiry</li> <li>• Narrative competence</li> <li>• Relationship-building</li> </ul>                          |



| Reference                     | Outcomes/Findings                                                                                                                                                                                                                                                                                                                                                                                                                                             | Outcome Improved – Thematic Grouping                                                |
|-------------------------------|---------------------------------------------------------------------------------------------------------------------------------------------------------------------------------------------------------------------------------------------------------------------------------------------------------------------------------------------------------------------------------------------------------------------------------------------------------------|-------------------------------------------------------------------------------------|
| Gordon E.(13)                 | "Of [the 39 essays analyzed], 13 (33%) contained statements concerning for burnout." The authors conclude that, "Narrative medicine can be a powerful tool for identifying signs of burnout among Internal Medicine residents. In addition, sharing of patient stories in groups can help trainees to reflect the commonality of challenging patient experiences, which might mitigate feelings of burnout."                                                  | • Resilience and burnout detection/mitigation                                       |
| Goupy F, <i>et al.</i> (14)   | Satisfaction with program                                                                                                                                                                                                                                                                                                                                                                                                                                     | • Satisfaction                                                                      |
| Gowda D, <i>et al.</i> (15)   | "... team members across the disciplines and levels of educational attainment are open to active participation in sessions... team members speak of strengthening attention, valuing creativity, and enhancing relationships."                                                                                                                                                                                                                                | • Relationship-building<br>• Resilience and burnout detection/mitigation<br>Empathy |
| Holub PG.(16)                 | Confirmed quantitative findings that participants' rates of empathy was greater than non-participants.                                                                                                                                                                                                                                                                                                                                                        | Empathy                                                                             |
| Kennedy AJ, Sgro G. (17)      | Satisfaction with program; suggestions for improvement                                                                                                                                                                                                                                                                                                                                                                                                        | Satisfaction                                                                        |
| Murinson, B.(18)              | "Qualitative analysis revealed that: emotional suffering, (e.g., isolation, heartache, etc.) is nearly universal for students at this stage, while physical pain is not; distinguishing physical pain from psychological or social suffering was initially difficult for some students, but the majority improved in this capacity; and that students were challenged to define their own values which served to enhance awareness of other's value systems." | • Empathy<br>• Ethical inquiry<br>Perspective-taking/Reflection                     |
| Polvani S, <i>et al.</i> (19) | Doctor-patient Relationships                                                                                                                                                                                                                                                                                                                                                                                                                                  | • Relationship-building                                                             |
| Small, <i>et al.</i> (20)     | "...narrative medicine can play a role in building community among diverse health care providers and promoting self-care."                                                                                                                                                                                                                                                                                                                                    | • Relationship-building<br>• Empathy<br>Resilience and burnout detection/mitigation |
| Spike J.(21)                  | Satisfaction with program components                                                                                                                                                                                                                                                                                                                                                                                                                          | • Satisfaction                                                                      |
| Walker MR, <i>et al.</i> (22) | Satisfaction and organization of program; the climate, content and leadership of the teachers was the most valued aspects of the program. The number of sessions and activities was reported as insufficient. Participants offered suggestions for improving the program.                                                                                                                                                                                     | • Satisfaction                                                                      |
| Winkel AF, <i>et al.</i> (23) | Satisfaction with program. Residents found it enjoyable, felt more calm/clear headed and satisfied with their daily work. One resident said the writing was difficult. Described reasons for non-attendance.                                                                                                                                                                                                                                                  | • Satisfaction                                                                      |
| Wohlmann A, Halstein M.(24)   | Satisfaction; program helped to understand the patients as humans and that interpretation is important to interaction                                                                                                                                                                                                                                                                                                                                         | • Satisfaction                                                                      |
| Zohouri M.(25)                | "... Three major categories in students' reflection on reading Death of Ivan Ilych as an end of life human body... 1) Emotional experience, 2) Empathy and effective communication, 3) Spirituality and dignity...this reflection activity may help medical students have a deeper idea of the end of life situation and feelings."                                                                                                                           | • Empathy<br>• Relationship-building<br>Perspective-taking/Reflection               |

## Supplemental Digital Appendix 3. Records included in Narrative Medicine Systematic Review

| Authors                      | Publication Year | Publication Type | Program Location      | Number of Participants | Participant Constituency             | Program Goals                                                                                                                                                                                 | Number of Sessions | Hours in Program | Program Activities                                                                                                                                                                                                                                                | Program Evaluation                 |
|------------------------------|------------------|------------------|-----------------------|------------------------|--------------------------------------|-----------------------------------------------------------------------------------------------------------------------------------------------------------------------------------------------|--------------------|------------------|-------------------------------------------------------------------------------------------------------------------------------------------------------------------------------------------------------------------------------------------------------------------|------------------------------------|
| Arntfield, <i>et al.</i> (1) | 2013             | Article          | New York, NY, USA     | 12                     | Medical students                     | To explore the influence of NM training on fourth-year medical students' clinical skills, including communication, collaboration, and professionalism.                                        | 4                  | 10               | Faculty facilitators used readings as a basis for discussion about illness and patient care, and to introduce reflective writing exercises. Participants responded to writing prompts and shared their narratives with the group.                                 | Qualitative – Well Described       |
| Aronson L, Schwabbe W.(26)   | 2015             | Abstract         | Philadelphia, PA, USA | N/S                    | N/S                                  | To foster writing for wellness, advocacy, or education and to facilitate the publication of writing by healthcare professionals                                                               | 1                  | N/S              | A discussion of different modes of writing by healthcare professionals and the varied purposes of such writing. Publication strategies and venues were discussed. Participants wrote in class and received peer feedback from colleagues in a small group format. | None/Not Specified                 |
| Ball SC(27)                  | 2011             | Abstract         | New York, NY, USA     | N/S                    | Medical students                     | To support medicine sub interns through training in reflective writing and narrative competence                                                                                               | N/S                | N/S              | Reflected on sub internship experience, read and discussed texts, offered their perspectives on writing content and style, responded to a writing prompt, and shared their narratives.                                                                            | None/Not Specified                 |
| Balmer, <i>et al.</i> (28)   | 2016             | Abstract         | Houston, TX, USA      | 8                      | Medical students, residents, faculty | To assess the feasibility of integrating NM training into clinical rotations                                                                                                                  | 12                 | 60               | Engaged in literary analysis, small group discussions, and writing workshops. They also submitted a piece of writing for workshopping.                                                                                                                            | Qualitative—Incomplete Description |
| Balmer DF, Richards BF(2)    | 2012             | Article          | New York, NY, USA     | 25                     | Faculty                              | To implement a faculty development program that employed foundational tenants of NM (reading and reflection) as a means towards fostering behavioral and social sciences in medical education | N/S                | N/S              | Read and discussed published narratives to enhance their teaching competencies. They also generated reflective writing for the purpose of telling stories about themselves, their students, and their patients.                                                   | Qualitative – Well Described       |

| Authors                                                  | Publication Year | Publication Type | Program Location   | Number of Participants | Participant Constituency                | Program Goals                                                                                                                                   | Number of Sessions | Hours in Program | Program Activities                                                                                                                                                                                                                             | Program Evaluation                                                  |
|----------------------------------------------------------|------------------|------------------|--------------------|------------------------|-----------------------------------------|-------------------------------------------------------------------------------------------------------------------------------------------------|--------------------|------------------|------------------------------------------------------------------------------------------------------------------------------------------------------------------------------------------------------------------------------------------------|---------------------------------------------------------------------|
| Bhavaraju VL, Miller S(29)                               | 2014             | Article          | Phoenix, AZ, USA   | 12                     | Faculty                                 | To guide residents in using reflective writing to process emotions, reactions, and motivations related to their professional lives              | 12                 | 24               | Opening writing prompt, discussion of doctor-patient related themes in literary pre-readings, and sharing of personal narratives.                                                                                                              | Quantitative – Well Described                                       |
| Birigwa, <i>et al.</i> (3)                               | 2017             | Abstract         | New York, NY, USA  | 16                     | Residents                               | To employ NM for the promotion of wellbeing, self-care, mindfulness, and empathy in pediatric residents                                         | 4                  | 4                | Discussion of literature, reflective writing, art, and spirituality. Motifs explored included: self-care, narrative humility, illness, death, and giving bad news.                                                                             | Qualitative – Well Described                                        |
| Bobb SJ(4)                                               | 2017             | Thesis           | Milwaukee, WI, USA | 11                     | Nurses                                  | To assess the impact of NM practices on the teamwork and professional identity of NICU nurses                                                   | 3                  | N/S              | Read and discussed a narrative, followed by free-writing time based on a prompt, and sharing. Group narrative sessions were followed by semi-structured, one-on-one interviews. Finally, participants were observed while working in the NICU. | Qualitative – Well Described                                        |
| Boudreau, <i>et al.</i> (5) AND Liben, <i>et al.</i> (6) | 2012             | Articles         | Montreal, Canada   | ~ 92                   | Faculty                                 | To introduce narrative theory, practice reflective writing, and discuss strategies for integrating reflective exercises into an apprenticeship. | 1                  | 3                | Workshops included a didactic component as well as literary and writing exercises to develop skills in narrative and reflection.                                                                                                               | Quantitative – Incomplete Description, Qualitative – Well Described |
| Brigley S, Jasper M(7)                                   | 2010             | Article          | Cardiff, Wales, UK | 22                     | Faculty, trainees, administrators/staff | To develop a highly functioning, multidisciplinary faculty of practitioners in surgery operating theaters                                       | 6                  | 36               | Involved reading, reflective writing and portfolio-building for professional development in surgery faculty, trainees, and staff.                                                                                                              | Qualitative – Well Described                                        |

| Authors                                     | Publication Year | Publication Type     | Program Location     | Number of Participants | Participant Constituency                             | Program Goals                                                                                                                                                                                                                                                              | Number of Sessions | Hours in Program | Program Activities                                                                                                                                                                                                                                                                                                                        | Program Evaluation                                                         |
|---------------------------------------------|------------------|----------------------|----------------------|------------------------|------------------------------------------------------|----------------------------------------------------------------------------------------------------------------------------------------------------------------------------------------------------------------------------------------------------------------------------|--------------------|------------------|-------------------------------------------------------------------------------------------------------------------------------------------------------------------------------------------------------------------------------------------------------------------------------------------------------------------------------------------|----------------------------------------------------------------------------|
| Chretien KC, <i>et al.</i> (8, 9)           | 2014, 2015       | Abstract & Article   | Washington D.C., USA | 47                     | Medical students                                     | To develop narrative competence, foster attentive listening, and promote reflection with the broader goal of empathy-formation for better patient care and improved outcomes                                                                                               | 3                  | N/S              | Introduced NM concepts, including a paired storytelling and listening exercise; students attentively listen to and record patient narratives of illness, and to read these back to the patients. Students also worked with patients to choose artwork to effectively represented their story; wrote reflectively about their experiences. | Qualitative – Well Described                                               |
| DasGupta(11) & DasGupta, <i>et al.</i> (10) | 2006             | 2 Articles           | New York, NY, USA    | ~20                    | Resident, faculty, para-medical workers, other staff | To foster cultural competence and effective, empathic communication through a literary case study, with the aim of improving patient care                                                                                                                                  | 13                 | N/S              | Sessions opened with questions about the text and conversation to discuss themes relevant to the novel, including intercultural communication, healthcare practices, and relating to chronically ill and/or dying patients.                                                                                                               | Qualitative – Well Described                                               |
| Elliott <i>et al.</i> (30) & Schaff P(31)   | 2006 & 2010      | Article & Curriculum | Los Angeles, CA, USA | N/S                    | Medical students                                     | To explore clinical skills that foster empathy and recognize the significance of narrative in relation to patients' stories, reflective writing, and appreciating vulnerability. To apply narrative competence and reflective practice skills to the clerkship experience. | 1                  | 2                | Storytelling, followed by 30 minutes of discussion about the literary pre-readings, then reflective writing followed by time for sharing their narratives. Assignments included online weekly journal entries and a narrative project for the final session.                                                                              | Quantitative – Incomplete Description, Qualitative— Incomplete Description |

| Authors                      | Publication Year | Publication Type | Program Location                     | Number of Participants | Participant Constituency          | Program Goals                                                                                                                                                                                                                                                  | Number of Sessions | Hours in Program | Program Activities                                                                                                                                                                                                                                                                                                                                                                                                                                                 | Program Evaluation                                                     |
|------------------------------|------------------|------------------|--------------------------------------|------------------------|-----------------------------------|----------------------------------------------------------------------------------------------------------------------------------------------------------------------------------------------------------------------------------------------------------------|--------------------|------------------|--------------------------------------------------------------------------------------------------------------------------------------------------------------------------------------------------------------------------------------------------------------------------------------------------------------------------------------------------------------------------------------------------------------------------------------------------------------------|------------------------------------------------------------------------|
| Goodrich, <i>et al.</i> (12) | 2005             | Article          | New York, NY, USA & Houston, TX, USA | 48                     | Residents                         | To foster comprehension of and appreciation for the narrative basis of medicine, the ethical dimension of medical encounters, the intersection between social context and clinical decision-making, and the employment of narrative to inform decision making. | 4                  | 16               | The sessions included: demonstration of the narrative aspect of clinical encounters, demonstrated the application of narrative analysis principles to medical narratives; presentations about patients and the medical chart as a form of written reflection, time to practice writing narratives; analyzed stories written by participants; demonstrated the significance of ethics and values as conveyed by narrative, discussed their learning in the program. | Quantitative – Well Described,<br>Qualitative – Well Described         |
| Gordon E(13)                 | 2017             | Abstract         | Newark, NJ, USA                      | 43                     | Residents                         | To identify and alleviate burnout and to foster resilience.                                                                                                                                                                                                    | 1                  | N/S              | Reading a NM piece, submitting writings about meaningful patient encounters.                                                                                                                                                                                                                                                                                                                                                                                       | Qualitative – Well Described                                           |
| Goupy, <i>et al.</i> (14)    | 2013             | Article          | Paris, France                        | 41                     | Medical students                  | To teach narrative and emphasize the significance of listening and writing to better observe/interpret patients' stories and improve the doctor-patient relationship.                                                                                          | 6                  | 20               | Included sessions on: definition of NM and ice breakers for group formation, viewing a film and related discussion, a narrative writing exercise focused on participants' stories of personal or family illness, the theme of empathy in the doctor-patient relationship, the connection between art and medicine, and an overarching discussion about uses of NM.                                                                                                 | Quantitative – Well Described,<br>Qualitative – Well Described         |
| Gowda, <i>et al.</i> (15)    | 2017             | Abstract         | New York, NY, USA                    | ~65                    | Residents, faculty, nurses, staff | To utilize NM in clinical settings for enhancing interprofessional education and practice while reducing burnout                                                                                                                                               | 40                 | 20               | Discussion of published narratives, reflective writing exercises, and peer sharing of written pieces.                                                                                                                                                                                                                                                                                                                                                              | Quantitative – Incomplete Description,<br>Qualitative – Well Described |

| Authors                  | Publication Year | Publication Type | Program Location         | Number of Participants | Participant Constituency                                      | Program Goals                                                                                                                                                                            | Number of Sessions | Hours in Program | Program Activities                                                                                                                                                                                                                                                                                         | Program Evaluation                                             |
|--------------------------|------------------|------------------|--------------------------|------------------------|---------------------------------------------------------------|------------------------------------------------------------------------------------------------------------------------------------------------------------------------------------------|--------------------|------------------|------------------------------------------------------------------------------------------------------------------------------------------------------------------------------------------------------------------------------------------------------------------------------------------------------------|----------------------------------------------------------------|
| Heller EA, Heller FE(32) | 2016             | Abstract         | New York, NY, USA        | N/S                    | Care-givers, staff, patients                                  | To support patients and improve communication and understanding among patients, staff, and caregivers                                                                                    | N/S                | N/S              | Literature and writing are employed to foster discussion. Patients write their stories as a means of gaining a sense of autonomy over their medical trajectories. The workshop creates a trust-based community, fostering communication among caregivers, staff, and patients coping with chronic illness. | None/Not Specified                                             |
| Hellerstein DJ(33)       | 2015             | Article          | New York, NY, USA        | ~192                   | Medical students                                              | To train more effective doctors by helping preclinical medical students to engage with humanities education                                                                              | 6                  | 18               | Close readings and discussion of literary narratives and in-class writing assignments. Participant writings are peer-edited and re-written before submission.                                                                                                                                              | None/Not Specified                                             |
| Holub PG(16)             | 2011             | Thesis           | Fort Lauderdale, FL, USA | 44                     | Students (doctoral-level health sciences)                     | To assess affective development of medical professionalism through online NM programming                                                                                                 | 12                 | 12               | Compared 2 programs on medical ethics and professionalism. Control involved used traditional, problem-based learning activities. Treatment involved relevant literary and multimedia narratives to supplement the text-based case studies.                                                                 | Quantitative – Well Described,<br>Qualitative – Well Described |
| Hurst M, Irvine C(34)    | 2014             | Book chapter     | New York, NY, USA        | 15-18                  | Students in NM master's program (including medical providers) | To positively alter attitudes about death, dying, and end-of-life-care by facilitating interdisciplinary discourse (e.g. among healthcare professionals, writers, philosophers, artists) | N/S                | N/S              | Discussions based on literature and film. Participants practice preparing and teaching NM lessons like what they might use in future medical education. The final assignment is a genre or media analysis focused on storytelling to understand death and dying.                                           | None/Not Specified                                             |

| Authors                       | Publication Year | Publication Type | Program Location    | Number of Participants | Participant Constituency             | Program Goals                                                                                                                                                          | Number of Sessions | Hours in Program | Program Activities                                                                                                                                                                                                                                                                                                                               | Program Evaluation                    |
|-------------------------------|------------------|------------------|---------------------|------------------------|--------------------------------------|------------------------------------------------------------------------------------------------------------------------------------------------------------------------|--------------------|------------------|--------------------------------------------------------------------------------------------------------------------------------------------------------------------------------------------------------------------------------------------------------------------------------------------------------------------------------------------------|---------------------------------------|
| Jacobs ZG(35)                 | 2017             | Abstract         | Pittsburgh, PA, USA | N/S                    | Medical students, residents, faculty | To develop a sustainable, collaborative NM workshop for fostering narrative competence and empathy, as well as for promoting well being among healthcare professionals | 8                  | 8                | Explored medically-related themes by cultivating narrative competence, with a focus on literary close reading/textual analysis; reflective writing/storytelling; and interpreting art, film, and photography. Participants had the opportunity to engage in an online forum, where literary excerpts and reflective writing prompts were posted. | Quantitative – Incomplete Description |
| Kennedy AJ, Sgro G(17)        | 2016             | Abstract         | Pittsburgh, PA, USA | 7                      | Medical students, residents, faculty | To use creative nonfiction to help residents consider other perspectives, thus providing enhanced care for patients from underserved populations                       | 4                  | N/S              | Completed pre-readings and interviewing one of their patients at a clinic for underserved populations; they later wrote about patients. Workshops focused on narrative themes. Sessions included discussions of the pre-readings and writing to prompts, and the opportunity for participants to read their stories and receive peer feedback.   | Qualitative – Satisfaction Only       |
| Kissler, et al.(36)           | 2016             | Article          | Houston, TX, USA    | 17                     | Medical students                     | To explore how medical students' narrative reflections about their experiences in the anatomy lab might display themes relevant to professional identity formation     | 1                  | 1                | Read two narratives and then wrote to related prompts. Writing time was followed by a group exercise in which students had the opportunity to read their narratives and engage in discussion with peers.                                                                                                                                         | None/Not Specified                    |
| Lane-Reticke r A, Fogel C(37) | 2012             | Abstract         | Hartford, CT, USA   | 5                      | Physicians                           | To discuss the significance of the humanities in career development in Hospice and Palliative Medicine and overall physician wellness                                  | N/S                | N/S              | Read poetry and (sometimes) perspectives pieces from medical journals, and engaged in reflective writing. By turns, participants facilitate the discussion. Also went to a local art museum and watched a film with an end-of-life theme.                                                                                                        | None/Not Specified                    |

| Authors                        | Publication Year | Publication Type | Program Location   | Number of Participants | Participant Constituency                                      | Program Goals                                                                                                                                                                                                          | Number of Sessions | Hours in Program | Program Activities                                                                                                                                                                                                                                             | Program Evaluation                                                  |
|--------------------------------|------------------|------------------|--------------------|------------------------|---------------------------------------------------------------|------------------------------------------------------------------------------------------------------------------------------------------------------------------------------------------------------------------------|--------------------|------------------|----------------------------------------------------------------------------------------------------------------------------------------------------------------------------------------------------------------------------------------------------------------|---------------------------------------------------------------------|
| Machado MC, Lobo Antunes J(38) | 2016             | Article          | Lisbon, Portugal   | 12                     | Medical students                                              | To develop narrative competence, learn communication strategies, interpret and understand illness narratives, and cultivate reflective practice                                                                        | N/S                | 23+              | Reading literary texts, reflective dialogue, and reflective writing were employed during the theoretical component to facilitate discussion of various themes.                                                                                                 | None/Not Specified                                                  |
| Mark, <i>et al.</i> (39)       | 2017             | Abstract         | Phoenix, AZ, USA   | N/S                    | Nurses                                                        | To define and explain the theory and practice of NM, and to demonstrate how NM skills can help increase empathy and understanding for better patient care                                                              | 1                  | 1                | The program introduced NM theory, methods, applications, and tools to promote trainee self-care, with a particular focus on secondary trauma.                                                                                                                  | None/Not Specified                                                  |
| Moss, <i>et al.</i> (40)       | 2014             | Abstract         | New York, NY, USA  | 27                     | Resident fellows                                              | Created and implemented an NM program to reduce burnout and increase empathy and perceptions of service culture                                                                                                        | 4                  | N/S              | NM workshops were introduced into protected, didactic time slots. Sessions employed literature (poetry and short stories) and made time for reflective writing and group discussion to explore themes and issues.                                              | Quantitative – Well Described                                       |
| Murinson B(18)                 | 2010             | Curriculum       | Baltimore, MD, USA | N/S                    | Medical students                                              | To approach pain and suffering through the lens of the humanities as a means of encouraging emotional growth, developing empathy, and fostering professional value formation regarding the ethics of dealing with pain | 4                  | 8                | Encouraged participants to reflect and discuss experiences of and responses to pain to foster emotional growth and develop empathy.                                                                                                                            | Quantitative – Incomplete Description, Qualitative – Well Described |
| Polvani, <i>et al.</i> (19)    | 2014             | Article          | Florence, Italy    | 70                     | Physicians, nurses, paramedical workers, administrators/staff | To enhance NM awareness among health professionals as a means of improving quality of care                                                                                                                             | N/S                | N/S              | Interviewed patients about their illness to identify critical issues. Used focus groups, theater, poems, and video recorded conversations to assess both verbal and nonverbal communication to improve doctor-patient relationships and explore communication. | Qualitative – Well Described                                        |



| Authors                 | Publication Year | Publication Type | Program Location                 | Number of Participants | Participant Constituency                                                                                         | Program Goals                                                                                                        | Number of Sessions | Hours in Program | Program Activities                                                                                                                                                                                  | Program Evaluation                                                     |
|-------------------------|------------------|------------------|----------------------------------|------------------------|------------------------------------------------------------------------------------------------------------------|----------------------------------------------------------------------------------------------------------------------|--------------------|------------------|-----------------------------------------------------------------------------------------------------------------------------------------------------------------------------------------------------|------------------------------------------------------------------------|
| Robeson R, King NMP(41) | 2017             | Article          | Chapel Hill/Wake Forest, NC, USA | N/S                    | Medical students, graduate bioethics students (including health professionals)                                   | To cultivate reflection and discussion related to bioethics.                                                         | N/S                | N/S              | Course sessions can be subdivided into three phases: discussion and analysis, research, and writing of the performable case studies (PCS).                                                          | None/Not Specified                                                     |
| Roy R(42)               | 2007             | Article          | Chicago, IL, USA                 | N/S                    | Medical students                                                                                                 | To use literature and reflective writing as a means of teaching cultural competence, communication, and sensitivity  | 4                  | N/S              | As pre-work, participants reviewed reflective readings based on session themes and wrote short reflective narratives. In-class time included literary analysis, discussion, and reflective writing. | Qualitative—Incomplete Description                                     |
| Shankar PR(43)          | 2009             | Article          | Pokhara, Nepal                   | 26                     | Medical students, faculty                                                                                        | To promote the advantages of the medical humanities for medical students and physicians                              | 13                 | N/S              | Small-group sessions included literary and art analysis, reflective writing, group discussion, role play, case studies, and debates for exploring medical humanities.                               | Qualitative—Incomplete Description                                     |
| Small LC, et al.(20)    | 2017             | Article          | Baltimore, MD, USA               | 126                    | Medical students, resident, fellows, faculty, nurses, nursing students, paramedical worker, administrators/staff | To foster empathy, reflective practice, and interdisciplinary community-building among clinicians and hospital staff | 18                 | N/S              | Each session included discussion of literary readings, reflective writing based on a prompt, and sharing of participant writings.                                                                   | Qualitative – Well Described                                           |
| Spike J(21)             | 2008             | Curriculum       | Houston TX, USA                  | N/S                    | Medical students                                                                                                 | To employ narrative to discuss professionalism, problem solving, and work-life balance                               | 1                  | 3                | Pre-readings were assigned well in advance and facilitators led small-group sessions (<10 students). The session also allowed time for a short reflective writing exercise.                         | Quantitative – Incomplete Description, Qualitative – Satisfaction Only |

| Authors                                  | Publication Year | Publication Type     | Program Location                                              | Number of Participants | Participant Constituency | Program Goals                                                                                                                                                | Number of Sessions | Hours in Program | Program Activities                                                                                                                                                                                                                                                                                                                             | Program Evaluation                                                        |
|------------------------------------------|------------------|----------------------|---------------------------------------------------------------|------------------------|--------------------------|--------------------------------------------------------------------------------------------------------------------------------------------------------------|--------------------|------------------|------------------------------------------------------------------------------------------------------------------------------------------------------------------------------------------------------------------------------------------------------------------------------------------------------------------------------------------------|---------------------------------------------------------------------------|
| Walker, <i>et al.</i> (22)               | 2012             | Article              | Santiago, Chile                                               | 36                     | Faculty                  | To experiment with literary texts and writing techniques in medical education as a means of awakening creativity and facilitating reflection                 | 6                  | 12               | Sessions included reading and reflecting on literary texts, writing, sharing, and discussing participants' narratives. At the end of the course, each participant presented a narrative to be evaluated by peers and teachers according to: theme, character(s), context, development (conflict and/or transformation), and writing technique. | Quantitative – Well Described,<br>Qualitative – Satisfaction Only         |
| Winkel (44) & Winkel, <i>et al.</i> (45) | 2016             | Article & Curriculum | New York City, NY, USA; Chicago, IL, USA; Burlington, VT, USA | 66 [43 evaluated]      | Residents                | To determine if an NM curriculum can reduce burnout. To train residents in reflecting on and processing their own and their patients' experiences            | 15                 | 15               | Used literary narratives to foster discussion focused on relevant themes. Reflective writing prompts and time for sharing participant narratives were also integrated into the curriculum.                                                                                                                                                     | Quantitative – Well Described                                             |
| Winkel AF, <i>et al.</i> (23)            | 2010             | Article              | New York City, NY, USA                                        | 20                     | Residents                | To reduce burnout and enhance empathy through NM and reflection                                                                                              | 6                  | 6                | Sessions opened with reading and discussing fiction. Writing prompts were used to generate narratives in class. Participants were encouraged to read their writings to the group and invite feedback in an atmosphere of confidentiality.                                                                                                      | Quantitative – Incomplete Description,<br>Qualitative – Satisfaction Only |
| Wohlmann A, Halstein M(24)               | 2016             | Article              | Mainz, Germany                                                | 9                      | Medical students         | To use texts and art for fostering observational skills, developing an understanding of complex illness narratives, and appreciating diverse interpretations | 6                  | 7.5              | Participants engaged in close reading short stories, poems, and novels with medical motifs. Discussion included analysis of effective literary techniques and meaning. Participants engaged reflective writing and subsequent peer workshopping.                                                                                               | Quantitative – Incomplete Description,<br>Qualitative – Satisfaction Only |

| Authors                     | Publication Year | Publication Type | Program Location | Number of Participants | Participant Constituency | Program Goals                                                          | Number of Sessions | Hours in Program | Program Activities                                                                                   | Program Evaluation           |
|-----------------------------|------------------|------------------|------------------|------------------------|--------------------------|------------------------------------------------------------------------|--------------------|------------------|------------------------------------------------------------------------------------------------------|------------------------------|
| Zohouri, <i>et al</i> (25). | 2017             | Article          | Shiraz, Iran     | 350                    | Medical students         | To use a literary narrative to foster reflection on end-of-life issues | 1                  | 2                | Used the Kolb four-stage experiential model to write reflectively about their thoughts on a novella. | Qualitative – Well Described |

<sup>a</sup> Abbreviations: N/S – Not specified; N/A – Not applicable

<sup>b</sup> Results of evaluations were not mentioned in the abstract; thus, these results have not been included with the descriptions of positive NM program outcomes discussed in the text of our review.

<sup>c</sup> Results were not statistically significant; thus, these results have not been included with the description of positive NM program outcomes discussed in the text of our review.

**Supplemental Digital Appendix 4.** Locations of Programs Included in Narrative Medicine Systematic Review



United States of America



World

## Supplemental Digital Appendix 5. Quantitative and Qualitative Incomplete Evaluation Descriptions of Narrative Medicine Programs in Systematic Review<sup>1</sup>

| <b>Quantitative – Incomplete Description</b>                                                                                                                                                                                             |                                                      |                                                                                                                                                                     |                                                                                                                                                                                        |
|------------------------------------------------------------------------------------------------------------------------------------------------------------------------------------------------------------------------------------------|------------------------------------------------------|---------------------------------------------------------------------------------------------------------------------------------------------------------------------|----------------------------------------------------------------------------------------------------------------------------------------------------------------------------------------|
| <b>Reference</b>                                                                                                                                                                                                                         | <b>Outcome–<br/>new or<br/>validated<br/>measure</b> | <b>Outcome(s)</b>                                                                                                                                                   | <b>Rationale for determining incomplete<br/>evaluation</b>                                                                                                                             |
| Boudreau, <i>et al.</i> AND Liben S, <i>et al.</i> (5, 6)                                                                                                                                                                                | New                                                  | Narrative Skills Assessment Tool                                                                                                                                    | Authors report no consistent differences in responses between attendees and non-attendees. Scores not reported.                                                                        |
| Elliott D, <i>et al.</i> AND Schaff P.(30, 31)                                                                                                                                                                                           | New                                                  | 1) satisfaction with workshop, 2) usefulness of workshop in enhancing perspectives about some of the guiding principles of Family Medicine, 3) value of the session | The percent agreement was reported, but not the total N or the actual wording of the evaluation questions                                                                              |
| Gowda D, <i>et al.</i> (15)                                                                                                                                                                                                              | Validated                                            | Maslach Burnout Inventory, Utrecht Work Engagement Score, Team Development, Interpersonal Reactivity                                                                | “At baseline, scores for burnout were higher for attending physicians, while scores for other instruments were comparable. Pre-post differences will be available by conference date.” |
| Jacobs ZG, Sgro G.(35)                                                                                                                                                                                                                   | Validated                                            | Maslach Burnout Inventory, Toronto Empathy Questionnaire, Interpersonal Reactivity                                                                                  | “The outcome of the workshop is yet to be determined, but the hope is to demonstrate that our curriculum improves participant empathy and sympathy while reducing burnout.”            |
| Murinson, B.(18)                                                                                                                                                                                                                         | New                                                  | Effectiveness of pain narratives on augmenting awareness of the nuances reality of pain                                                                             | Authors report general high-level results in narrative. Quantitative results not reported.                                                                                             |
| Spike J.(21)                                                                                                                                                                                                                             | New                                                  | Satisfaction with training                                                                                                                                          | Line graphs of distributions are provided for each measure as an attachment for two rounds of the training; Ns are not provided.                                                       |
| Winkel AF, <i>et al.</i> (23)                                                                                                                                                                                                            | Validated                                            | Maslach Burnout Inventory, Interpersonal Reactivity                                                                                                                 | “The results were not examined for quantitative trends because the numbers of participants were too small for relevant statistical analysis.”                                          |
| Wohlmann A, Halstein M.(24)                                                                                                                                                                                                              | New                                                  | satisfaction and relevance of course to future work                                                                                                                 | Reported in text the N of particular response categories, but not of the entire scale; unable to document the full evaluation findings from what is presented in narrative.            |
| <b>Qualitative – Incomplete Description</b>                                                                                                                                                                                              |                                                      |                                                                                                                                                                     |                                                                                                                                                                                        |
| Balmer, <i>et al.</i> (28), Elliott D, <i>et al.</i> AND Schaff P. (30, 31), Roy R(42), Shankar PR(43)                                                                                                                                   |                                                      |                                                                                                                                                                     |                                                                                                                                                                                        |
| <b>None/Not Specified</b>                                                                                                                                                                                                                |                                                      |                                                                                                                                                                     |                                                                                                                                                                                        |
| Aronson L, Schwalbe W.(26), Ball SC(27) Heller FE(32), Hellerstein DJ(33), Hurst M, Irvine C(34), Kissler, <i>et al.</i> (36), Lane-Reticker A, Fogel C(37), Machado MC, Lobo A J(38), Mark, <i>et al.</i> (39), Robeson R, King NMP(41) |                                                      |                                                                                                                                                                     |                                                                                                                                                                                        |

<sup>1</sup> All Quantitative Evaluations – Well Described report evaluation at the end of the program except for Elliott D, *et al.* and Schaff P. 30. Elliott D, Schaff P, Woehrl T, Walsh A, Trial J. Narrative Reflection in Family Medicine Clerkship - Cultural Competence in the Third Year Required Clerkships. MedEdPORTAL. 2010;6(1153), 31. Schaff P. Donning the White Coat: The Narrative Threads of Professional Development. J Learn Through the Arts. 2006;2(1):21. and Gowda D, *et al.*(13), which do not specify timing.

## Supplemental Digital Appendix 6: Basic Checklist for Designing, Implementing, Evaluating, and Disseminating a Narrative Medicine Program in Academic Medicine/Health Sciences

### Program Design

#### *Identify participant constituency*

- |                                                            |                                                |
|------------------------------------------------------------|------------------------------------------------|
| <input type="checkbox"/> Allied Health Professionals       | <input type="checkbox"/> Nursing Students      |
| <input type="checkbox"/> Faculty (clinical, research)      | <input type="checkbox"/> Physician Non-Faculty |
| <input type="checkbox"/> Graduate Health Sciences Students | <input type="checkbox"/> Residents/Fellows     |
| <input type="checkbox"/> Medical Students                  | <input type="checkbox"/> Staff                 |
| <input type="checkbox"/> Nurses                            | <input type="checkbox"/> Other                 |

#### *Conduct a needs assessment with target constituency*

- |                                                       |                                                    |
|-------------------------------------------------------|----------------------------------------------------|
| <input type="checkbox"/> Perceived Narrative Interest | <input type="checkbox"/> Perceived Narrative Needs |
|-------------------------------------------------------|----------------------------------------------------|

#### *Identify target goals and outcomes*

- |                                                                               |                                                   |
|-------------------------------------------------------------------------------|---------------------------------------------------|
| <input type="checkbox"/> Burnout Detection/Mitigation                         | <input type="checkbox"/> Perspective-taking       |
| <input type="checkbox"/> Clinical Competence                                  | <input type="checkbox"/> Professionalism/Vocation |
| <input type="checkbox"/> Confidence/Self-efficacy                             | <input type="checkbox"/> Relationship Building    |
| <input type="checkbox"/> Empathy/Sympathy                                     | <input type="checkbox"/> Reflection               |
| <input type="checkbox"/> Medical Team Functioning                             | <input type="checkbox"/> Relevance to Work        |
| <input type="checkbox"/> Narrative Competence (including Attentive Listening) | <input type="checkbox"/> Resilience               |
| <input type="checkbox"/> Participant Satisfaction                             | <input type="checkbox"/> Wellness                 |
| <input type="checkbox"/> Pedagogy Skills                                      | <input type="checkbox"/> Writing Skills           |
|                                                                               | <input type="checkbox"/> Other                    |

#### *Identify program timeline and session format*

- |                                   |                                                                  |
|-----------------------------------|------------------------------------------------------------------|
| <input type="checkbox"/> Timeline | <input type="checkbox"/> Session Format (e.g. frequency, length) |
|-----------------------------------|------------------------------------------------------------------|

#### *Identify activities that will best support the achievement of specified goals and outcomes*

- |                                                       |                                                      |
|-------------------------------------------------------|------------------------------------------------------|
| <input type="checkbox"/> Group Discussion             | <input type="checkbox"/> Sharing of In-Class Writing |
| <input type="checkbox"/> Group Reading                | <input type="checkbox"/> Writing Workshop            |
| <input type="checkbox"/> Individual Reading           | <input type="checkbox"/> Other                       |
| <input type="checkbox"/> Reflective Writing Exercises |                                                      |

#### *Create curriculum in accordance with selected goals and activities*

- |                                                        |                                |
|--------------------------------------------------------|--------------------------------|
| <input type="checkbox"/> Principles of Adult Education | <input type="checkbox"/> Other |
|--------------------------------------------------------|--------------------------------|

#### *Formulate an evaluation methodology to best measure overall effectiveness*

- |                                       |                                        |
|---------------------------------------|----------------------------------------|
| <input type="checkbox"/> Qualitative  | <input type="checkbox"/> Mixed Methods |
| <input type="checkbox"/> Quantitative |                                        |

#### *Formulate an evaluation strategy for implementation*

- |                                             |                                     |
|---------------------------------------------|-------------------------------------|
| <input type="checkbox"/> Formative          | <input type="checkbox"/> Short-term |
| <input type="checkbox"/> Pre/Post Summative | <input type="checkbox"/> Long-term  |

#### *Consider theory of change in program design*

### Program Implementation

#### *Organize logistics*

- |                                    |                                |
|------------------------------------|--------------------------------|
| <input type="checkbox"/> Venue     | <input type="checkbox"/> Food  |
| <input type="checkbox"/> Materials | <input type="checkbox"/> Other |

#### *Recruit participants*

- |                                                                    |                                        |
|--------------------------------------------------------------------|----------------------------------------|
| <input type="checkbox"/> Direct Email                              | <input type="checkbox"/> Word of Mouth |
| <input type="checkbox"/> Institution-wide/Departmental Newsletters | <input type="checkbox"/> Other         |

#### *Distribute pre-work to participants in advance of each session*

- |                                                |                                                                            |
|------------------------------------------------|----------------------------------------------------------------------------|
| <input type="checkbox"/> Literary Pre-readings | <input type="checkbox"/> Participant-generated Narratives for Workshopping |
|------------------------------------------------|----------------------------------------------------------------------------|

---

**Program Evaluation**


---

*Assess according to pre-determined evaluation strategy*

- |                                                                         |                                                       |
|-------------------------------------------------------------------------|-------------------------------------------------------|
| <input type="checkbox"/> Pre-/post- program summative evaluations       | <input type="checkbox"/> Short-/long-term evaluations |
| <input type="checkbox"/> Formative evaluation at conclusion of sessions | <input type="checkbox"/> Other                        |

*Map target goals to outcomes to assess effectiveness*

- |                                                       |                                                   |
|-------------------------------------------------------|---------------------------------------------------|
| <input type="checkbox"/> Attentive Listening          | <input type="checkbox"/> Perspective-taking       |
| <input type="checkbox"/> Burnout Detection/Mitigation | <input type="checkbox"/> Professionalism/Vocation |
| <input type="checkbox"/> Clinical Competence          | <input type="checkbox"/> Relationship Building    |
| <input type="checkbox"/> Confidence/Self-efficacy     | <input type="checkbox"/> Reflection               |
| <input type="checkbox"/> Empathy/Sympathy             | <input type="checkbox"/> Relevance to Work        |
| <input type="checkbox"/> Medical Team Functioning     | <input type="checkbox"/> Resilience               |
| <input type="checkbox"/> Narrative Competence         | <input type="checkbox"/> Wellness                 |
| <input type="checkbox"/> Participant Satisfaction     | <input type="checkbox"/> Writing Skills           |
| <input type="checkbox"/> Pedagogy Skills              | <input type="checkbox"/> Other                    |
- 

**Program Dissemination**


---

*Identify suitable format*

- |                                                  |                                          |
|--------------------------------------------------|------------------------------------------|
| <input type="checkbox"/> Book Chapter            | <input type="checkbox"/> Curriculum      |
| <input type="checkbox"/> Conference Presentation | <input type="checkbox"/> Journal Article |

*Identify suitable target venue*

- |                                     |                                  |
|-------------------------------------|----------------------------------|
| <input type="checkbox"/> Conference | <input type="checkbox"/> Website |
| <input type="checkbox"/> Journal    | <input type="checkbox"/> Other   |

*Include relevant program details for successful replication at other institutions*

- |                                            |                                                 |
|--------------------------------------------|-------------------------------------------------|
| <input type="checkbox"/> Conceptualization | <input type="checkbox"/> Activities             |
| <input type="checkbox"/> Scope             | <input type="checkbox"/> Curriculum             |
| <input type="checkbox"/> Design            | <input type="checkbox"/> Evaluation Methodology |
| <input type="checkbox"/> Goals             | <input type="checkbox"/> Evaluation Results     |

*Submit to target venue*

## References

1. Arntfield SL, Slesar K, Dickson J, Charon R. Narrative medicine as a means of training medical students toward residency competencies. *Patient Educ Couns*. 2013;91(3):280-6.
2. Balmer DF, Richards BF. Faculty development as transformation: lessons learned from a process-oriented program. *Teach Learn Med*. 2012;24(3):242-7.
3. Birigwa SN, Khedagi AM, Katz CJ. Stop, look, listen, then breathe: The impact of a narrative medicine curriculum on pediatric residents. *Acad Pediatr*. 2017;17(5):e40-e1.
4. Bobb SJ. Finding meaning and sense-making in hospital nursing teams: The promise of Narrative Medicine. US: Marquette University 2017.
5. Boudreau JD, Liben S, Fuks A. A faculty development workshop in narrative-based reflective writing. *Perspect Med Educ*. 2012;1(3):143-54.
6. Liben S, Chin K, Boudreau JD, Boillat M, Steinert Y. Assessing a faculty development workshop in narrative medicine. *Med Teach*. 2012;34(12):e813-9.
7. Brigley S, Jasper M. Evaluation of a multidisciplinary faculty to support learning in surgical practice. *J Interprof Care*. 2010;24(4):401-11.
8. Chretien KC, Swenson R, Yoon B, Julian R, Keenan J, Kheirbek R. Storytelling with inpatients. *J Gen Intern Med*. 2014;29(1 (Supplement)):S534-S5.
9. Chretien KC, Swenson R, Yoon B, Julian R, Keenan J, Croffoot J, et al. Tell Me Your Story: A Pilot Narrative Medicine Curriculum During the Medicine Clerkship. *J Gen Intern Med*. 2015;30(7):1025-8.
10. DasGupta S, Meyer D, Calero-Breckheimer A, Costley AW, Guillen S. Teaching cultural competency through narrative medicine: intersections of classroom and community. *Teach Learn Med*. 2006;18(1):14-7.
11. DasGupta S. How to Catch the Story but Not Fall Down: Reading Our Way to More Culturally Appropriate Care. *Virtual Mentor*. 2006;8(5):315-8.
12. Goodrich TJ, Irvine CA, Boccher-Lattimore D. Narrative Ethics as Collaboration: A Four-Session Curriculum. *Fam Syst Health*. 2005;23(3):348-57.
13. Gordon E. Echoes of burnout in internal medicine resident narrative essays. *J Gen Intern Med*. 2017;32(2):S171-S2.
14. Goupy F, Abgrall-Barbry G, Aslangul E, Chahwakilian A, Delaitre D, Girard T, et al. Can narrative medicine be an answer to patient physician relationship teaching according to students' demand in medical education curricula? *Presse Med*. 2013;42(1):e1-e8.
15. Gowda D, Balmer D, Khedagi A, Curran T, Mangold M, Jiwani F, et al. Year-long narrative medicine intervention to improve interprofessional practice in three primary care practices. *J Gen Intern Med*. 2017;32(2):S725.
16. Holub PG. The influence of narrative in fostering affective development of medical professionalism in an online class. US: Nova Southeastern University; 2011.
17. Kennedy AJ, Sgro G. Birmingham voices: Developing narrative competency to better serve vulnerable populations. *J Gen Intern Med*. 2016;31(2):S806.
18. Murinson B. Pain and the humanities: exploring the meaning of pain in medicine through drama, literature, fine arts and philosophy. *MedEdPORTAL*. 2010;6(8129).
19. Polvani S, Mammucari M, Zuppiroli A, Bandini F, Milli M, Fioretto L, et al. Narrative medicine, a model of clinical governance: The experience of the Local Health Authority of Florence in Italy. *Clinical Practice*. 2014;11(5):493-9.
20. Small LC, Feldman LS, Oldfield BJ. Using Narrative Medicine to Build Community Across the Health Professions and Foster Self-Care. *J Radiol Nurs*. 2017;36(4):224-7.



21. Spike J. Patient-Centered Medicine: Writing Your Patient's Life Story. *MedEdPORTAL*. 2008;4(793).
22. Walker MR, Zúñiga D, Triviño X. Narrativa y formación docente: la experiencia de 5 años de un taller de escritura. *Revista Medica de Chile*. 2012;140(5):659-66.
23. Winkel AF, Hermann N, Graham MJ, Ratan RB. No time to think: making room for reflection in obstetrics and gynecology residency. *J Grad Med Educ*. 2010;2(4):610-5.
24. Wohlmann A, Halstein M. Narrative Medizin: Ein Pilotprojekt im Skills Lab der Universitätsmedizin Mainz. *ZFA (Stuttgart)*. 2016;92(11):456-60.
25. Zohouri M, Amini M, Sagheb MM. Fourth year medical students' reflective writing on "Death of Ivan Ilych": a qualitative study. *J Adv Med Educ Prof*. 2017;5(2):73-7.
26. Aronson L, Schwalbe W. The art and craft of writing for self-care and narrative advocacy: A workshop in reflective and public writing. *J Pain Symptom Manage*. 2015;49(2):322.
27. Ball SC. Enhancing medicine subinternship through narrative medicine. *J Gen Intern Med*. 2011;26:S617.
28. Balmer D, Gill A, Nuila R. Integrating narrative medicine into clinical care. *Med Educ*. 2016;50(5):581-2.
29. Bhavaraju VL, Miller S. Faculty development in narrative medicine: using stories to teach, learn, and thrive. *J Grad Med Educ*. 2014;6(2):355-6.
30. Elliott D, Schaff P, Woehrle T, Walsh A, Trial J. Narrative Reflection in Family Medicine Clerkship - Cultural Competence in the Third Year Required Clerkships. *MedEdPORTAL*. 2010;6(1153).
31. Schaff P. Donning the White Coat: The Narrative Threads of Professional Development. *J LearnThrough the Arts*. 2006;2(1):21.
32. Heller EA, Heller FE. Narrative medicine: A practical application for using writing as a clinical intervention with cancer patients, caregivers and the clinicians that care for them. *Psycho-Oncology*. 2016;25:10.
33. Hellerstein DJ. "The City of the Hospital": On Teaching Medical Students to Write. *J Med Humanit*. 2015;36(4):269-89.
34. Hurst M, Irvine C. Stories of the end: A narrative medicine curriculum to reframe death and dying. *Our changing journey to the end: Reshaping death, dying, and grief in America: New paths of engagement; New venues in the search for dignity and grace, Vols 1-2*. Santa Barbara, CA, US: Praeger/ABC-CLIO; 2014. p. 85-99.
35. Jacobs ZG, Sgro G. Pittsburgh narratives: A multidisciplinary workshop in narrative medicine. *J Gen Intern Med*. 2017;32(2):S697-S8.
36. Kissler MJ, Saxton B, Nuila R, Balmer DF. Professional Formation in the Gross Anatomy Lab and Narrative Medicine: An Exploration. *Acad Med*. 2016;91(6):772-7.
37. Lane-Reticker A, Fogel C. Introducing a humanities focus into a curriculum for midcareer HPM trainees. *J Pain Symptom Manage*. 2012;43(2):446.
38. Machado MC, Lobo Antunes J. Narrativa da Doença: Uma Disciplina Optativa na Faculdade de Medicina de Lisboa. *Acta medica portuguesa*. 2016;29(12):790-2.
39. Mark MSJ, Todd K, Todd D. The language of illness: The art of telling, listening, and self-care through narrative medicine. *J Pain Symptom Manage*. 2017;53(2):321-2.
40. Moss HA, Winkel AF, Jewell A, Musa F, Mitchell L, Speed E, et al. Narrative medicine: Using reflective writing workshops to help house staff address the complex and challenging nature of caring for gynecologic oncology patients. *Gynecol Oncol*. 2014;133:73.

- 1  
2  
3 41. Robeson R, King NMP. Performable Case Studies in Ethics Education. Healthcare  
4 (Basel, Switzerland). 2017;5(3).  
5 42. Roy R. Teaching Cultural Sensitivity through Literature and Reflective Writing. Virtual  
6 Mentor. 2007;9(8):543-6.  
7 43. Shankar PR. A voluntary medical humanities module in a medical college in Western  
8 Nepal: participant feedback. Teach Learn Med. 2009;21(3):248-53.  
9 44. Winkel AF. Narrative Medicine: A Writing Workshop Curriculum for Residents.  
10 MedEdPORTAL. 2016;12(10493).  
11 45. Winkel AF, Feldman N, Moss H, Jakalow H, Simon J, Blank S. Narrative Medicine  
12 Workshops for Obstetrics and Gynecology Residents and Association With Burnout Measures.  
13 Obstet Gynecol. 2016;128 Suppl 1:27s-33s.  
14  
15  
16  
17  
18  
19  
20  
21  
22  
23  
24  
25  
26  
27  
28  
29  
30  
31  
32  
33  
34  
35  
36  
37  
38  
39  
40  
41  
42  
43  
44  
45  
46  
47  
48  
49  
50  
51  
52  
53  
54  
55  
56  
57  
58  
59  
60

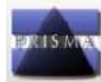

# PRISMA 2009 Checklist

| Section/topic                      | #  | Checklist item                                                                                                                                                                                                                                                                                              | Reported on page # |
|------------------------------------|----|-------------------------------------------------------------------------------------------------------------------------------------------------------------------------------------------------------------------------------------------------------------------------------------------------------------|--------------------|
| <b>TITLE</b>                       |    |                                                                                                                                                                                                                                                                                                             |                    |
| Title                              | 1  | Identify the report as a systematic review, meta-analysis, or both.                                                                                                                                                                                                                                         | 1                  |
| <b>ABSTRACT</b>                    |    |                                                                                                                                                                                                                                                                                                             |                    |
| Structured summary                 | 2  | Provide a structured summary including, as applicable: background; objectives; data sources; study eligibility criteria, participants, and interventions; study appraisal and synthesis methods; results; limitations; conclusions and implications of key findings; systematic review registration number. | 2-4                |
| <b>INTRODUCTION</b>                |    |                                                                                                                                                                                                                                                                                                             |                    |
| Rationale                          | 3  | Describe the rationale for the review in the context of what is already known.                                                                                                                                                                                                                              | 6-7                |
| Objectives                         | 4  | Provide an explicit statement of questions being addressed with reference to participants, interventions, comparisons, outcomes, and study design (PICOS).                                                                                                                                                  | 7-8                |
| <b>METHODS</b>                     |    |                                                                                                                                                                                                                                                                                                             |                    |
| Protocol and registration          | 5  | Indicate if a review protocol exists, if and where it can be accessed (e.g., Web address), and, if available, provide registration information including registration number.                                                                                                                               | N/A                |
| Eligibility criteria               | 6  | Specify study characteristics (e.g., PICOS, length of follow-up) and report characteristics (e.g., years considered, language, publication status) used as criteria for eligibility, giving rationale.                                                                                                      | 8-9                |
| Information sources                | 7  | Describe all information sources (e.g., databases with dates of coverage, contact with study authors to identify additional studies) in the search and date last searched.                                                                                                                                  | 9-10;<br>Appendix  |
| Search                             | 8  | Present full electronic search strategy for at least one database, including any limits used, such that it could be repeated.                                                                                                                                                                               | 9-10;<br>Appendix  |
| Study selection                    | 9  | State the process for selecting studies (i.e., screening, eligibility, included in systematic review, and, if applicable, included in the meta-analysis).                                                                                                                                                   | 10-12              |
| Data collection process            | 10 | Describe method of data extraction from reports (e.g., piloted forms, independently, in duplicate) and any processes for obtaining and confirming data from investigators.                                                                                                                                  | 10-12              |
| Data items                         | 11 | List and define all variables for which data were sought (e.g., PICOS, funding sources) and any assumptions and simplifications made.                                                                                                                                                                       | 10-12              |
| Risk of bias in individual studies | 12 | Describe methods used for assessing risk of bias of individual studies (including specification of whether this was done at the study or outcome level), and how this information is to be used in any data synthesis.                                                                                      | 10-12              |
| Summary measures                   | 13 | State the principal summary measures (e.g., risk ratio, difference in means).                                                                                                                                                                                                                               | 10-12              |
| Synthesis of results               | 14 | Describe the methods of handling data and combining results of studies, if done, including measures of consistency (e.g., I <sup>2</sup> ) for each meta-analysis.                                                                                                                                          | 10-12              |



# PRISMA 2009 Checklist

Page 1 of 2

| Section/topic                 | #  | Checklist item                                                                                                                                                                                           | Reported on page #             |
|-------------------------------|----|----------------------------------------------------------------------------------------------------------------------------------------------------------------------------------------------------------|--------------------------------|
| Risk of bias across studies   | 15 | Specify any assessment of risk of bias that may affect the cumulative evidence (e.g., publication bias, selective reporting within studies).                                                             | 10-12                          |
| Additional analyses           | 16 | Describe methods of additional analyses (e.g., sensitivity or subgroup analyses, meta-regression), if done, indicating which were pre-specified.                                                         | 10-12                          |
| <b>RESULTS</b>                |    |                                                                                                                                                                                                          |                                |
| Study selection               | 17 | Give numbers of studies screened, assessed for eligibility, and included in the review, with reasons for exclusions at each stage, ideally with a flow diagram.                                          | Figure 1; Table 1              |
| Study characteristics         | 18 | For each study, present characteristics for which data were extracted (e.g., study size, PICOS, follow-up period) and provide the citations.                                                             | 12-17; Tables; Appendix        |
| Risk of bias within studies   | 19 | Present data on risk of bias of each study and, if available, any outcome level assessment (see item 12).                                                                                                | 12-17; 24-25; Tables; Appendix |
| Results of individual studies | 20 | For all outcomes considered (benefits or harms), present, for each study: (a) simple summary data for each intervention group (b) effect estimates and confidence intervals, ideally with a forest plot. | 12-17; Tables; Appendix        |
| Synthesis of results          | 21 | Present results of each meta-analysis done, including confidence intervals and measures of consistency.                                                                                                  | 12-17; Tables                  |
| Risk of bias across studies   | 22 | Present results of any assessment of risk of bias across studies (see Item 15).                                                                                                                          | 12-17; 24-25                   |
| Additional analysis           | 23 | Give results of additional analyses, if done (e.g., sensitivity or subgroup analyses, meta-regression [see Item 16]).                                                                                    | 12-17                          |
| <b>DISCUSSION</b>             |    |                                                                                                                                                                                                          |                                |
| Summary of evidence           | 24 | Summarize the main findings including the strength of evidence for each main outcome; consider their relevance to key groups (e.g., healthcare providers, users, and policy makers).                     | 17-23                          |
| Limitations                   | 25 | Discuss limitations at study and outcome level (e.g., risk of bias), and at review-level (e.g., incomplete retrieval of identified research, reporting bias).                                            | 24-25                          |
| Conclusions                   | 26 | Provide a general interpretation of the results in the context of other evidence, and implications for future research.                                                                                  | 25-26                          |
| <b>FUNDING</b>                |    |                                                                                                                                                                                                          |                                |
| Funding                       | 27 | Describe sources of funding for the systematic review and other support (e.g., supply of data); role of funders for the systematic review.                                                               | 35                             |



# PRISMA 2009 Checklist

- 1
- 2
- 3
- 4
- 5
- 6
- 7
- 8
- 9
- 10
- 11
- 12
- 13
- 14
- 15
- 16
- 17
- 18
- 19
- 20
- 21
- 22
- 23
- 24
- 25
- 26
- 27
- 28
- 29
- 30
- 31
- 32
- 33
- 34
- 35
- 36
- 37
- 38
- 39
- 40
- 41
- 42
- 43
- 44
- 45
- 46
- 47

For more information, visit: [www.prisma-statement.org](http://www.prisma-statement.org).

For peer review only
